# Supplementary material for: Straightforward synthesis of biologically valuable nonsymmetrical malonamides under mild conditions
Source: Royal Society of Chemistry journal article supplement (doi:10.1039/d2gc00395c), 2022-01-01

## *Supporting Information*

### **Straightforward Synthesis of Biologically Valuable Nonsymmetrical Malonamides Under Mild Conditions**

Zhiguo Zhang,<sup>a,\*</sup> Xiyang Cao,<sup>a</sup> Gang Wang, Guisheng Zhang,<sup>a,\*</sup> Xingjie Zhang

<sup>a</sup> *Key Laboratory of Green Chemical Media and Reactions, Ministry of Education; Collaborative Innovation Center of Henan Province for Green Manufacturing of Fine Chemicals; NMPA Key Laboratory for Research and Evaluation of Innovative Drug; School of Chemistry and Chemical Engineering, Henan Normal University, 46 East of Construction Road, Xinxiang, Henan 453007, China.*

*E-mail: zhangzg@htu.edu.cn and zgs6668@yahoo.com Fax: (+86)-373-332-5250.*

### **Table of Contents**

|                                                         |     |
|---------------------------------------------------------|-----|
| I. General Remarks.....                                 | S2  |
| II. General Procedures.....                             | S3  |
| III. Dosage Screening of MgCl <sub>2</sub> .....        | S8  |
| IV. Analytical Data of Compounds.....                   | S9  |
| V. References.....                                      | S22 |
| VI. <sup>1</sup> H and <sup>13</sup> C NMR Spectra..... | S23 |

## I. General Remarks

All reagents were purchased from commercial sources and used without further treatment, unless otherwise indicated. Petroleum ether (PE) used here refers to the 60–90 °C boiling point fraction of petroleum. Ethyl acetate is abbreviated as EA. <sup>1</sup>H NMR and <sup>13</sup>C NMR spectra were recorded on a Bruker Avance/600 (<sup>1</sup>H: 600 MHz, <sup>13</sup>C:150 MHz) or Bruker Avance/400 (<sup>1</sup>H: 400 MHz, <sup>13</sup>C: 100 MHz at 25 °C) with tetramethylsilane as the internal standard. Data are represented as follows: chemical shift, integration, multiplicity (br = broad, s = singlet, d = doublet, dd = double doublet, t = triplet, q = quartet, and m = multiplet), and coupling constants in Hertz (Hz). All high-resolution mass spectra (HRMS) were measured on a mass spectrometer by using electrospray ionization orthogonal acceleration time-of-flight (ESI-OA-TOF), and the purity of all samples used for HRMS (>95%) was confirmed by <sup>1</sup>H NMR and <sup>13</sup>C NMR spectroscopic analysis. Melting points were measured on a melting point apparatus equipped with a thermometer and were uncorrected. All reactions were monitored by thin-layer chromatography (TLC) with GF254 silica gel-coated plates. Flash chromatography was carried out on SiO<sub>2</sub> (silica gel 200–300 mesh).

## II. General Procedures

### 1. General Procedure for the Preparation of Reagents

Starting materials isocyanates **1** and  $\beta$ -ketoamides **2a-2l**, **2o**, **2q**, **2t** and **2u-2v** are obtained from commercial sources. Other starting materials **2** were synthesized following the literatures, and the procedures were described below.

#### Isocyanates

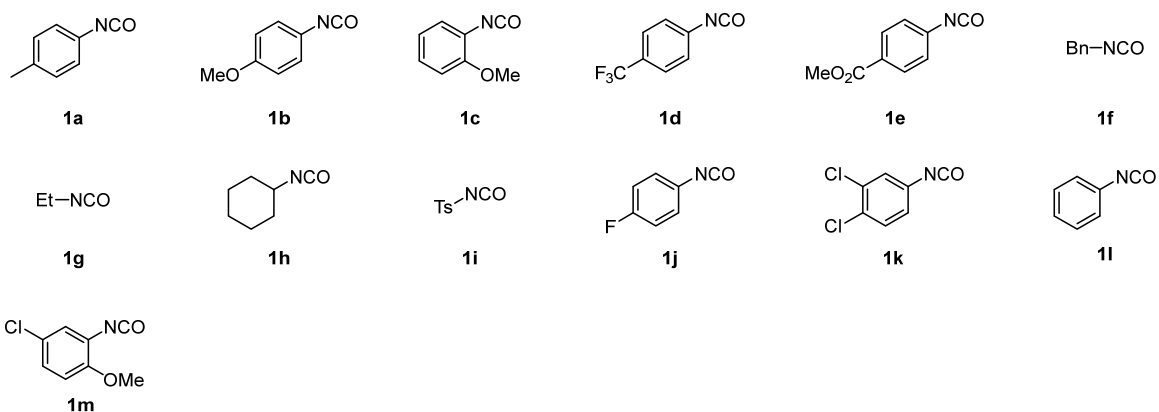

#### $\beta$ -Ketoamides

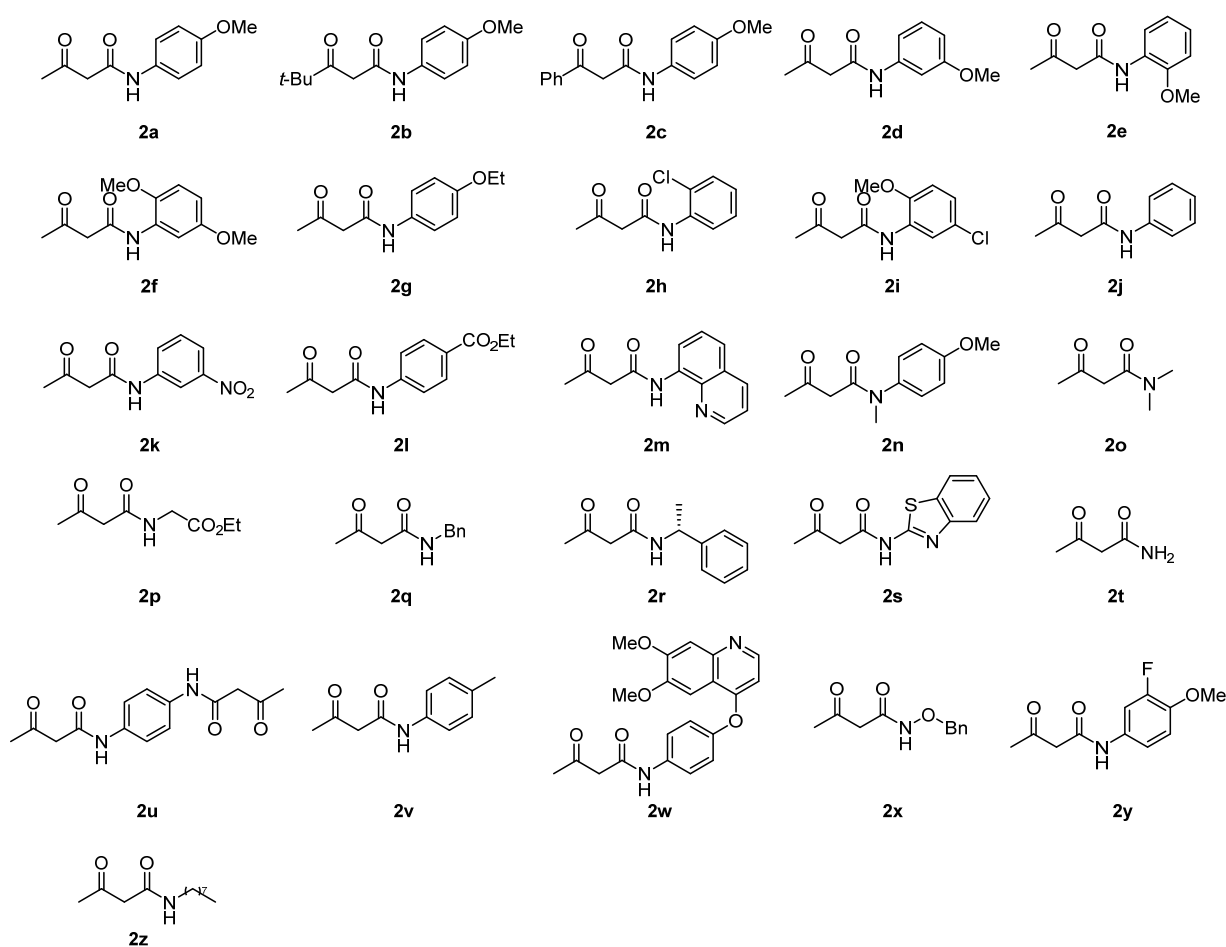

**Method A:** Substrates **2b**, **2c**, **2l**, **2m**, **2s** and **2w** were synthesized according to the literature.<sup>1</sup>

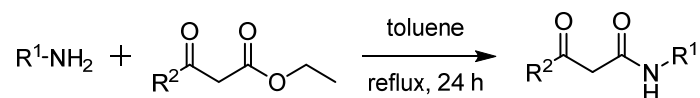

Anilines (1.0 equiv),  $\beta$ -ketoesters (1.1 equiv) and toluene (0.5 M) in an oven dried round bottom flask equipped with a magnetic stir bar. The resulting mixture was heated under reflux for 24 h. The reaction mixture was allowed to cool to ambient temperature and toluene was removed under reduced pressure. The crude reaction mixture was purified by flash silica gel column chromatography (PE / EA = 3:1) to afford the desired product **2b**, **2c**, **2l**, **2m**, **2s** and **2w**.

**Method B:** Substrates **2n**, **2x**, **2y** and **2z** were synthesized according to the literature.<sup>2</sup>

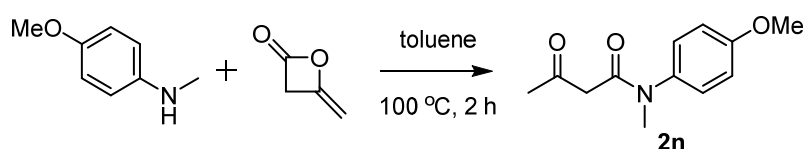

Diketene (1.1 equiv) was added to a magnetically stirred solution of the substituted anilines (1.0 equiv) in toluene (0.5 M), and the mixture was heated at 100 °C for 2 h. The reaction mixture was monitored by TLC. After completion of the reactions, the solution was evaporated under reduced pressure. The crude reaction mixture was purified by flash silica gel column chromatography (PE / EA = 3:1) to afford the desired product **2n**, **2x**, **2y** and **2z**.

**Method C:** The general procedure for the synthesis of **2p**.

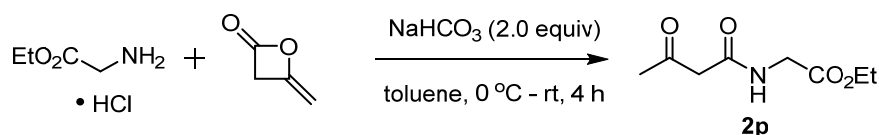

Add glycine ethyl ester hydrochloride (1.0 equiv) and NaHCO<sub>3</sub> (2.0 equiv) to toluene (0.5 M) and stir at room temperature for 0.5 h, add diketene (1.1 equiv) at 0 °C and the mixture was heated at rt for 4 h. The reaction mixture was monitored by TLC. After completion of the reactions, the solution was evaporated under reduced pressure. The crude reaction mixture was purified by flash silica gel column chromatography (PE / EA = 1:1) to afford the desired product **2p**.

**Method D:** Substrates **2r** were synthesized according to the literature.<sup>3</sup>

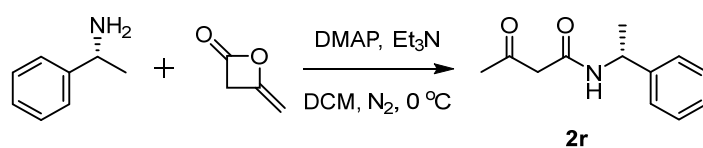

4-Dimethylaminopyridine (0.45 equiv), triethylamine (1.0 equiv), and

(*R*)-1-phenylethan-1-amine (1.0 equiv) were dissolved in DCM (0.5 M), at 0 °C under an argon atmosphere. The reaction mixture was stirred for 10 min, then diketene (2.0 equiv) was added dropwise. After 4 h, the reaction was quenched with 5% aqueous KOH and extracted with DCM (3 × 20 mL). The combined extracts were dried (Na<sub>2</sub>SO<sub>4</sub>) and evaporated under reduced pressure. The crude reaction mixture was purified by flash silica gel column chromatography (PE / EA = 3:1) to afford the desired product **2r**.

## 2. General Procedure for the Synthesis of Nonsymmetrical Malonamides

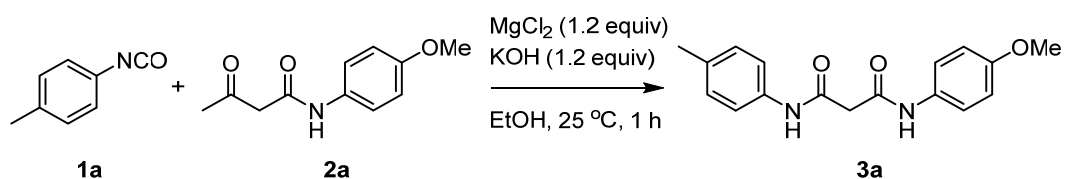

To a 15 mL tube was added **2a** (103.5 mg, 0.5 mmol), MgCl<sub>2</sub> (57 mg, 1.2 equiv), KOH (40 mg, 1.2 equiv, 85%+), EtOH (3 mL), and stirred at 25 °C for 0.5 h before **1a** (80 mg, 0.6 mmol) was added. Then the reaction mixture was stirred at 25 °C for 1 h (the whole process was closely monitored by TLC). After completion of the reactions, the solution was evaporated under reduced pressure. The crude reaction mixture was purified by flash silica gel column chromatography (EA : DCM : PE : Et<sub>3</sub>N = 50 : 100 : 50 : 1) to give primary amide **3a** as white solid (135 mg, 91%).

## 3. General Procedure for the Gram-Scale Synthesis of **3s**

*N*<sup>1</sup>,*N*<sup>1</sup>-(1,4-phenylene)bis(*N*<sup>3</sup>-(*p*-tolyl)malonamide) (**3s**): To a 250 mL round-bottom flask was added *N,N*-(1,4-phenylene)bis(3-oxobutanamide) (**2u**) (5.52 g, 20 mmol), MgCl<sub>2</sub> (4.19 g, 2.2 equiv), KOH (2.90 g, 1.2 equiv, 85%+). Then the mixture was stirred well in EtOH (120 mL) at 25 °C for 0.5 h, then 1-isocyanato-4-methylbenzene (**1a**) (5.86 g, 44 mmol) was added and stir at room temperature for 4 h, After the completion of the reaction, 300 mL of distilled water was added to the reaction, suction filtered under reduced pressure and the crude product was washed with a large amount of water and dried in vacuum to give **3s** as a white solid (8.59 g, 94%).

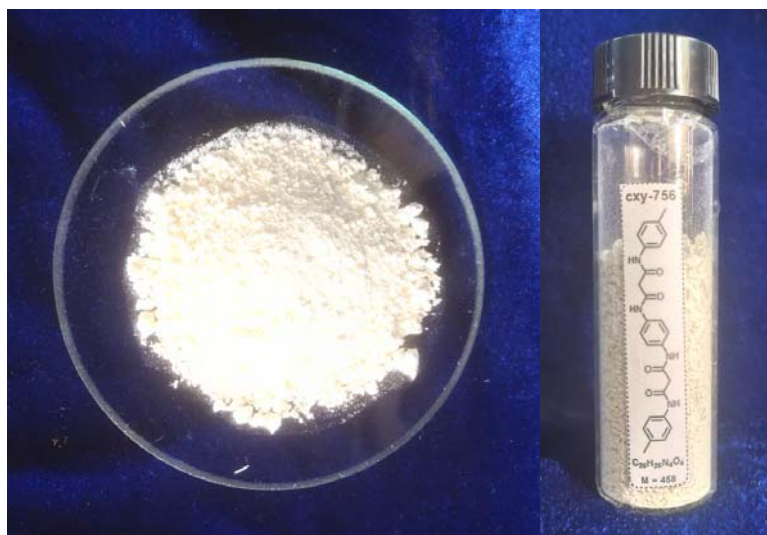

#### 4. General Procedure for the Synthetic Applications (**3ab** as the example)

Synthesis of **2w**: 4-((6,7-dimethoxyquinolin-4-yl)oxy) aniline (20 mmol, 1.0 equiv), ethyl acetoacetate (22 mmol, 1.1 equiv) and toluene (100 mL) in an oven dried round bottom flask (250 mL) equipped with a magnetic stir bar. The resulting mixture was heated under reflux for 24 h. The reaction mixture was allowed to cool to ambient temperature and toluene was removed under reduced pressure to give crude product **2w** (Figure S1).

To the crude product **2w** was added  $\text{MgCl}_2$  (24 mmol, 1.2 equiv), KOH (24 mmol, 1.2 equiv, 85%+) and EtOH (120 mL) (Figure S2) and stirred well for 0.5 h (Figure S3) before 1-fluoro-4-isocyanatobenzene (**1j**) (24 mmol, 1.2 equiv) was added. Then the mixture stirred at 25 °C for 3 hours (the whole process was closely monitored by TLC). After the completion of the reaction (Figure S4), the crude reaction mixture was purified by flash silica gel column chromatography (DCM : MeOH = 30 : 1) to give **3ab** as yellow solid (7.5 g, 79%) (Figure S5).

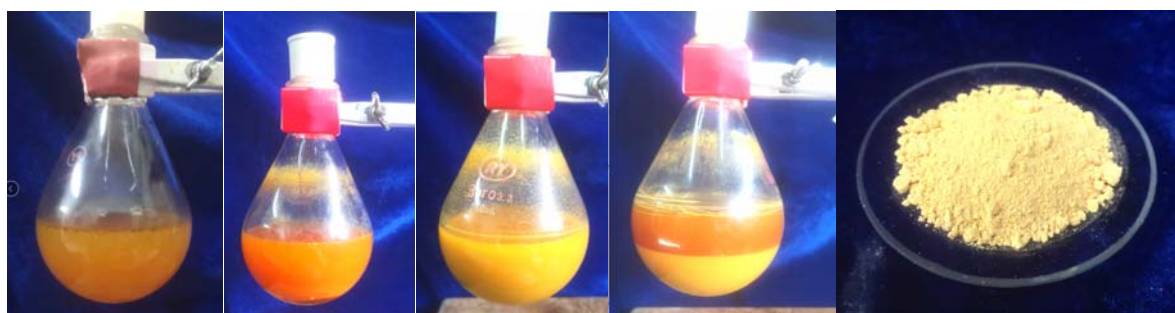

**Figure S1**

**Figure S2**

**Figure S3**

**Figure S4**

**Figure S5**

**Figure S1:** The status of the completion of the reaction.

**Figure S2:** Add  $\text{MgCl}_2$ , KOH, and EtOH.

**Figure S3:** After stirring for 0.5 h.

**Figure S4:** The status of the completion of the reaction.

**Figure S5:** Product properties

### III. Dosage Screening of MgCl<sub>2</sub>

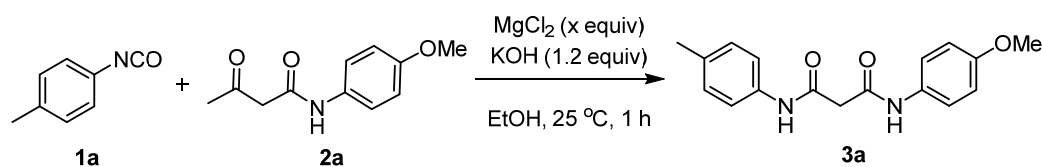

| Entry | MgCl <sub>2</sub> (x equiv) | Yield of <b>3a</b> /% |
|-------|-----------------------------|-----------------------|
| 1     | 0.2                         | 19 <sup>b</sup>       |
| 2     | 0.5                         | 45 <sup>c</sup>       |
| 3     | 1.2                         | 91 <sup>d</sup>       |

<sup>a</sup> Unless otherwise indicated, all reactions were conducted with **1a** (1.2 equiv), **2a** (0.5 mmol), KOH (1.2 equiv) in 3 mL of EtOH at 25 °C in 1 h. <sup>b</sup> 72% of **2a** was recovered. <sup>c</sup> 48% of **2a** was recovered. <sup>d</sup> Table 1, entry 1 in manuscript.

The experiment showed that 1.2 equivalent of MgCl<sub>2</sub> was necessary for the reaction, because we only got 19% and 45% product **3a**, respectively, when 0.2 and 0.5 equivalents of MgCl<sub>2</sub> were employed to the reaction, even if we prolonged the reaction time to 3 h.



#### IV. Analytical Data of Compounds

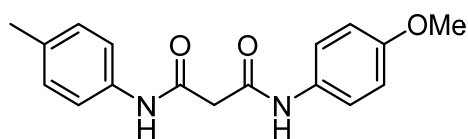

***N*<sup>1</sup>-(4-methoxyphenyl)-*N*<sup>3</sup>-(*p*-tolyl)malonamide (3a):** According to the general procedure, combining 1-isocyanato-4-methylbenzene (**1a**) and *N*-(4-methoxyphenyl)-3-oxobutanamide (**2a**) in presence of magnesium chloride and potassium hydroxide to afford **3a** as white solid (135 mg, 91%); Mp = 173-174 °C. <sup>1</sup>H NMR (600 MHz, DMSO) δ 10.06 (s, 1H), 10.01 (s, 1H), 7.50 (dd, *J* = 15.6, 8.4 Hz, 4H), 7.11 (d, *J* = 7.8 Hz, 2H), 6.89 (d, *J* = 9.0 Hz, 2H), 3.72 (s, 3H), 3.41 (s, 2H), 2.25 (s, 3H). <sup>13</sup>C NMR (151 MHz, DMSO) δ 165.7, 165.4, 155.8, 136.9, 132.7, 132.6, 129.6, 121.1, 119.6, 114.3, 55.6, 46.2, 20.9. HRMS (ESI) (*m/z*) calculated for C<sub>17</sub>H<sub>18</sub>N<sub>2</sub>NaO<sub>3</sub> [M+Na]<sup>+</sup>: 321.1210, found: 321.1201.

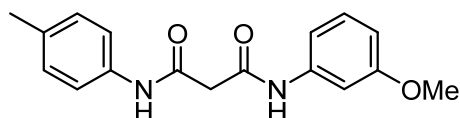

***N*<sup>1</sup>-(3-methoxyphenyl)-*N*<sup>3</sup>-(*p*-tolyl)malonamide (3b):** According to the general procedure, combining 1-isocyanato-4-methylbenzene (**1a**) and *N*-(3-methoxyphenyl)-3-oxobutanamide (**2d**) in presence of magnesium chloride and potassium hydroxide to afford **3b** as white solid (127 mg, 85%); Mp = 175-177 °C. <sup>1</sup>H NMR (600 MHz, DMSO) δ 10.16 (s, 1H), 10.08 (s, 1H), 7.49 (d, *J* = 8.4 Hz, 2H), 7.32 (s, 1H), 7.21 (t, *J* = 7.8 Hz, 1H), 7.12 (t, *J* = 8.4 Hz, 3H), 6.64 (d, *J* = 8.4 Hz, 1H), 3.73 (s, 3H), 3.45 (s, 2H), 2.25 (s, 3H). <sup>13</sup>C NMR (151 MHz, DMSO) δ 166.0, 165.6, 160.0, 140.6, 136.9, 132.8, 130.04, 129.6, 119.6, 111.8, 109.3, 105.4, 55.4, 46.4, 20.9. HRMS (ESI) (*m/z*) calculated for C<sub>17</sub>H<sub>18</sub>N<sub>2</sub>NaO<sub>3</sub> [M+Na]<sup>+</sup>: 321.1210, found: 321.1205.

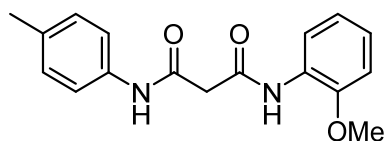

***N*<sup>1</sup>-(2-methoxyphenyl)-*N*<sup>3</sup>-(*p*-tolyl)malonamide (3c):** According to the general procedure, combining 1-isocyanato-4-methylbenzene (**1a**) and *N*-(2-methoxyphenyl)-3-oxobutanamide (**2e**) in presence of magnesium chloride and potassium hydroxide to afford **3c** as white solid (138 mg, 93%); Mp = 171-172 °C. <sup>1</sup>H NMR (400 MHz, DMSO) δ 10.12 (s, 1H), 9.68 (s, 1H), 8.10 (d, *J* = 8.0 Hz, 1H), 7.48 (d, *J* = 8.4 Hz, 2H), 7.13 (d, *J* = 8.0 Hz, 2H), 7.09 – 7.03 (m, 2H), 6.93 – 6.89 (m, 1H), 3.85 (s, 3H), 3.58 (s, 2H), 2.25 (s, 3H). <sup>13</sup>C NMR (101 MHz, DMSO) δ 166.4, 165.7, 149.4, 136.7, 133.0, 129.6, 127.7, 124.6, 121.2, 120.8, 119.8, 111.5,

56.3, 45.5, 20.9. **HRMS** (ESI) (m/z) calculated for C<sub>17</sub>H<sub>18</sub>N<sub>2</sub>NaO<sub>3</sub> [M+Na]<sup>+</sup>: 321.1210, found: 321.1209.

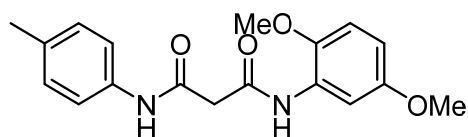

**N<sup>1</sup>-(2,5-dimethoxyphenyl)-N<sup>3</sup>-(p-tolyl)malonamide (3d)**: According to the general procedure, combining 1-isocyanato-4-methylbenzene (**1a**) and *N*-(2,5-dimethoxyphenyl)-3-oxobutanamide (**2f**) in presence of magnesium chloride and potassium hydroxide to afford **3d** as white solid (146 mg, 90%); Mp = 146-147 °C. **<sup>1</sup>H NMR** (400 MHz, DMSO) δ 10.13 (s, 1H), 9.71 (s, 1H), 7.84 (s, 1H), 7.48 (d, *J* = 8.4 Hz, 2H), 7.13 (d, *J* = 8.4 Hz, 2H), 6.96 (d, *J* = 8.8 Hz, 1H), 6.62 (dd, *J* = 8.8, 2.8 Hz, 1H), 3.80 (s, 3H), 3.68 (s, 3H), 3.59 (s, 2H), 2.25 (s, 3H). **<sup>13</sup>C NMR** (150 MHz, DMSO) δ 166.4, 165.7, 153.4, 143.4, 136.7, 133.0, 129.7, 128.6, 119.8, 112.3, 108.2, 107.7, 56.8, 55.8, 45.5, 20.9. **HRMS** (ESI) (m/z) calculated for C<sub>18</sub>H<sub>20</sub>N<sub>2</sub>NaO<sub>4</sub> [M+Na]<sup>+</sup>: 351.1315, found: 351.1307.

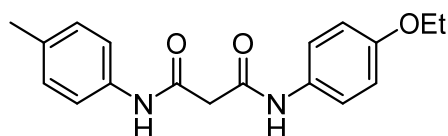

**N<sup>1</sup>-(4-ethoxyphenyl)-N<sup>3</sup>-(p-tolyl)malonamide (3e)**: According to the general procedure, combining 1-isocyanato-4-methylbenzene (**1a**) and *N*-(4-ethoxyphenyl)-3-oxobutanamide (**2g**) in presence of magnesium chloride and potassium hydroxide to afford **3e** as white solid (135 mg, 87%); Mp = 218-220 °C. **<sup>1</sup>H NMR** (400 MHz, DMSO) δ 10.05 (s, 1H), 10.00 (s, 1H), 7.51 – 7.47 (m, 4H), 7.11 (d, *J* = 8.0 Hz, 2H), 6.87 (d, *J* = 9.2 Hz, 2H), 3.98 (q, *J* = 6.8 Hz, 2H), 3.41 (s, 2H), 2.25 (s, 3H), 1.30 (t, *J* = 6.8 Hz, 3H). **<sup>13</sup>C NMR** (150 MHz, DMSO) δ 165.8, 165.4, 155.0, 137.0, 132.7, 132.5, 129.6, 121.1, 119.5, 114.9, 63.5, 46.2, 20.9, 15.2. **HRMS** (ESI) (m/z) calculated for C<sub>18</sub>H<sub>20</sub>N<sub>2</sub>NaO<sub>3</sub> [M+Na]<sup>+</sup>: 335.1366, found: 335.1360.

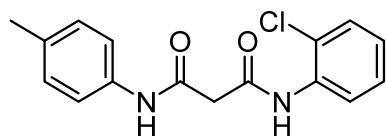

**N<sup>1</sup>-(2-chlorophenyl)-N<sup>3</sup>-(p-tolyl)malonamide (3f)**: According to the general procedure, combining 1-isocyanato-4-methylbenzene (**1a**) and *N*-(2-chlorophenyl)-3-oxobutanamide (**2h**) in presence of magnesium chloride and potassium hydroxide to afford **3f** as white solid (142 mg, 95%); Mp = 186-188 °C. **<sup>1</sup>H NMR** (400 MHz, DMSO) δ 10.15 (s, 1H), 10.03 (s, 1H), 7.97 (d, *J* = 8.4 Hz, 1H), 7.52 – 7.48 (m, 3H), 7.36 – 7.31 (m, 1H), 7.19 – 7.12 (m, 3H), 3.60 (s, 2H), 2.26 (s, 3H). **<sup>13</sup>C NMR** (151 MHz, DMSO) δ 166.2, 166.1, 136.7, 135.3, 133.1, 129.9,

129.7, 128.0, 126.2, 125.2, 124.7, 119.8, 45.0, 20.9. **HRMS** (ESI) (m/z) calculated for C<sub>16</sub>H<sub>15</sub>ClN<sub>2</sub>NaO<sub>2</sub> [M+Na]<sup>+</sup>: 325.0714, found: 325.0706.

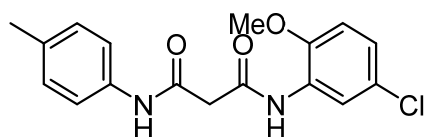

**N<sup>1</sup>-(5-chloro-2-methoxyphenyl)-N<sup>3</sup>-(p-tolyl)malonamide (3g)**: According to the general procedure, combining 1-isocyanato-4-methylbenzene (**1a**) and *N*-(5-chloro-2-methoxyphenyl)-3-oxobutanamide (**2i**) in presence of magnesium chloride and potassium hydroxide to afford **3g** as white solid (150 mg, 91%); Mp = 189-190 °C. **<sup>1</sup>H NMR** (400 MHz, DMSO) δ 10.13 (s, 1H), 9.88 (s, 1H), 8.22 (d, *J* = 2.0 Hz, 1H), 7.47 (d, *J* = 8.0 Hz, 2H), 7.14 – 7.06 (m, 4H), 3.87 (s, 3H), 3.61 (s, 2H), 2.26 (s, 3H). **<sup>13</sup>C NMR** (101 MHz, DMSO) δ 166.3, 166.2, 148.0, 136.7, 133.0, 129.7, 129.0, 124.4, 123.7, 120.1, 119.8, 112.9, 56.8, 45.3, 20.9. **HRMS** (ESI) (m/z) calculated for C<sub>17</sub>H<sub>17</sub>ClN<sub>2</sub>NaO<sub>3</sub> [M+Na]<sup>+</sup>: 355.0820, found: 355.0811.

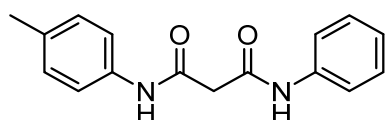

**N<sup>1</sup>-phenyl-N<sup>3</sup>-(p-tolyl)malonamide (3h)**: According to the general procedure, combining 1-isocyanato-4-methylbenzene (**1a**) and 3-oxo-*N*-phenylbutanamide (**2j**) in presence of magnesium chloride and potassium hydroxide to afford **3h** as white solid (123 mg, 92%); Mp = 224-227 °C. **<sup>1</sup>H NMR** (400 MHz, DMSO) δ 10.15 (s, 1H), 10.07 (s, 1H), 7.60 (d, *J* = 8.0 Hz, 2H), 7.49 (d, *J* = 8.4 Hz, 2H), 7.31 (t, *J* = 7.6 Hz, 2H), 7.11 (d, *J* = 8.0 Hz, 2H), 7.05 (t, *J* = 7.6 Hz, 1H), 3.45 (s, 2H), 2.25 (s, 3H). **<sup>13</sup>C NMR** (151 MHz, DMSO) δ 165.9, 165.7, 139.5, 136.9, 132.8, 129.6, 129.2, 123.9, 119.6, 119.5, 46.4, 20.9. **HRMS** (ESI) (m/z) calculated for C<sub>16</sub>H<sub>16</sub>N<sub>2</sub>NaO<sub>2</sub> [M+Na]<sup>+</sup>: 291.1104, found: 291.1103.

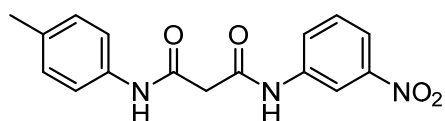

**N<sup>1</sup>-(3-nitrophenyl)-N<sup>3</sup>-(p-tolyl)malonamide (3i)** : According to the general procedure, combining 1-isocyanato-4-methylbenzene (**1a**) and *N*-(3-nitrophenyl)-3-oxobutanamide (**2k**) in presence of magnesium chloride and potassium hydroxide to afford **3i** as light yellow solid (117 mg, 75%); Mp = 196-197 °C. **<sup>1</sup>H NMR** (600 MHz, DMSO) δ 10.70 (s, 1H), 10.13 (s, 1H), 8.65 (s, 1H), 7.94 – 7.91 (m, 2H), 7.63 (t, *J* = 8.4 Hz, 1H), 7.49 (d, *J* = 7.8 Hz, 2H), 7.12 (d, *J* = 8.4 Hz, 2H), 3.51 (s, 2H), 2.25 (s, 3H). **<sup>13</sup>C NMR** (151 MHz, DMSO) δ 166.8, 165.3, 148.5, 140.5, 136.9, 132.9, 130.7, 129.6, 125.5, 119.6, 118.4, 113.6, 46.5, 20.9. **HRMS** (ESI) (m/z) calculated for C<sub>16</sub>H<sub>15</sub>N<sub>3</sub>NaO<sub>4</sub> [M+Na]<sup>+</sup>: 336.0955, found: 336.0953.

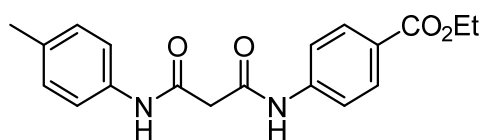

**ethyl 4-(3-oxo-3-(*p*-tolylamino)propanamido)benzoate (3j):** According to the general procedure, combining 1-isocyanato-4-methylbenzene (**1a**) and ethyl 4-(3-oxobutanamido)benzoate (**2l**) in presence of magnesium chloride and potassium hydroxide to afford **3j** as white solid (133 mg, 79%); Mp = 195-196 °C. <sup>1</sup>H NMR (400 MHz, DMSO) δ 10.51 (s, 1H), 10.09 (s, 1H), 7.93 (d, *J* = 8.4 Hz, 2H), 7.74 (d, *J* = 8.8 Hz, 2H), 7.48 (d, *J* = 8.4 Hz, 2H), 7.12 (d, *J* = 8.4 Hz, 2H), 4.28 (q, *J* = 7.2 Hz, 2H), 3.50 (s, 2H), 2.25 (s, 3H), 1.31 (t, *J* = 7.2 Hz, 3H). <sup>13</sup>C NMR (101 MHz, DMSO) δ 166.6, 165.8, 165.4, 143.7, 136.9, 132.8, 130.8, 129.6, 124.9, 119.6, 118.9, 60.9, 46.5, 20.9, 14.7. HRMS (ESI) (*m/z*) calculated for C<sub>19</sub>H<sub>20</sub>N<sub>2</sub>NaO<sub>4</sub> [M+Na]<sup>+</sup>: 363.1315, found: 363.1313.

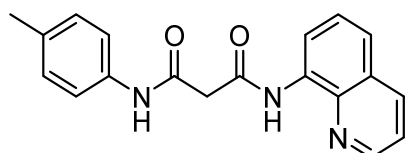

**N<sup>1</sup>-(quinolin-8-yl)-N<sup>3</sup>-(*p*-tolyl)malonamide (3k):** According to the general procedure, combining 1-isocyanato-4-methylbenzene (**1a**) and 3-oxo-*N*-(quinolin-8-yl)butanamide (**2m**) in presence of magnesium chloride and potassium hydroxide to afford **3k** as white solid (101 mg, 63%); Mp = 172-173 °C. <sup>1</sup>H NMR (400 MHz, DMSO) δ 10.94 (s, 1H), 10.24 (s, 1H), 8.96 – 8.94 (m, 1H), 8.69 (d, *J* = 7.6 Hz, 1H), 8.41 – 8.39 (m, 1H), 7.68 – 7.62 (m, 2H), 7.58 (t, *J* = 8.0 Hz, 1H), 7.53 – 7.50 (m, 2H), 7.14 (d, *J* = 8.4 Hz, 2H), 3.77 (s, 2H), 2.25 (s, 3H). <sup>13</sup>C NMR (151 MHz, DMSO) δ 166.3, 166.0, 149.5, 138.6, 137.0, 136.7, 134.9, 133.1, 129.7, 128.3, 127.4, 122.6, 122.5, 119.9, 116.9, 46.2, 20.9. HRMS (ESI) (*m/z*) calculated for C<sub>19</sub>H<sub>17</sub>N<sub>3</sub>NaO<sub>2</sub> [M+Na]<sup>+</sup>: 342.1213, found: 342.1208.

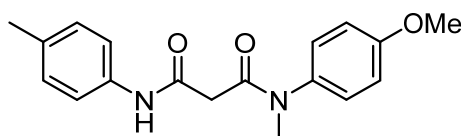

Na<sup>+</sup>

**N<sup>1</sup>-(4-methoxyphenyl)-N<sup>1</sup>-methyl-N<sup>3</sup>-(*p*-tolyl)malonamide (3l):** According to the general procedure, combining 1-isocyanato-4-methylbenzene (**1a**) and *N*-(4-methoxyphenyl)-*N*-methyl-3-oxobutanamide (**2n**) in presence of magnesium chloride and potassium hydroxide to afford **3l** as white solid (131 mg, 84%); Mp = 136-137 °C. <sup>1</sup>H NMR (400 MHz, DMSO) δ 9.78 (s, 1H), 7.38 (d, *J* = 8.4 Hz, 2H), 7.29 (d, *J* = 8.8 Hz, 2H), 7.08 (d, *J* = 8.4 Hz, 2H), 6.98 (d, *J* = 8.8 Hz, 2H), 3.75 (s, 3H), 3.15 (s, 3H), 3.14 (s, 2H), 2.24 (s, 3H). <sup>13</sup>C NMR (151 MHz,

DMSO)  $\delta$  167.3, 165.6, 158.9, 136.9, 136.7, 132.6, 129.5, 129.0, 119.5, 115.2, 55.8, 43.5, 37.5, 20.9. **HRMS** (ESI) (m/z) calculated for  $C_{18}H_{20}N_2NaO_3$   $[M+Na]^+$ : 335.1366, found: 335.1362.

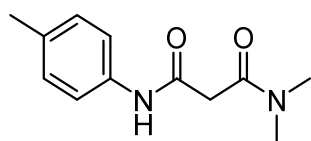

***N*<sup>1</sup>,*N*<sup>1</sup>-dimethyl-*N*<sup>3</sup>-(*p*-tolyl)malonamide (3m)**: According to the general procedure, combining 1-isocyanato-4-methylbenzene (**1a**) and *N,N*-dimethyl-3-oxobutanamide (**2o**) in presence of magnesium chloride and potassium hydroxide to afford **3m** as white solid (101 mg, 92%); Mp = 105-106 °C. **<sup>1</sup>H NMR** (400 MHz, DMSO)  $\delta$  10.02 (s, 1H), 7.46 (d,  $J$  = 8.4 Hz, 2H), 7.10 (d,  $J$  = 8.4 Hz, 2H), 3.46 (s, 2H), 3.01 (s, 3H), 2.84 (s, 3H), 2.24 (s, 3H). **<sup>13</sup>C NMR** (101 MHz, DMSO)  $\delta$  167.6, 165.8, 137.1, 132.6, 129.6, 119.5, 43.2, 37.8, 35.4, 20.9. **HRMS** (ESI) (m/z) calculated for  $C_{12}H_{16}N_2NaO_2$   $[M+Na]^+$ : 243.1104, found: 243.1101.

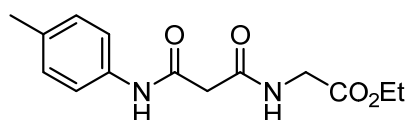

**ethyl (3-oxo-3-(*p*-tolylamino)propanoyl)glycinate (3n)**: According to the general procedure, combining 1-isocyanato-4-methylbenzene (**1a**) and ethyl (3-oxobutanoyl)glycinate (**2p**) in presence of magnesium chloride and potassium hydroxide to afford **3n** as white solid (131 mg, 95%); Mp = 107-108 °C. **<sup>1</sup>H NMR** (400 MHz, DMSO)  $\delta$  9.99 (s, 1H), 8.48 (t,  $J$  = 5.6 Hz, 1H), 7.46 (d,  $J$  = 8.0 Hz, 2H), 7.10 (d,  $J$  = 7.6 Hz, 2H), 4.09 (qd,  $J$  = 7.2, 1.6 Hz, 2H), 3.88 (d,  $J$  = 5.6 Hz, 2H), 3.30 (s, 2H), 2.24 (s, 3H), 1.19 (td,  $J$  = 7.2, 1.6 Hz, 3H). **<sup>13</sup>C NMR** (151 MHz, DMSO)  $\delta$  170.2, 167.6, 165.6, 136.9, 132.8, 129.6, 119.6, 60.9, 44.7, 41.3, 20.9, 14.5. **HRMS** (ESI) (m/z) calculated for  $C_{14}H_{18}N_2NaO_4$   $[M+Na]^+$ : 301.1159, found: 301.1154.

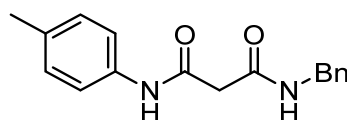

***N*<sup>1</sup>-benzyl-*N*<sup>3</sup>-(*p*-tolyl)malonamide (3o)**: According to the general procedure, combining 1-isocyanato-4-methylbenzene (**1a**) and *N*-benzyl-3-oxobutanamide (**2q**) in presence of magnesium chloride and potassium hydroxide to afford **3o** as white solid (132 mg, 94%); Mp = 184-185 °C. **<sup>1</sup>H NMR** (400 MHz, DMSO)  $\delta$  10.02 (s, 1H), 8.55 (t,  $J$  = 5.6 Hz, 1H), 7.47 (d,  $J$  = 8.4 Hz, 2H), 7.34 – 7.28 (m, 4H), 7.26 – 7.22 (m, 1H), 7.11 (d,  $J$  = 8.4 Hz, 2H), 4.31 (d,  $J$  = 6.0 Hz, 2H), 3.29 (s, 2H), 2.25 (s, 3H). **<sup>13</sup>C NMR** (151 MHz, DMSO)  $\delta$  167.1, 165.9, 139.6, 136.9, 132.7, 129.6, 128.8, 127.7, 127.3, 119.6, 45.1, 42.7, 20.9. **HRMS** (ESI) (m/z) calculated for  $C_{17}H_{18}N_2NaO_2$   $[M+Na]^+$ : 305.1260, found: 305.1256.

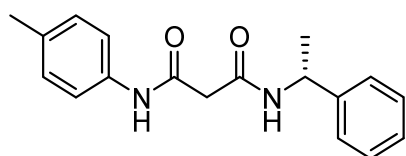

**(R)-N<sup>1</sup>-(1-phenylethyl)-N<sup>3</sup>-(p-tolyl)malonamide (3p)**: According to the general procedure, combining 1-isocyanato-4-methylbenzene (**1a**) and (R)-3-oxo-*N*-(1-phenylethyl)butanamide (**2r**) in presence of magnesium chloride and potassium hydroxide to afford **3p** as white solid (136 mg, 92%); Mp = 176-177 °C. <sup>1</sup>H NMR (400 MHz, DMSO) δ 9.99 (s, 1H), 8.52 (d, *J* = 8.0 Hz, 1H), 7.46 (d, *J* = 8.0 Hz, 2H), 7.35 – 7.30 (m, 4H), 7.24 – 7.20 (m, 1H), 7.10 (d, *J* = 8.0 Hz, 2H), 4.93 (p, *J* = 7.2 Hz, 1H), 3.27 (s, 2H), 2.24 (s, 3H), 1.37 (d, *J* = 7.2 Hz, 3H). <sup>13</sup>C NMR (151 MHz, DMSO) δ 166.2, 165.9, 144.8, 136.9, 132.7, 129.6, 128.7, 127.1, 126.5, 119.5, 48.6, 45.1, 23.0, 20.9. HRMS (ESI) (*m/z*) calculated for C<sub>18</sub>H<sub>20</sub>N<sub>2</sub>NaO<sub>2</sub> [M+Na]<sup>+</sup>: 319.1417, found: 319.1413.

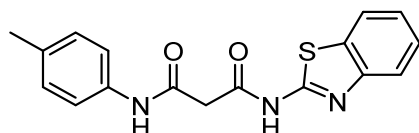

**N<sup>1</sup>-(benzo[d]thiazol-2-yl)-N<sup>3</sup>-(p-tolyl)malonamide (3q)**: According to the general procedure, combining 1-isocyanato-4-methylbenzene (**1a**) and *N*-(benzo[d]thiazol-2-yl)-3-oxobutanamide (**2s**) in presence of magnesium chloride and potassium hydroxide to afford **3q** as White solid (153 mg, 94%); Mp = 259-261 °C. <sup>1</sup>H NMR (600 MHz, DMSO) δ 12.42 (s, 1H), 10.16 (s, 1H), 7.99 (d, *J* = 7.8 Hz, 1H), 7.76 (d, *J* = 8.4 Hz, 1H), 7.48 (d, *J* = 8.4 Hz, 2H), 7.44 (t, *J* = 7.8 Hz, 1H), 7.32 (t, *J* = 7.8 Hz, 1H), 7.13 (d, *J* = 8.4 Hz, 2H), 3.65 (s, 2H), 2.26 (s, 3H). <sup>13</sup>C NMR (101 MHz, DMSO) δ 167.1, 164.8, 158.2, 149.0, 136.8, 132.9, 131.9, 129.7, 126.6, 124.1, 122.2, 121.1, 119.6, 45.2, 20.9. HRMS (ESI) (*m/z*) calculated for C<sub>17</sub>H<sub>15</sub>N<sub>3</sub>NaO<sub>2</sub>S [M+Na]<sup>+</sup>: 348.0777, found: 348.0773.

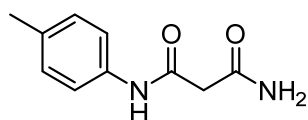

**N<sup>1</sup>-(p-tolyl)malonamide (3r)**: According to the general procedure, combining 1-isocyanato-4-methylbenzene (**1a**) and 3-oxobutanamide (**2t**) in presence of magnesium chloride and potassium hydroxide to afford **3r** as white solid (68 mg, 68%); Mp = 99-101 °C. <sup>1</sup>H NMR (600 MHz, DMSO) δ 9.98 (s, 1H), 7.49 (s, 1H), 7.46 (d, *J* = 8.4 Hz, 2H), 7.10 (d, *J* = 8.4 Hz, 3H), 3.19 (s, 2H), 2.24 (s, 3H). <sup>13</sup>C NMR (101 MHz, DMSO) δ 169.2, 166.0, 137.0, 132.7, 129.6, 119.5, 44.9, 20.9. HRMS (ESI) (*m/z*) calculated for C<sub>10</sub>H<sub>12</sub>N<sub>2</sub>NaO<sub>2</sub> [M+Na]<sup>+</sup>: 215.0791, found: 215.0783.

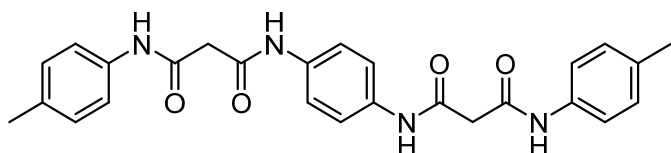

***N*<sup>1</sup>,*N*<sup>1'</sup>-(1,4-phenylene)bis(*N*<sup>3</sup>-(*p*-tolyl)malonamide) (3s):** According to the general procedure, combining isocyanatocyclohexane (**1a**) and *N,N'*-(1,4-phenylene)bis(3-oxobutanamide) (**2u**) in presence of magnesium chloride and potassium hydroxide to afford **3s** as white solid (8.59 g, 94%); Mp >320 °C. <sup>1</sup>H NMR (400 MHz, DMSO) δ 10.12 (s, 2H), 10.06 (s, 2H), 7.54 (s, 4H), 7.48 (d, *J* = 8.4 Hz, 4H), 7.11 (d, *J* = 8.4 Hz, 4H), 3.43 (s, 4H), 2.25 (s, 6H). <sup>13</sup>C NMR (151 MHz, DMSO) δ 165.7, 165.7, 137.0, 135.0, 132.8, 129.6, 120.0, 119.6, 46.3, 20.9. HRMS (ESI) (*m/z*) calculated for C<sub>26</sub>H<sub>26</sub>N<sub>4</sub>NaO<sub>4</sub> [*M*+Na]<sup>+</sup>: 481.1846, found: 481.1841.

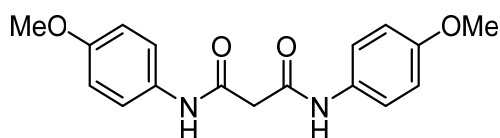

***N*<sup>1</sup>,*N*<sup>3</sup>-bis(4-methoxyphenyl)malonamide (3t):** According to the general procedure, combining 1-isocyanato-4-methoxybenzene (**1b**) and *N*-(4-methoxyphenyl)-3-oxobutanamide (**2a**) in presence of magnesium chloride and potassium hydroxide to afford **3t** as white solid (149 mg, 95%); Mp = 230-232 °C. <sup>1</sup>H NMR (600 MHz, DMSO) δ 10.01 (s, 2H), 7.51 (d, *J* = 8.8 Hz, 4H), 6.90 – 6.87 (m, 4H), 3.72 (s, 6H), 3.40 (s, 2H). <sup>13</sup>C NMR (151 MHz, DMSO) δ 165.5, 155.7, 132.6, 121.1, 114.3, 55.6, 46.1. HRMS (ESI) (*m/z*) calculated for C<sub>17</sub>H<sub>18</sub>N<sub>2</sub>NaO<sub>4</sub> [*M*+Na]<sup>+</sup>: 337.1159, found: 337.1159.

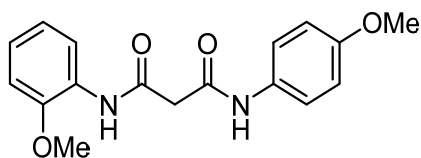

***N*<sup>1</sup>-(2-methoxyphenyl)-*N*<sup>3</sup>-(4-methoxyphenyl)malonamide (3u):** According to the general procedure, combining 1-isocyanato-3-methoxybenzene (**1c**) and *N*-(4-methoxyphenyl)-3-oxobutanamide (**2a**) in presence of magnesium chloride and potassium hydroxide to afford **3u** as white solid (141 mg, 90%); Mp = 120-122 °C. <sup>1</sup>H NMR (600 MHz, DMSO) δ 10.08 (s, 1H), 9.70 (s, 1H), 8.10 (d, *J* = 7.8 Hz, 1H), 7.51 (d, *J* = 9.0 Hz, 2H), 7.08 – 7.04 (m, 2H), 6.92 – 6.89 (m, 3H), 3.85 (s, 3H), 3.72 (s, 3H), 3.56 (s, 2H). <sup>13</sup>C NMR (151 MHz, DMSO) δ 166.2, 165.7, 155.9, 149.3, 132.3, 127.8, 124.6, 121.4, 121.1, 120.8, 114.4, 111.5, 56.3, 55.6, 45.3. HRMS (ESI) (*m/z*) calculated for C<sub>17</sub>H<sub>18</sub>N<sub>2</sub>NaO<sub>4</sub> [*M*+Na]<sup>+</sup>: 337.1159, found: 337.1153.

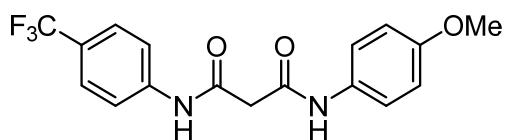

***N*<sup>1</sup>-(4-methoxyphenyl)-*N*<sup>3</sup>-(4-(trifluoromethyl)phenyl)malonamide (3v)**: According to the general procedure, combining 1-isocyanato-4-(trifluoromethyl)benzene (**1d**) and *N*-(4-methoxyphenyl)-3-oxobutanamide (**2a**) in presence of magnesium chloride and potassium hydroxide to afford **3v** as white solid (150 mg, 85%); Mp = 233-234 °C. <sup>1</sup>H NMR (600 MHz, DMSO) δ 10.53 (s, 1H), 10.05 (s, 1H), 7.82 (d, *J* = 8.4 Hz, 2H), 7.69 (d, *J* = 8.4 Hz, 2H), 7.51 (d, *J* = 9.0 Hz, 2H), 6.89 (d, *J* = 9.0 Hz, 2H), 3.72 (s, 3H), 3.48 (s, 2H). <sup>19</sup>F NMR (565 MHz, DMSO) δ -60.32. <sup>13</sup>C NMR (101 MHz, DMSO) δ 166.7, 165.1, 155.8, 143.0, 132.6, 126.6 (q, *J*<sub>C-F</sub> = 3.4 Hz), 124.8 (q, *J*<sub>C-F</sub> = 269.4 Hz), 123.9 (q, *J*<sub>C-F</sub> = 31.8 Hz), 121.1, 119.5, 114.4, 55.6, 46.3. HRMS (ESI) (*m/z*) calculated for C<sub>17</sub>H<sub>15</sub>F<sub>3</sub>N<sub>2</sub>NaO<sub>3</sub> [M+Na]<sup>+</sup>: 375.0927, found: 375.0925.

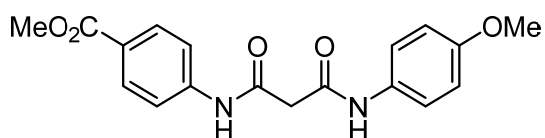

**methyl 4-(3-((4-methoxyphenyl)amino)-3-oxopropanamido)benzoate (3w)**: According to the general procedure, combining methyl 4-isocyanatobenzoate (**1e**) and *N*-(4-methoxyphenyl)-3-oxobutanamide (**2a**) in presence of magnesium chloride and potassium hydroxide to afford **3w** as white solid (151 mg, 89%); Mp = 202-203 °C. <sup>1</sup>H NMR (600 MHz, DMSO) δ 10.51 (s, 1H), 10.05 (s, 1H), 7.93 (d, *J* = 8.4 Hz, 2H), 7.75 (d, *J* = 8.4 Hz, 2H), 7.51 (d, *J* = 8.4 Hz, 2H), 6.89 (d, *J* = 9.0 Hz, 2H), 3.82 (s, 3H), 3.72 (s, 3H), 3.49 (s, 2H). <sup>13</sup>C NMR (151 MHz, DMSO) δ 166.6, 166.3, 165.1, 155.8, 143.8, 132.6, 130.8, 124.6, 121.1, 118.9, 114.4, 55.6, 52.4, 46.4. HRMS (ESI) (*m/z*) calculated for C<sub>18</sub>H<sub>18</sub>N<sub>2</sub>NaO<sub>5</sub> [M+Na]<sup>+</sup>: 365.1108, found: 365.1101.

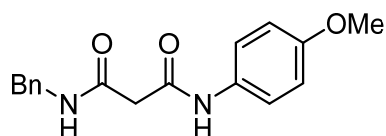

***N*<sup>1</sup>-benzyl-*N*<sup>3</sup>-(4-methoxyphenyl)malonamide (3x)**: According to the general procedure, combining methyl (isocyanatomethyl)benzene (**1f**) and *N*-(4-methoxyphenyl)-3-oxobutanamide (**2a**) in presence of magnesium chloride and potassium hydroxide to afford **3x** as white solid (145 mg, 97%); Mp = 148-149 °C. <sup>1</sup>H NMR (400 MHz, DMSO) δ 9.98 (s, 1H), 8.56 (t, *J* = 5.6 Hz, 1H), 7.51 (d, *J* = 8.8 Hz, 2H), 7.35 – 7.29 (m, 4H), 7.26 – 7.22 (m, 1H), 6.89 (d, *J* = 8.8 Hz, 2H), 4.32 (d, *J* = 6.0 Hz, 2H), 3.72 (s, 3H), 3.29 (s, 2H). <sup>13</sup>C NMR (151



MHz, DMSO)  $\delta$  167.2, 165.7, 155.7, 139.7, 132.6, 128.8, 127.7, 127.3, 121.1, 114.3, 55.6, 45.0, 42.7. **HRMS** (ESI) (m/z) calculated for C<sub>17</sub>H<sub>18</sub>N<sub>2</sub>NaO<sub>3</sub> [M+Na]<sup>+</sup>: 321.1210, found: 321.1204.

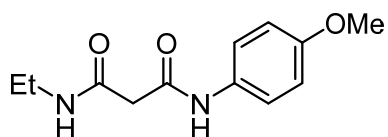

**N<sup>1</sup>-ethyl-N<sup>3</sup>-(4-methoxyphenyl)malonamide (3y)**: According to the general procedure, combining isocyanatoethane (**1g**) and *N*-(4-methoxyphenyl)-3-oxobutanamide (**2a**) in presence of magnesium chloride and potassium hydroxide to afford **3y** as white solid (100 mg, 85%); Mp = 151-153 °C. **<sup>1</sup>H NMR** (400 MHz, DMSO)  $\delta$  9.94 (s, 1H), 8.03 (s, 1H), 7.48 (d, *J* = 8.8 Hz, 2H), 6.88 (d, *J* = 9.2 Hz, 2H), 3.72 (s, 3H), 3.18 (s, 2H), 3.14 – 3.07 (m, 2H), 1.03 (t, *J* = 7.2 Hz, 3H). **<sup>13</sup>C NMR** (101 MHz, DMSO)  $\delta$  166.8, 165.7, 155.7, 132.6, 121.0, 114.3, 55.6, 44.9, 34.1, 15.1. **HRMS** (ESI) (m/z) calculated for C<sub>12</sub>H<sub>16</sub>N<sub>2</sub>NaO<sub>3</sub> [M+Na]<sup>+</sup>: 259.1053, found: 259.1046.

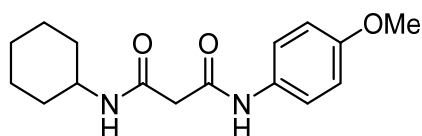

**N<sup>1</sup>-cyclohexyl-N<sup>3</sup>-(4-methoxyphenyl)malonamide (3z)**: According to the general procedure, combining isocyanatocyclohexane (**1h**) and *N*-(4-methoxyphenyl)-3-oxobutanamide (**2a**) in presence of magnesium chloride and potassium hydroxide to afford **3z** as white solid (127 mg, 87%); Mp = 162-163 °C. **<sup>1</sup>H NMR** (600 MHz, DMSO)  $\delta$  9.92 (s, 1H), 7.93 (d, *J* = 7.8 Hz, 1H), 7.48 (d, *J* = 8.4 Hz, 2H), 6.87 (d, *J* = 7.2 Hz, 2H), 3.71 (s, 3H), 3.56 – 3.53 (m, 1H), 3.17 (s, 2H), 1.74 (d, *J* = 10.2 Hz, 2H), 1.67 (d, *J* = 13.2 Hz, 2H), 1.54 (d, *J* = 12.0 Hz, 1H), 1.29 – 1.23 (m, 2H), 1.19 – 1.13 (m, 3H). **<sup>13</sup>C NMR** (151 MHz, DMSO)  $\delta$  166.1, 165.8, 155.7, 132.6, 121.0, 114.3, 55.6, 48.1, 44.9, 32.8, 25.7, 24.9. **HRMS** (ESI) (m/z) calculated for C<sub>16</sub>H<sub>22</sub>N<sub>2</sub>NaO<sub>3</sub> [M+Na]<sup>+</sup>: 313.1523, found: 313.1514.

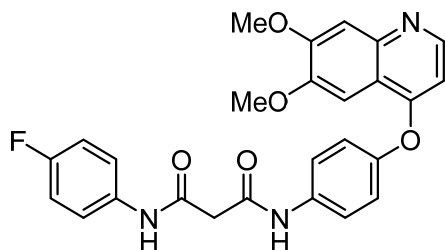

**N<sup>1</sup>-(4-((6,7-dimethoxyquinolin-4-yl)oxy)phenyl)-N<sup>3</sup>-(4-fluorophenyl)malonamide(3ab)**: According to the general procedure, combining 1-fluoro-4-isocyanatobenzene (**1j**) and *N*-(4-((6,7-dimethoxyquinolin-4-yl)oxy)phenyl)-3-oxobutanamide (**2w**) in presence of

magnesium chloride and potassium hydroxide to afford **3ad** as yellow solid (206 mg, 87%); Mp = 119-121 °C. <sup>1</sup>H NMR (400 MHz, DMSO) δ 10.36 (s, 1H), 10.28 (s, 1H), 8.46 (d, *J* = 5.2 Hz, 1H), 7.76 (d, *J* = 9.2 Hz, 2H), 7.66 – 7.62 (m, 2H), 7.51 (s, 1H), 7.39 (s, 1H), 7.25 (d, *J* = 8.8 Hz, 2H), 7.17 (t, *J* = 8.8 Hz, 2H), 6.45 (d, *J* = 5.2 Hz, 1H), 3.94 (s, 3H), 3.93 (s, 3H), 3.50 (s, 2H). <sup>19</sup>F NMR (376 MHz, DMSO) δ -119.17 (s). <sup>13</sup>C NMR (151 MHz, DMSO) δ 165.8, 165.8, 160.4, 158.5 (d, *J*<sub>C-F</sub> = 239.9 Hz), 153.0, 149.8, 149.8, 149.3, 146.9, 137.0, 135.9, 122.0, 121.3 (d, *J*<sub>C-F</sub> = 7.9 Hz), 121.3, 115.8 (d, *J*<sub>C-F</sub> = 22.2 Hz), 115.6, 108.3, 103.5, 99.6, 56.2, 56.2, 46.2. HRMS (ESI) (*m/z*) calculated for C<sub>26</sub>H<sub>23</sub>FN<sub>3</sub>O<sub>5</sub> [M+H]<sup>+</sup>: 476.1616, found: 476.1611.

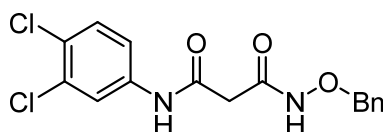

**N<sup>1</sup>-(benzyloxy)-N<sup>3</sup>-(3,4-dichlorophenyl)malonamide (3ac)**: According to the general procedure, combining 1,2-dichloro-4-isocyanatobenzene (**1k**) and *N*-(benzyloxy)-3-oxobutanamide (**2x**) in presence of magnesium chloride and potassium hydroxide to afford **3ac** as white solid (107 mg, 61%); Mp = 117-119 °C. <sup>1</sup>H NMR (400 MHz, DMSO) δ 11.24 (s, 1H), 10.43 (s, 1H), 7.98 (d, *J* = 2.4 Hz, 1H), 7.57 (d, *J* = 8.8 Hz, 1H), 7.48 (dd, *J* = 8.8, 2.4 Hz, 1H), 7.42 – 7.34 (m, 5H), 4.82 (s, 2H), 3.16 (s, 2H). <sup>13</sup>C NMR (101 MHz, DMSO) δ 166.0, 163.8, 139.4, 136.4, 131.5, 131.2, 129.3, 128.8, 128.8, 125.4, 120.8, 119.6, 77.4, 42.6. HRMS (ESI) (*m/z*) calculated for C<sub>16</sub>H<sub>14</sub>Cl<sub>2</sub>N<sub>2</sub>NaO<sub>3</sub> [M+Na]<sup>+</sup>: 375.0274, found: 375.0270.

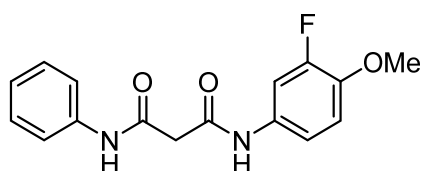

**N<sup>1</sup>-(3-fluoro-4-methoxyphenyl)-N<sup>3</sup>-phenylmalonamide (3ad)**: According to the general procedure, combining isocyanatobenzene (**1l**) and *N*-(3-fluoro-4-methoxyphenyl)-3-oxobutanamide (**2y**) in presence of magnesium chloride and potassium hydroxide to afford **3ad** as white solid (137 mg, 90%); Mp = 182-184 °C. <sup>1</sup>H NMR (400 MHz, DMSO) δ 10.20 (s, 1H), 10.16 (s, 1H), 7.62-7.58 (m, 3H), 7.31 (t, *J* = 7.6 Hz, 2H), 7.28 – 7.25 (m, 1H), 7.12 (t, *J* = 9.6 Hz, 1H), 7.06 (t, *J* = 7.2 Hz, 1H), 3.80 (s, 3H), 3.45 (s, 2H). <sup>19</sup>F NMR (376 MHz, DMSO) δ -133.82. <sup>13</sup>C NMR (101 MHz, DMSO) δ 165.8, 165.7, 151.3 (d, *J*<sub>C-F</sub> = 242.3 Hz), 143.5 (d, *J*<sub>C-F</sub> = 10.8 Hz), 139.4, 132.9 (d, *J*<sub>C-F</sub> = 9.4 Hz), 129.2, 123.9, 119.5, 115.5 (d, *J*<sub>C-F</sub> = 3.4 Hz), 114.6 (d, *J*<sub>C-F</sub> = 2.6 Hz), 108.0 (d, *J*<sub>C-F</sub> = 22.6 Hz), 56.6, 46.3. HRMS (ESI) (*m/z*) calculated for C<sub>16</sub>H<sub>15</sub>FN<sub>2</sub>NaO<sub>3</sub> [M+Na]<sup>+</sup>: 325.0959, found: 325.0954.

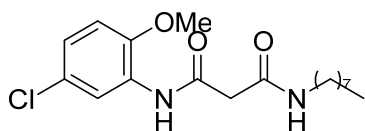

***N*<sup>1</sup>-(5-chloro-2-methoxyphenyl)-*N*<sup>3</sup>-octylmalonamide (3ae):** According to the general procedure to afford **3ae** as white solid (170 mg, 96%); Mp = 45-46 °C. <sup>1</sup>H NMR (400 MHz, DMSO) δ 10.08 (s, 1H), 8.24 (d, *J* = 2.4 Hz, 1H), 8.17 (t, *J* = 5.2 Hz, 1H), 7.10 – 6.04 (m, 2H), 3.85 (s, 3H), 3.36 (s, 2H), 3.08 (q, *J* = 2.8 Hz, 2H), 1.41 (t, *J* = 6.4 Hz, 2H), 1.24 (s, 10H), 0.84 (t, *J* = 6.8 Hz, 3H). <sup>13</sup>C NMR (101 MHz, DMSO) δ 167.7, 166.2, 147.8, 129.1, 124.5, 123.5, 119.7, 112.8, 56.7, 43.9, 39.2, 31.7, 29.3, 29.2, 29.1, 26.8, 22.5, 14.4. HRMS (ESI) (*m/z*) calculated for C<sub>18</sub>H<sub>27</sub>ClN<sub>2</sub>NaO<sub>3</sub> [M+Na]<sup>+</sup>: 377.1602, found: 377.1592.

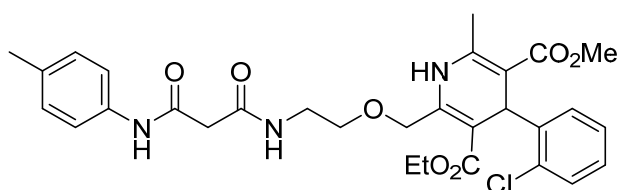

**3-ethyl 5-methyl 4-(2-chlorophenyl)-6-methyl-2-((2-(3-oxo-3-(*p*-tolylamino)propanamido)ethoxy)methyl)-1,4-dihydropyridine-3,5-dicarboxylate (3af):** According to the general procedure to afford **3af** as white solid (281 mg, 96%); Mp = 188-190 °C. <sup>1</sup>H NMR (600 MHz, DMSO) δ 10.01 (s, 1H), 8.43 (s, 1H), 8.25 (t, *J* = 5.4 Hz, 1H), 7.46 (d, *J* = 8.4 Hz, 2H), 7.34 (d, *J* = 7.8 Hz, 1H), 7.26 (d, *J* = 7.8 Hz, 1H), 7.21 (t, *J* = 7.8 Hz, 1H), 7.12–7.08 (m, 3H), 5.30 (s, 1H), 4.60 (dd, *J* = 51.0, 13.8 Hz, 2H), 4.00 – 3.90 (m, 2H), 3.54 – 3.50 (m, 5H), 3.35 – 3.34 (m, 2H), 3.27 (s, 2H), 2.28 (s, 3H), 2.24 (s, 3H), 1.10 (t, *J* = 7.2 Hz, 3H). <sup>13</sup>C NMR (151 MHz, DMSO) δ 167.6, 167.4, 166.8, 165.918, 146.3, 145.938, 145.4, 136.9, 132.7, 131.6, 131.5, 129.6, 129.4, 128.2, 127.9, 119.5, 102.8, 102.2, 69.7, 66.9, 59.9, 51.0, 45.1, 39.1, 37.2, 20.9, 18.7, 14.6. HRMS (ESI) (*m/z*) calculated for C<sub>30</sub>H<sub>34</sub>ClN<sub>3</sub>NaO<sub>7</sub> [M+Na]<sup>+</sup>: 606.1977, found: 606.1967.

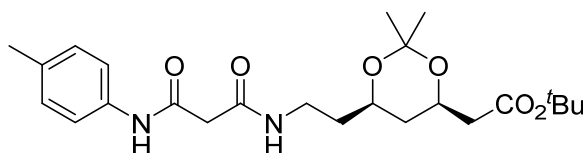

***tert*-butyl 2-((4*R*,6*R*)-2,2-dimethyl-6-(2-(3-oxo-3-(*p*-tolylamino)propanamido)ethyl)-1,3-dioxan-4-yl)acetate (3ag):** According to the general procedure to afford **3ag** as colorless oil (199 mg, 89%). <sup>1</sup>H NMR (600 MHz, DMSO) δ 9.99 (s, 1H), 8.00 (t, *J* = 5.4 Hz, 1H), 7.46 (d, *J* = 8.4 Hz, 2H), 7.10 (d, *J* = 7.8 Hz, 2H), 4.19 – 4.15 (m, 1H), 3.94 – 3.90 (m, 1H), 3.20 (s, 2H), 3.15 – 3.11 (m, 2H), 2.35 (dd, *J* = 15.0, 4.8 Hz, 1H), 2.24 (s, 3H), 2.21 (dd, *J* = 15.0, 7.8 Hz, 1H), 1.55 – 1.50 (m, 3H), 1.39 (s, 9H), 1.37 (s, 3H), 1.24 (s, 3H), 1.05 (dd, *J* = 24.0, 12.0

Hz, 1H).  $^{13}\text{C}$  NMR (151 MHz, DMSO)  $\delta$  170.1, 166.9, 165.9, 136.9, 132.7, 129.6, 119.5, 98.6, 80.2, 66.8, 66.5, 45.1, 42.7, 36.2, 36.0, 35.5, 30.4, 28.2, 20.9, 20.1. HRMS (ESI) (m/z) calculated for  $\text{C}_{24}\text{H}_{36}\text{N}_2\text{NaO}_6$   $[\text{M}+\text{Na}]^+$ : 471.2466, found: 471.2452.

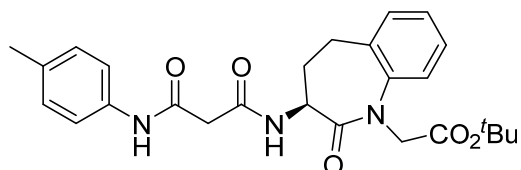

**tert-butyl (S)-2-(2-oxo-3-(3-oxo-3-(p-tolylamino)propanamido)-2,3,4,5-tetrahydro-1H-benzo[b]azepin-1-yl)acetate (3ah):** According to the general procedure to afford **3ah** as white solid (214 mg, 92%); Mp = 94-96 °C.  $^1\text{H}$  NMR (600 MHz, DMSO)  $\delta$  9.90 (s, 1H), 8.48 (s, 1H), 7.44 (d,  $J = 7.2$  Hz, 2H), 7.36 – 7.32 (m, 3H), 7.23 (t,  $J = 7.2$  Hz, 1H), 7.09 (d,  $J = 7.8$  Hz, 2H), 4.58 (d,  $J = 17.4$  Hz, 1H), 4.35 (d,  $J = 17.4$  Hz, 1H), 4.28 (s, 1H), 3.27 – 3.20 (m, 3H), 2.65 (dd,  $J = 13.2, 6.6$  Hz, 1H), 2.27 (d,  $J = 7.8$  Hz, 1H), 2.24 (s, 3H), 2.05 – 1.99 (m, 1H), 1.36 (s, 9H).  $^{13}\text{C}$  NMR (151 MHz, DMSO)  $\delta$  171.1, 168.4, 166.5, 165.7, 141.3, 136.8, 135.8, 132.7, 129.8, 129.6, 128.3, 127.1, 123.3, 119.6, 81.7, 51.3, 49.5, 44.6, 35.5, 28.1, 27.9, 20.9. HRMS (ESI) (m/z) calculated for  $\text{C}_{26}\text{H}_{31}\text{N}_3\text{NaO}_5$   $[\text{M}+\text{Na}]^+$ : 488.2156, found: 488.2146.

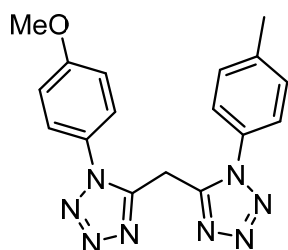

**1-(4-methoxyphenyl)-5-((1-(p-tolyl)-1H-tetrazol-5-yl)methyl)-1H-tetrazole (5):**<sup>4</sup> Phosphorus oxychloride (1.53 g, 10 mmol) and  $\text{NaN}_3$  (0.195 g, 3 mmol) were added to a vigorously stirred solution of amide **3a** (0.298 g, 1 mmol) in 3 mL of acetonitrile. The mixture was refluxed for 8 h (the whole process was closely monitored by TLC). After the completion of the reaction, (the whole process was closely monitored by TLC). After the completion of the reaction, acetonitrile was evaporated, the residue was dissolved in water with ice, and the solution was neutralized with saturated soda solution. The precipitate that formed was filtered off. Liquid tetrazoles were extracted with methylene chloride, and the solvent was evaporated in a vacuum. The crude reaction mixture was purified by flash silica gel column chromatography. (PE : EA = 3 : 1) as eluent to give **5** as a yellow oil (184 mg, 53%).  $^1\text{H}$  NMR (600 MHz,  $\text{CDCl}_3$ )  $\delta$  7.47 – 7.45 (m, 2H), 7.42 (d,  $J = 8.4$  Hz, 2H), 7.36 (d,  $J = 8.4$  Hz, 2H), 7.05 – 7.03 (m, 2H), 4.47 (s, 2H), 3.88 (s, 3H), 2.45 (s, 3H).  $^{13}\text{C}$  NMR (101 MHz,  $\text{CDCl}_3$ )  $\delta$  161.4, 149.8, 149.7, 141.6, 130.7, 130.4, 126.8, 125.5, 125.0, 115.2, 55.8, 21.3, 19.2.

**HRMS** (ESI) (m/z) calculated for  $C_{17}H_{16}N_8NaO$   $[M+Na]^+$ : 371.1339, found: 371.1335.

## V. References

- (1) Tao, P.; Li, W.-L.; Zhang, J.; Guo, S.; Zhao, Q.; Wang, H.; Wei, B.; Liu, S.-J.; Zhou, X.-H.; Yu, Q.; Xu, B.-S.; Huang, W. *Adv. Funct. Mater.* **2016**, *26*, 881.
- (2) Maiti, A.; Reddy, P. V. N.; Sturdy, M.; Marler, L.; Pegan, S. D.; Mesecar, A. D.; Pezzuto, J. M.; Cushman, M. *J. Med. Chem.* **2009**, *52*, 1873.
- (3) Hudlicky, T.; Gillman, G.; Andersen, Catherine. *Tetrahedron Asymm.* **1992**, *3*, 281.
- (4) Pokhodylo, N. T.; Shyyka, O. Ya.; Obushak, M. D. *Russ. J. Org. Chem.* **2020**, *56*, 802.

# VI. <sup>1</sup>H and <sup>13</sup>C NMR Spectra

## Compound 3a

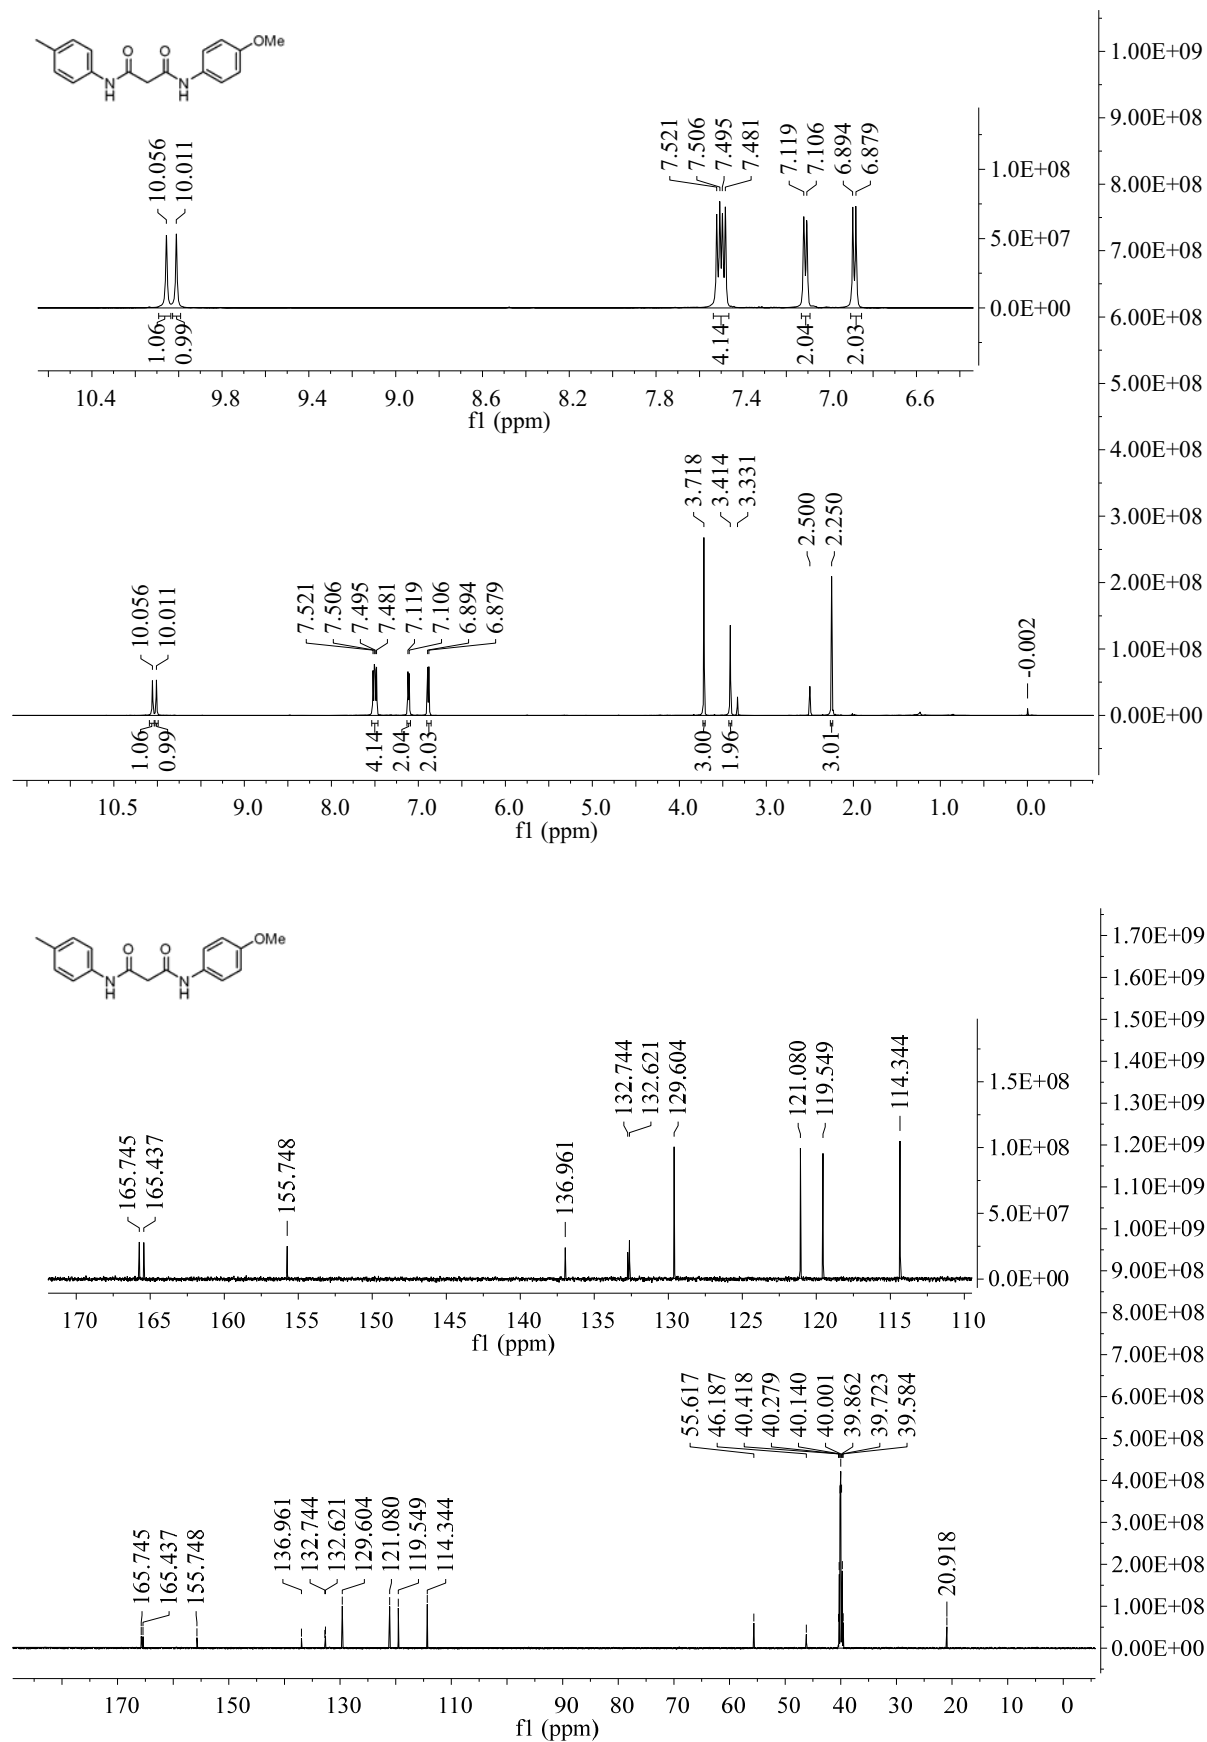

Compound 3b

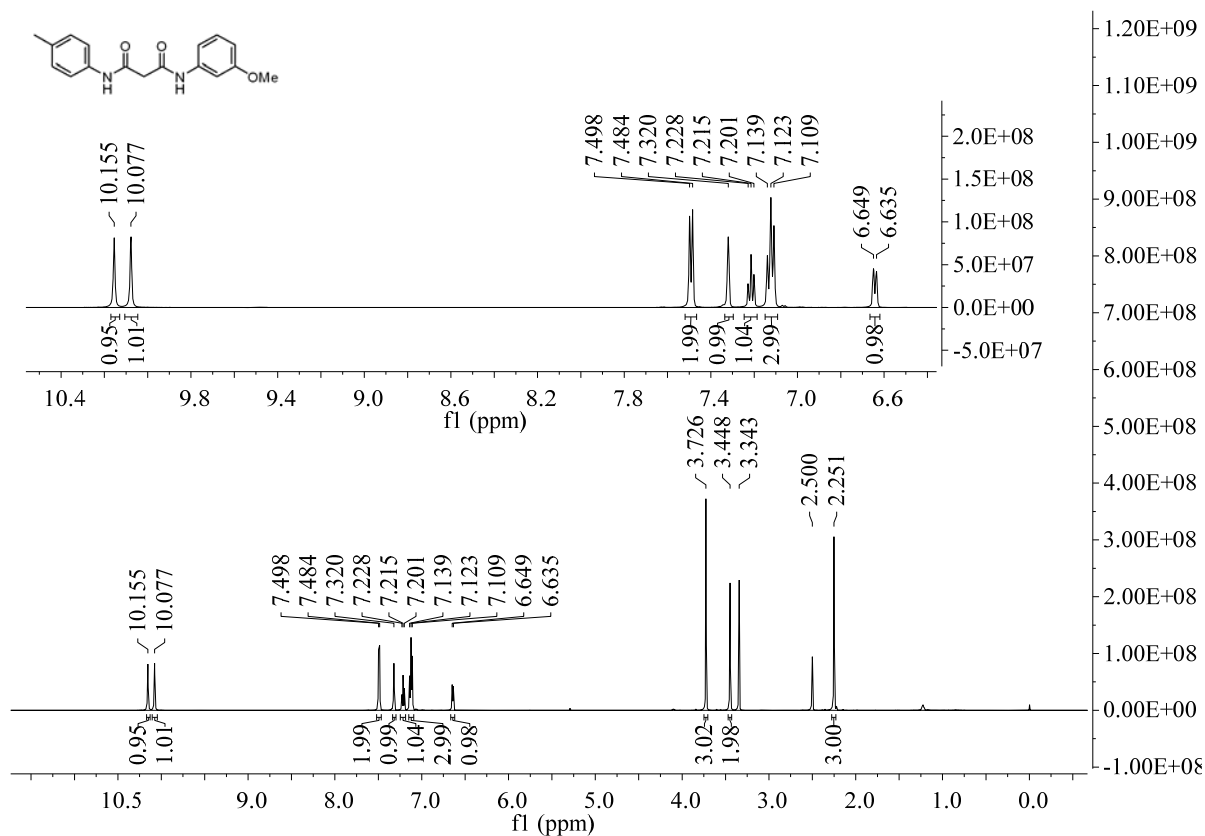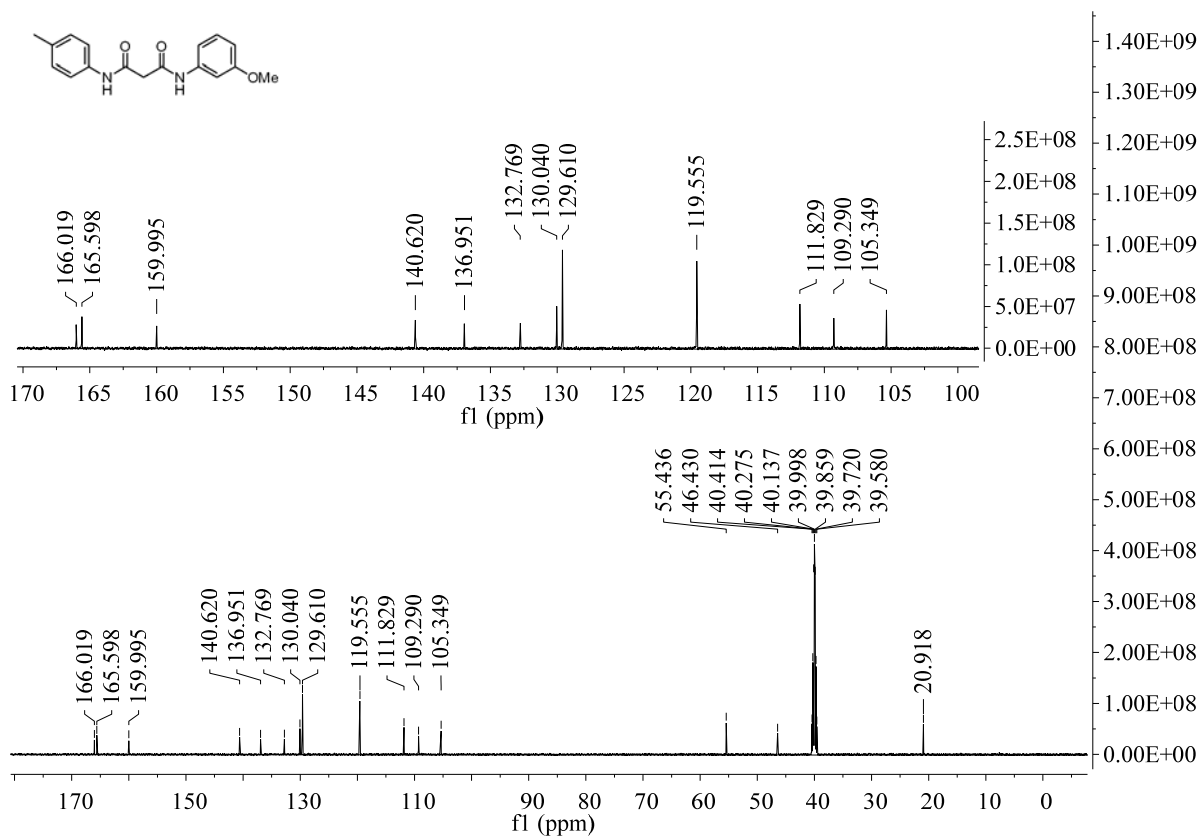



Compound 3c

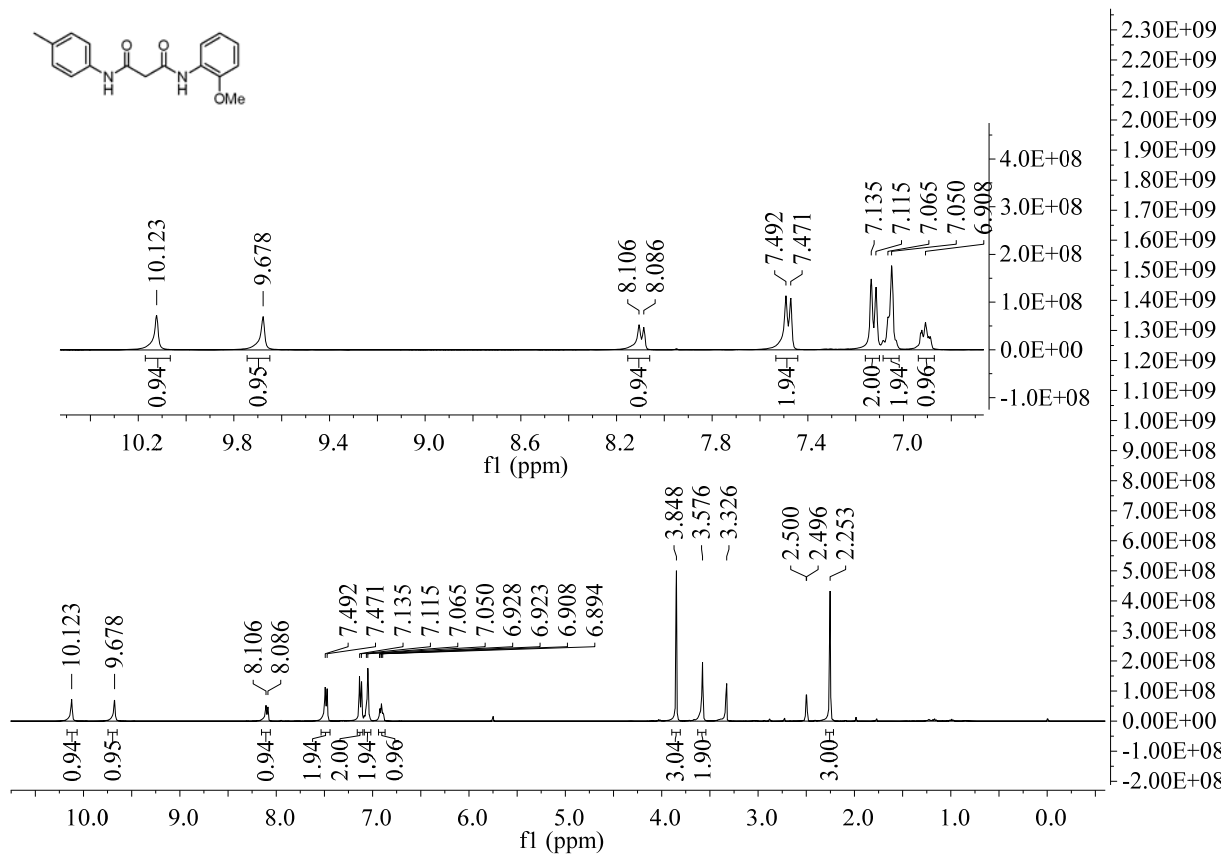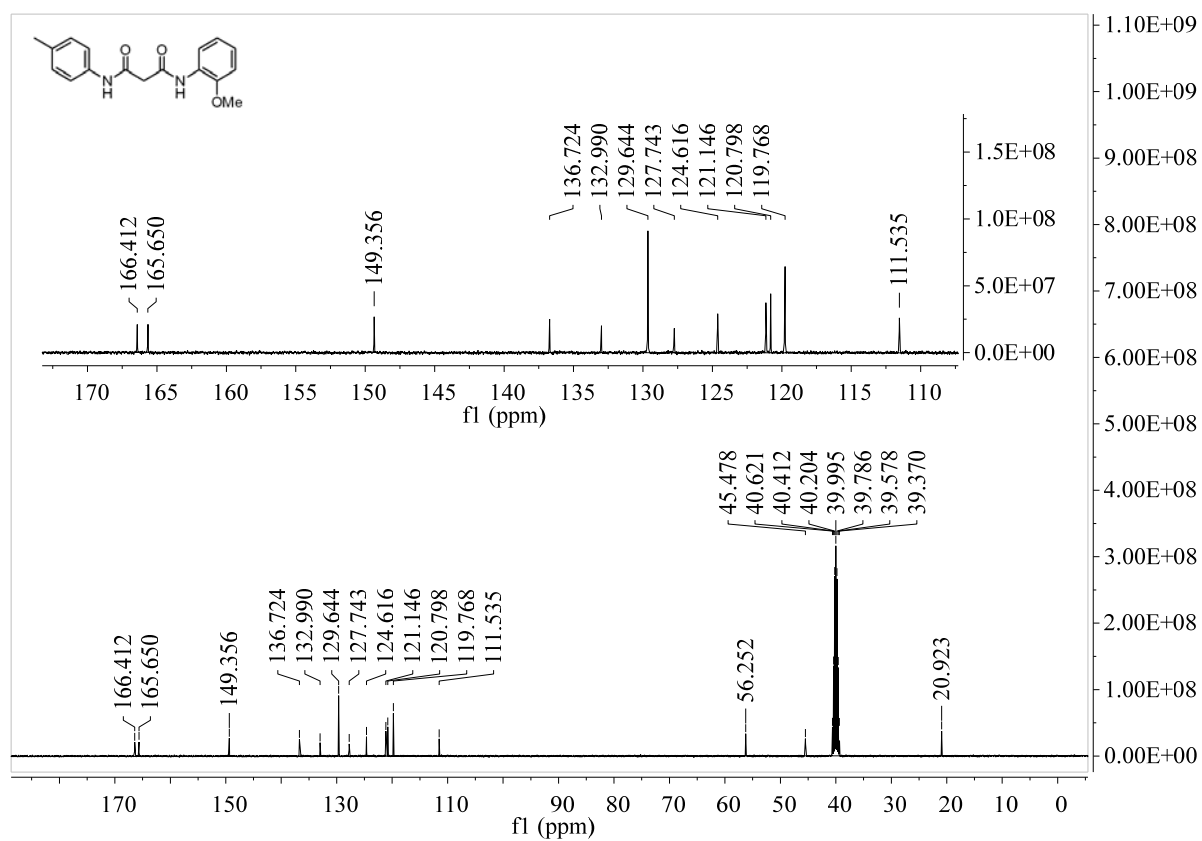

# Compound 3d

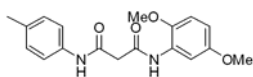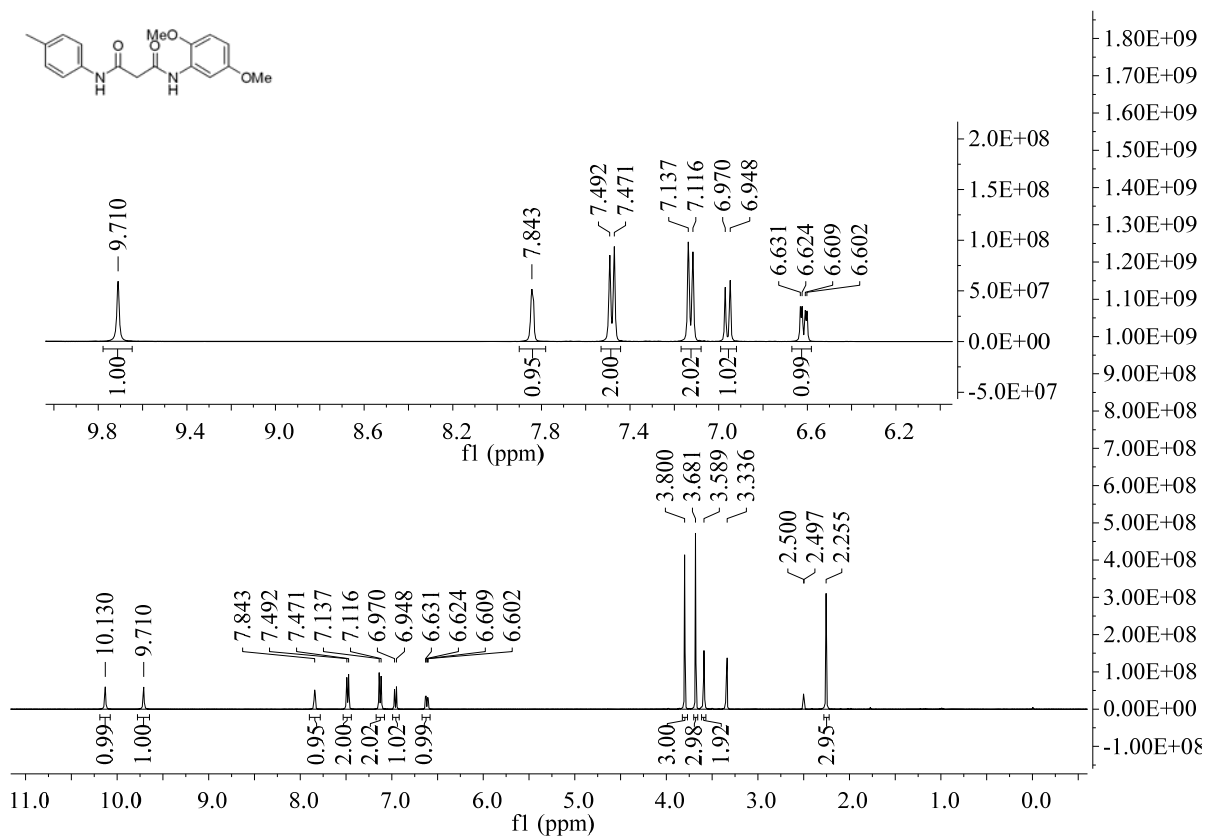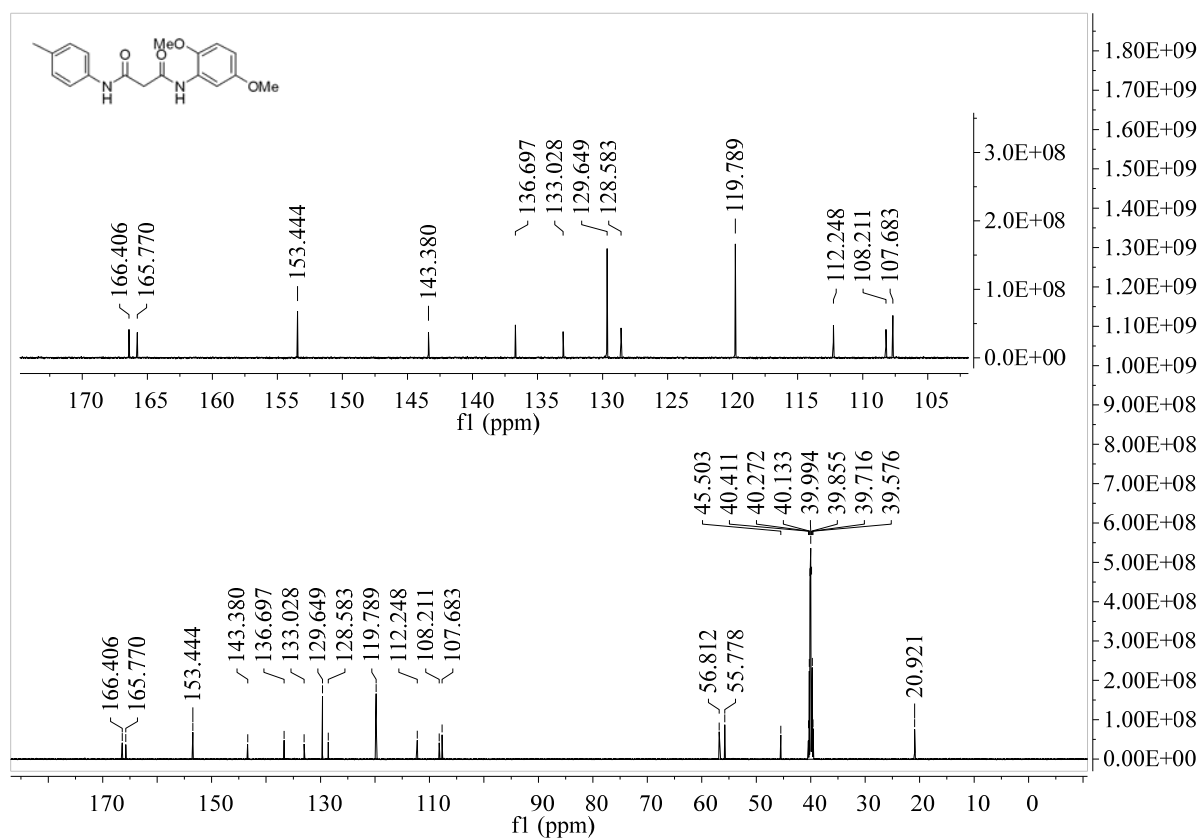

Compound 3e

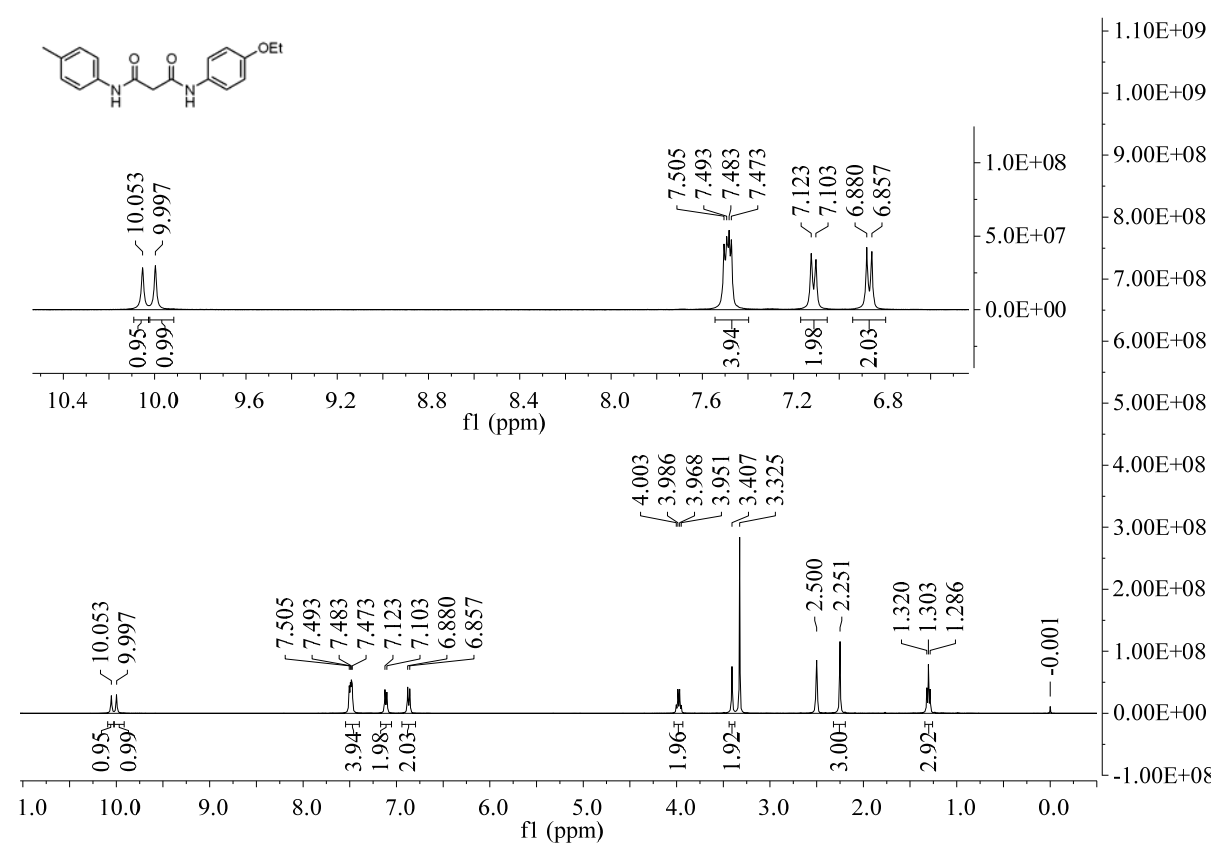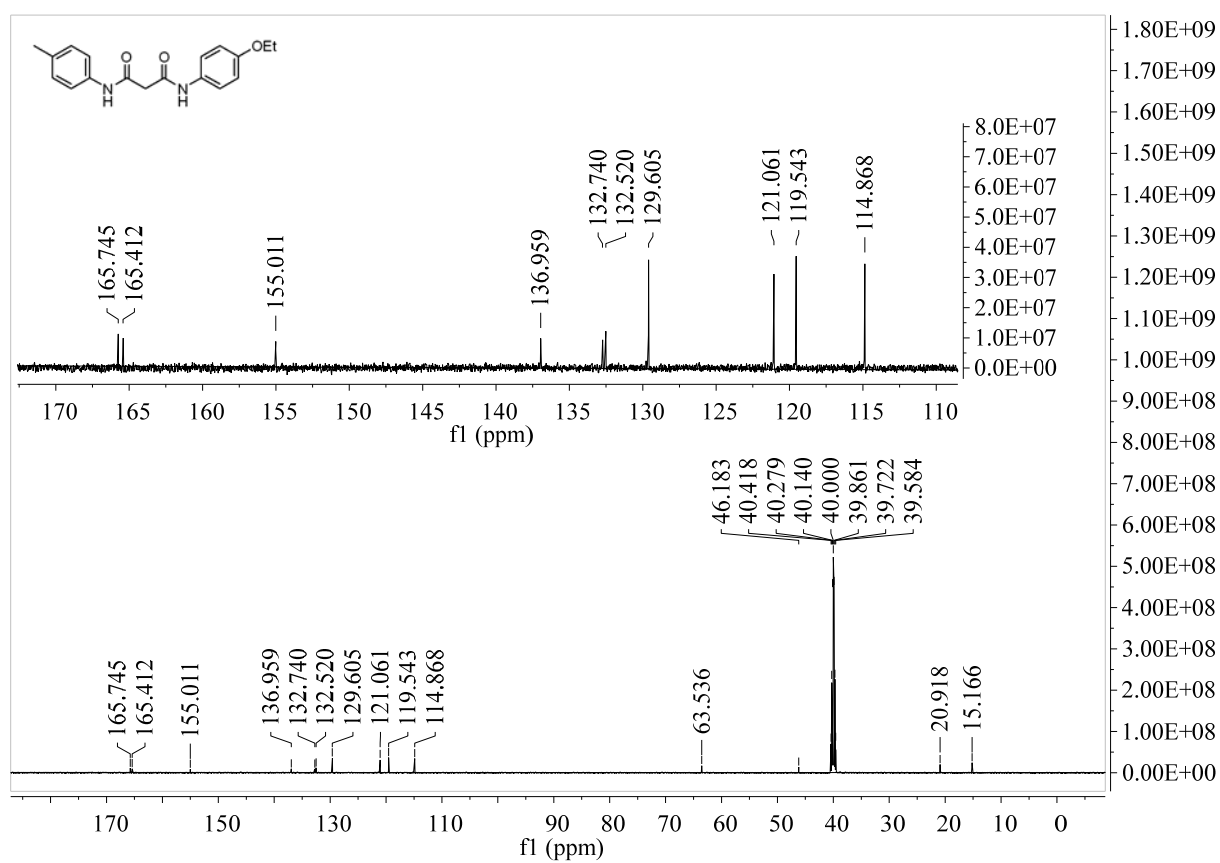

Compound 3f

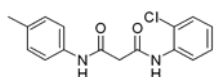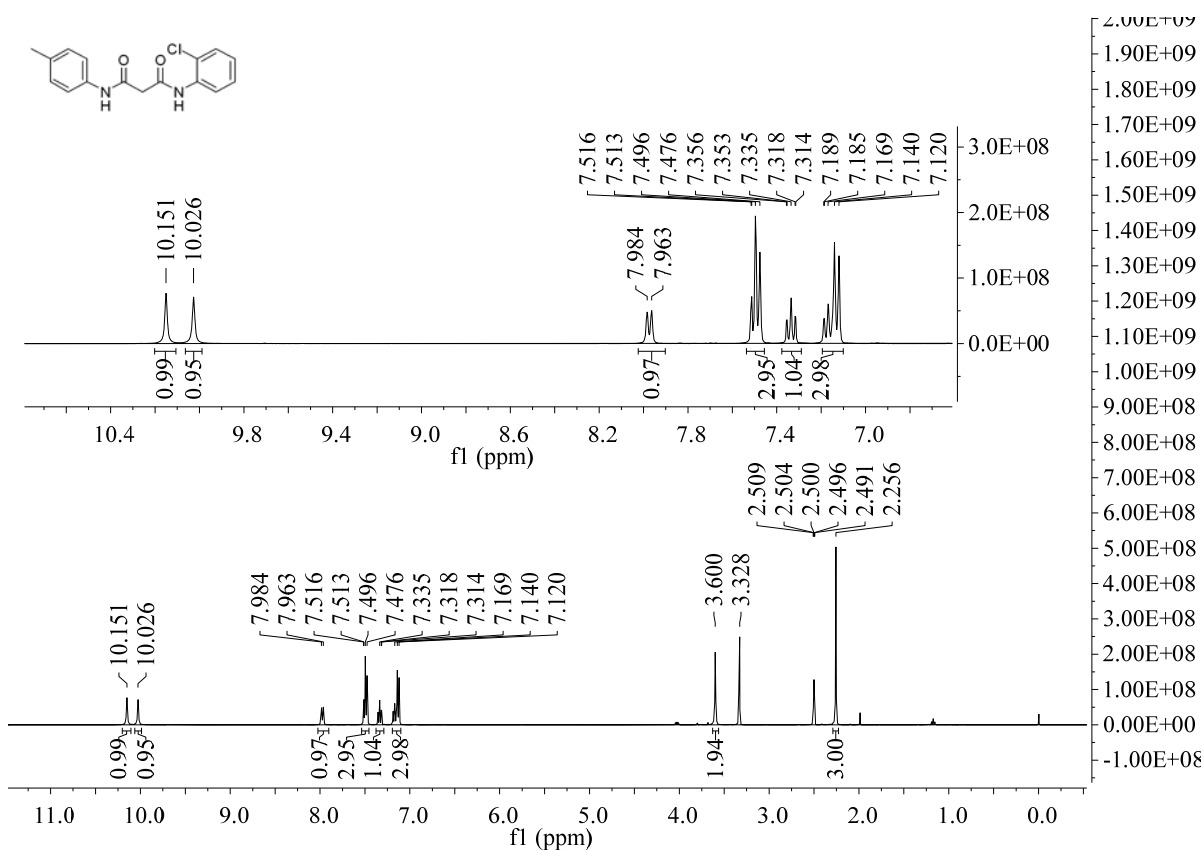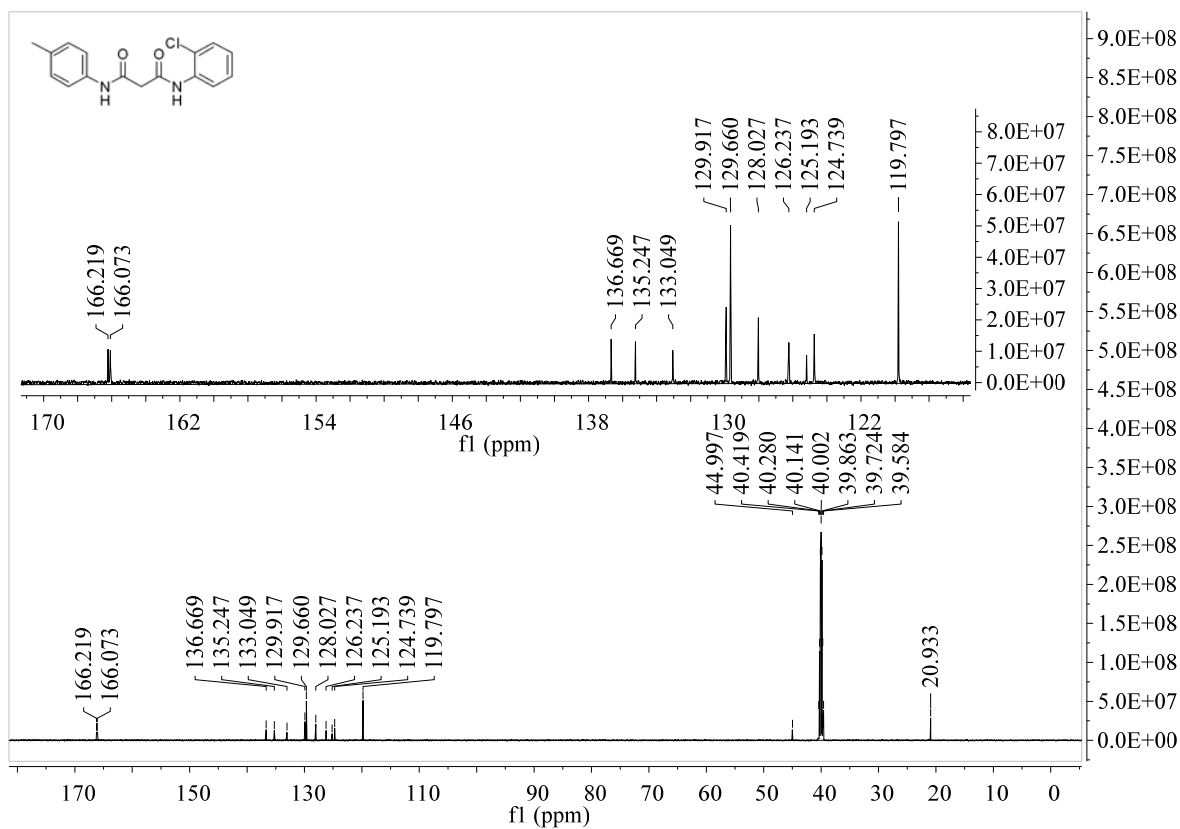

Compound 3g

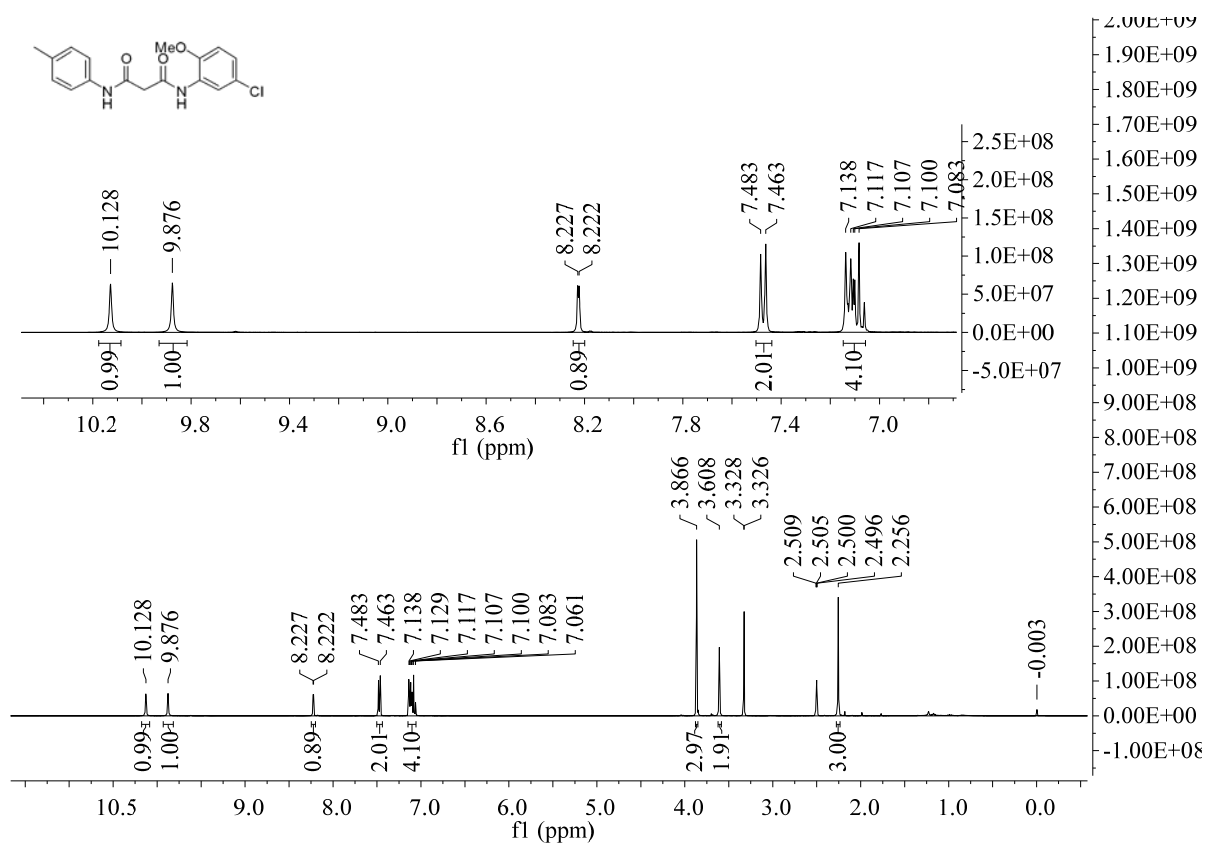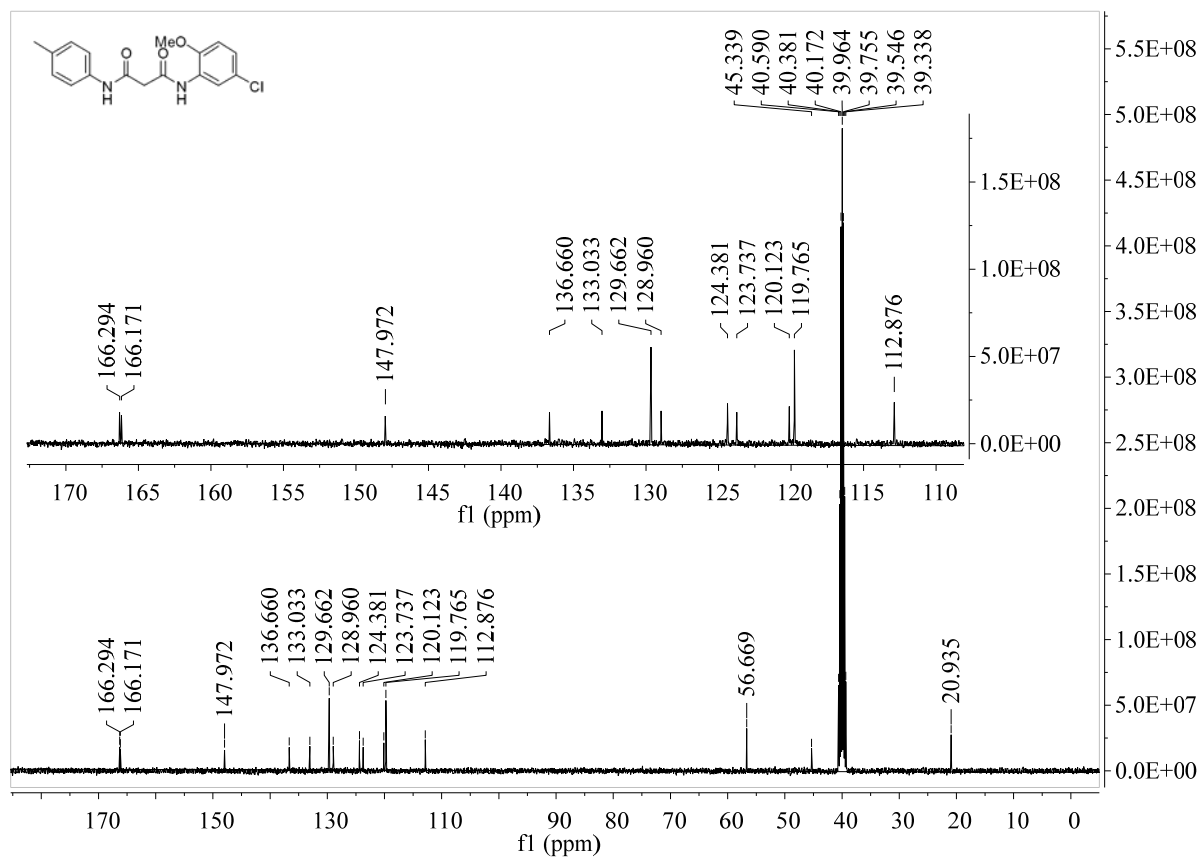

Compound 3h

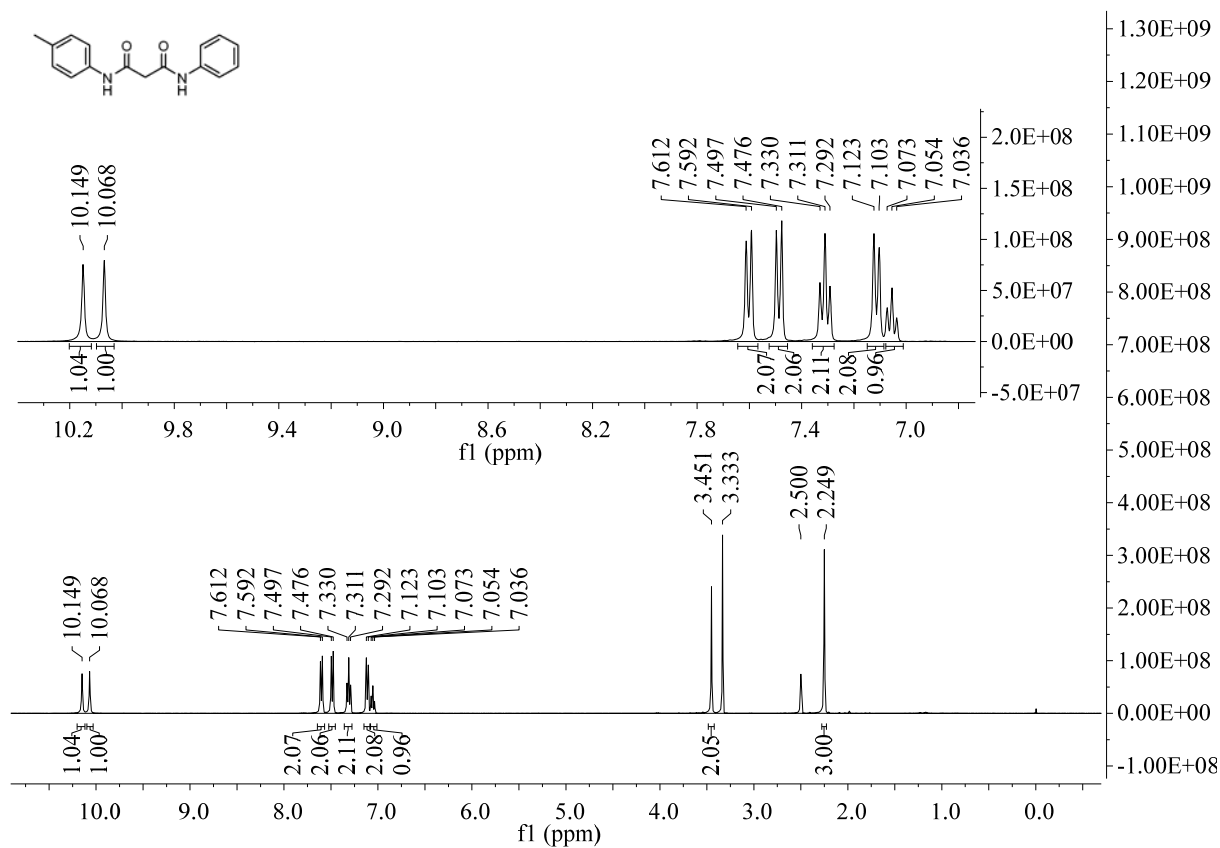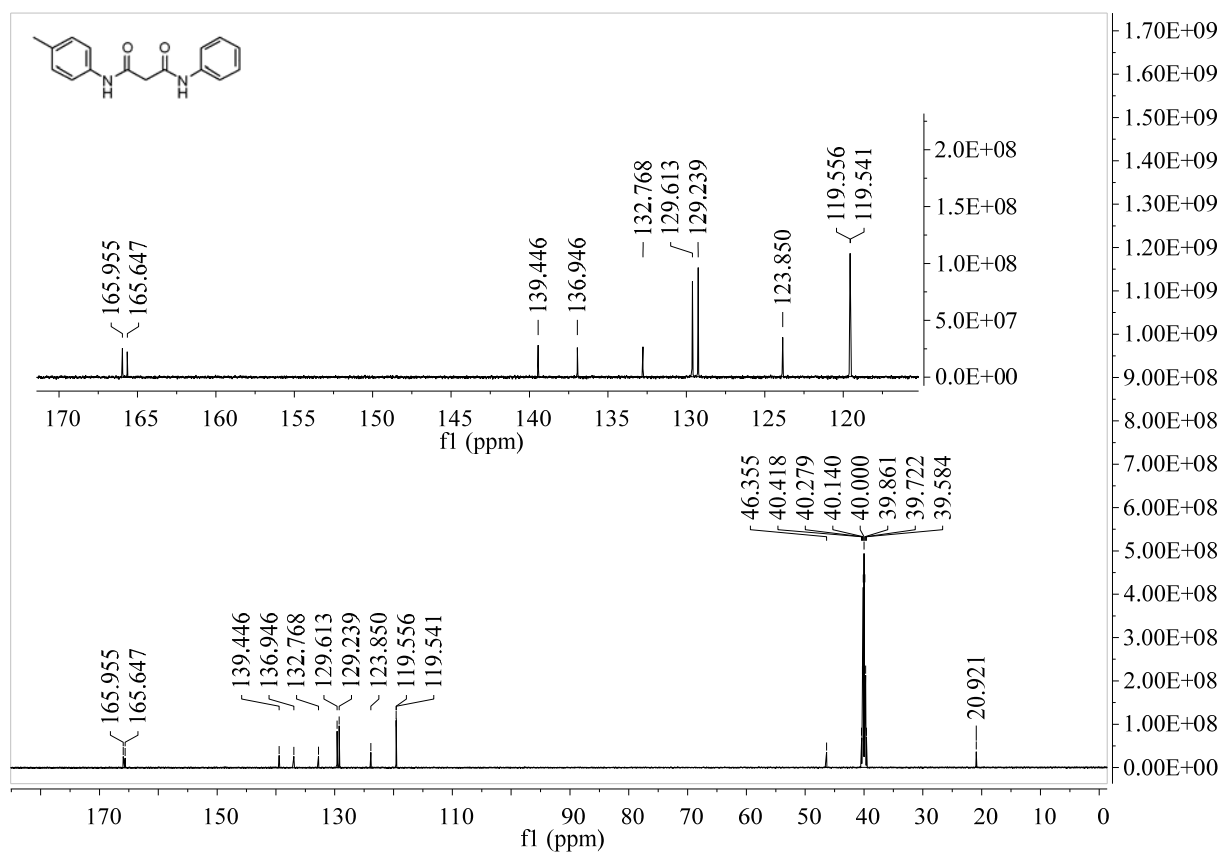

Compound 3i

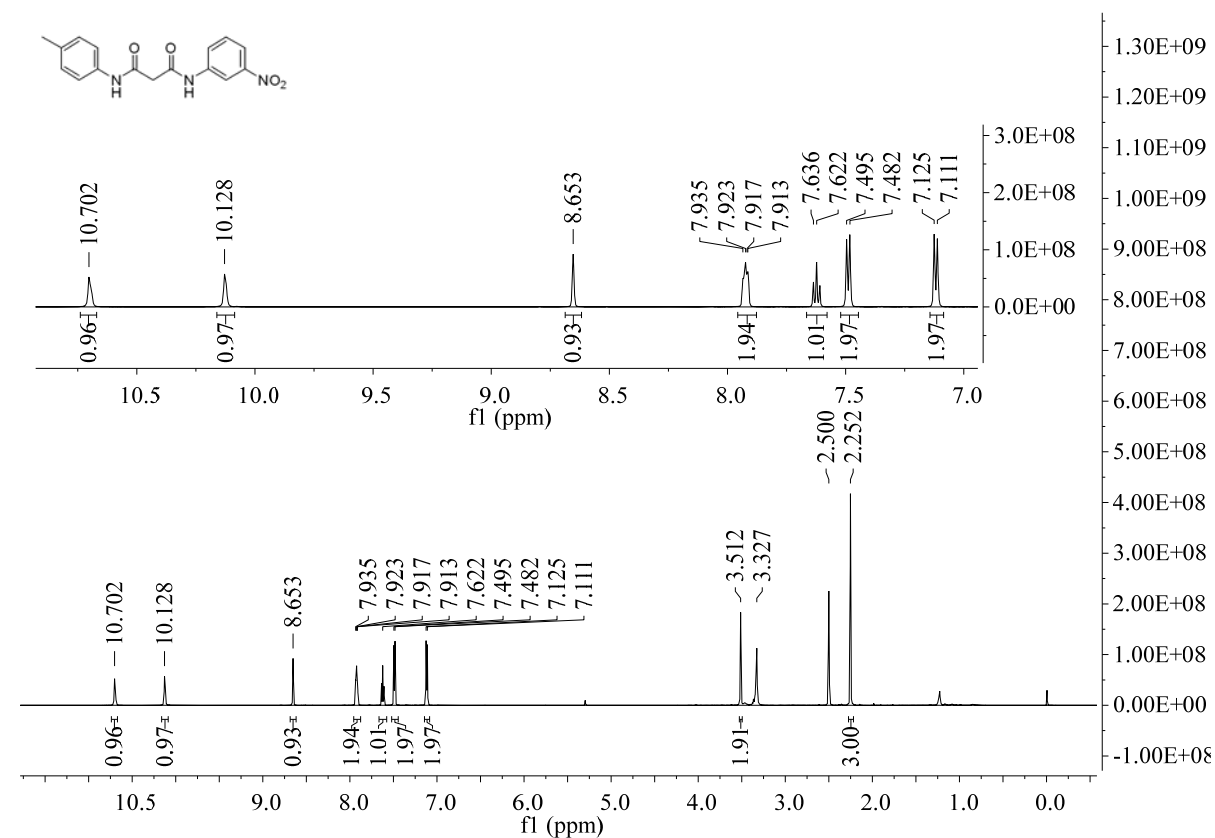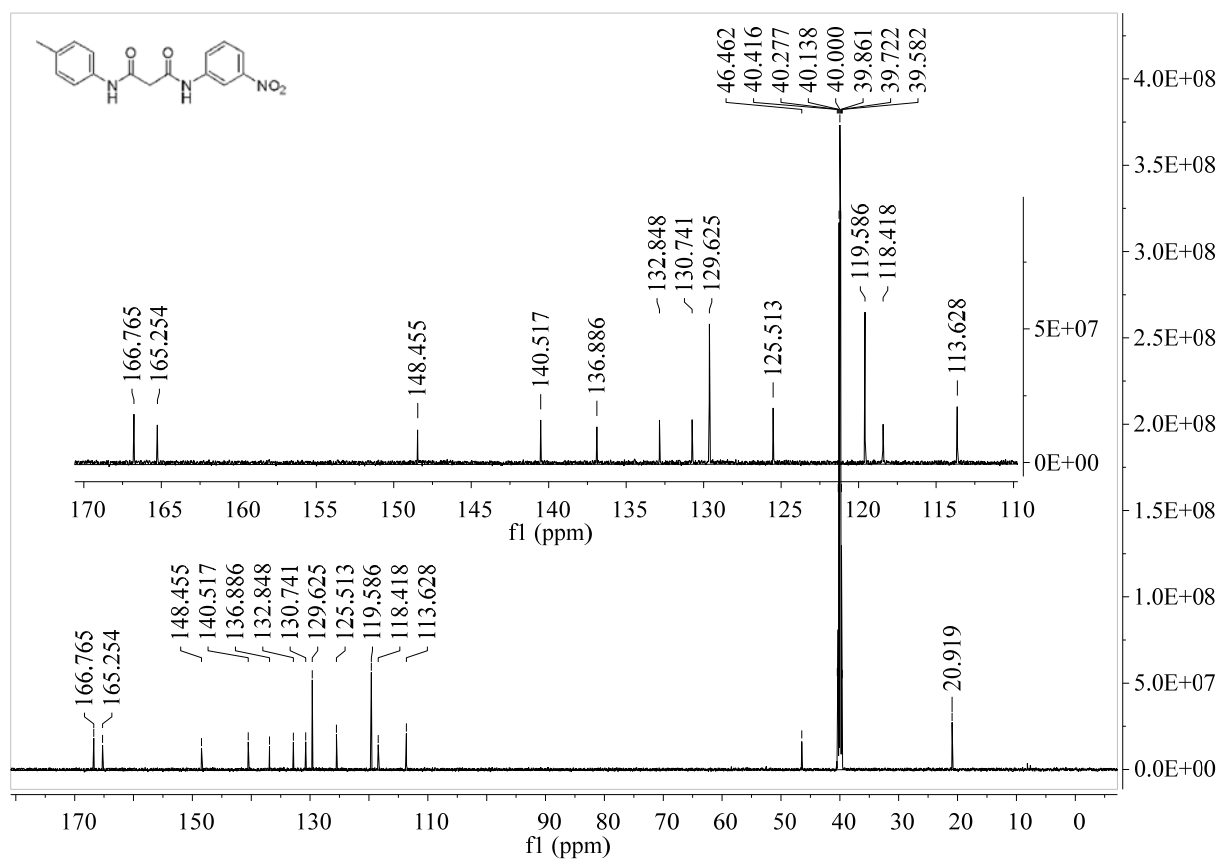

Compound 3j

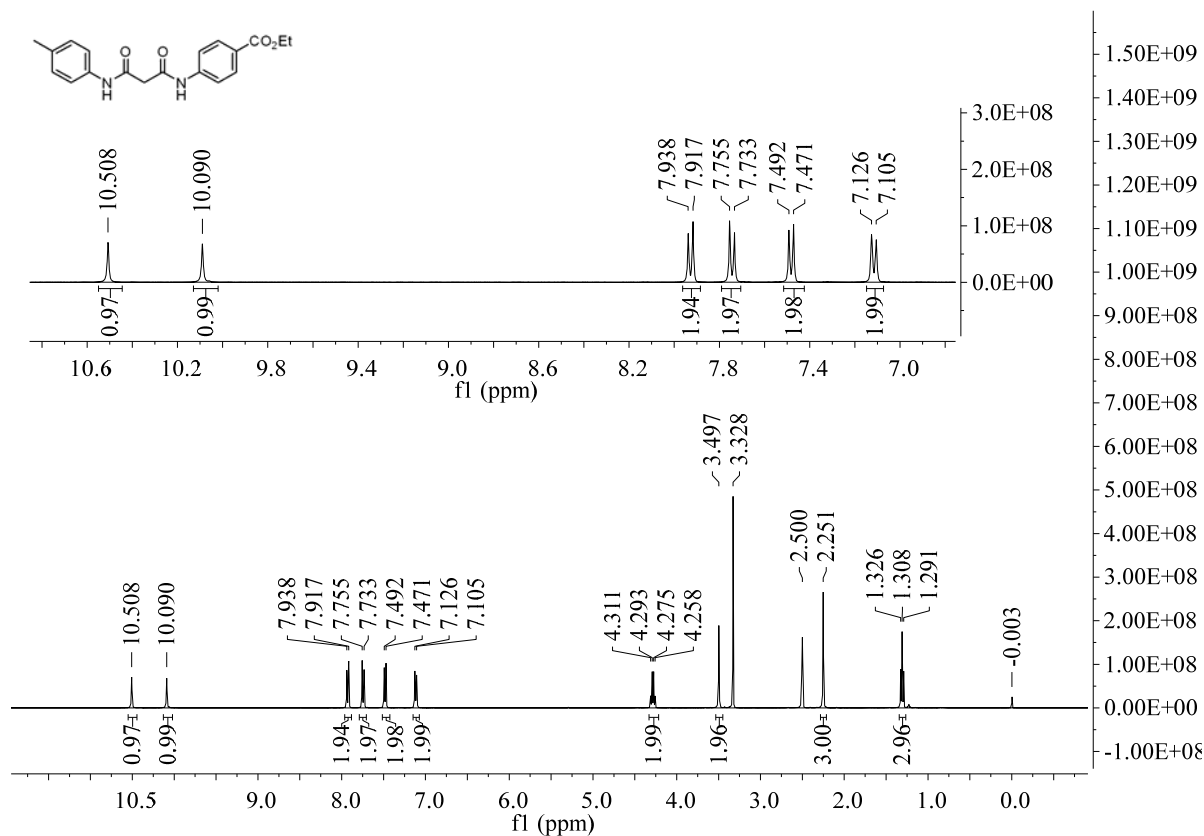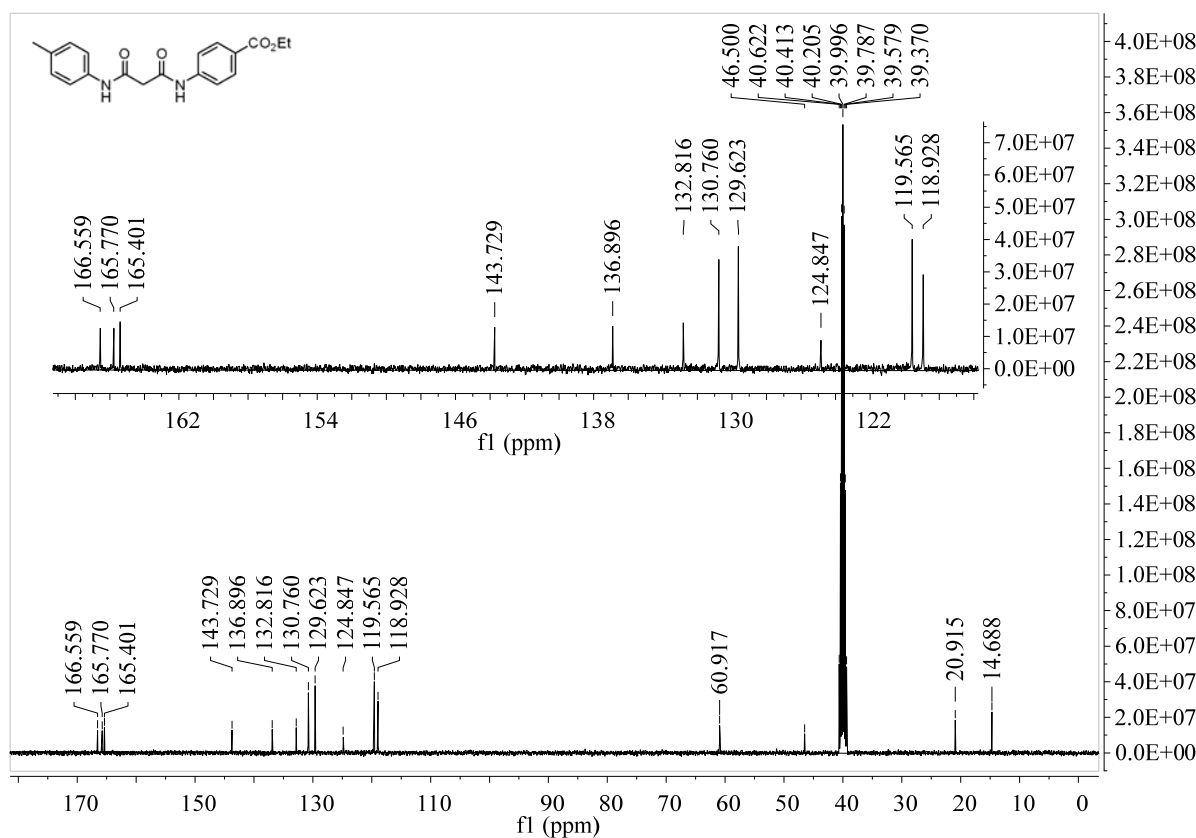



Compound 3k

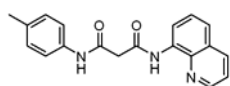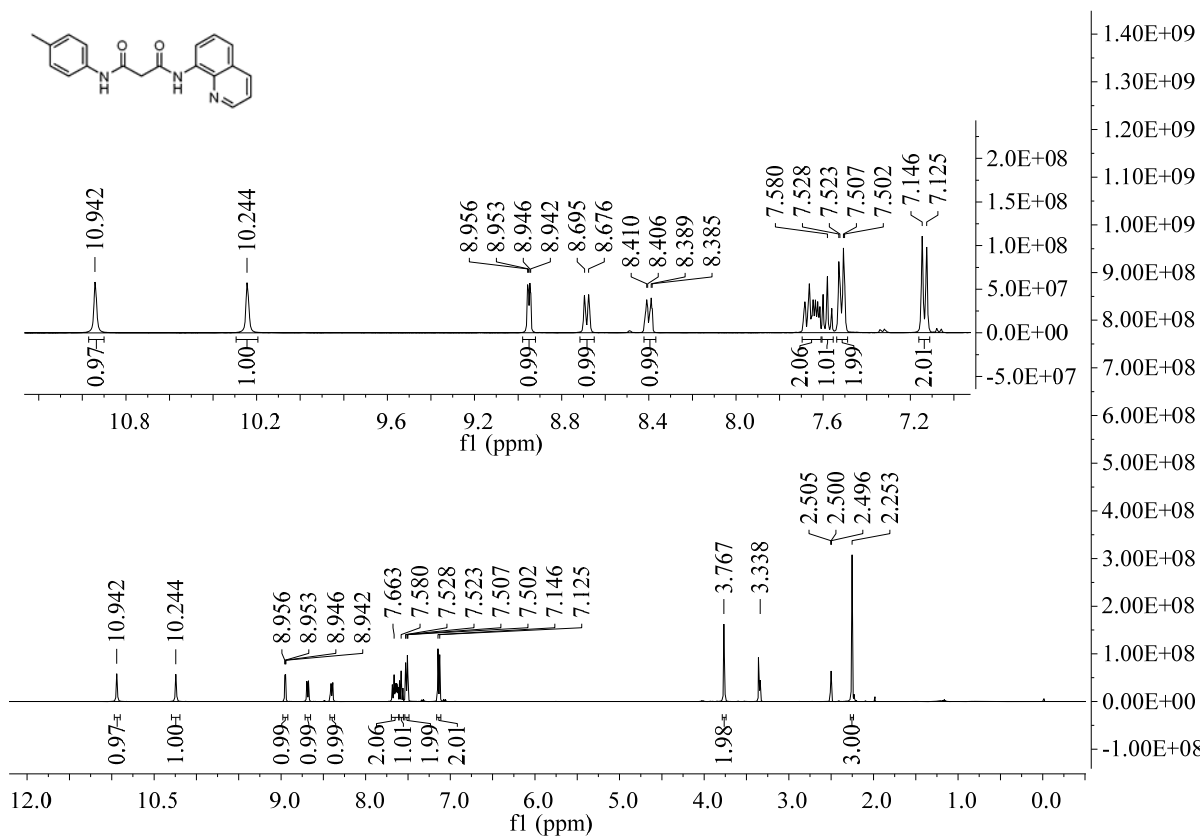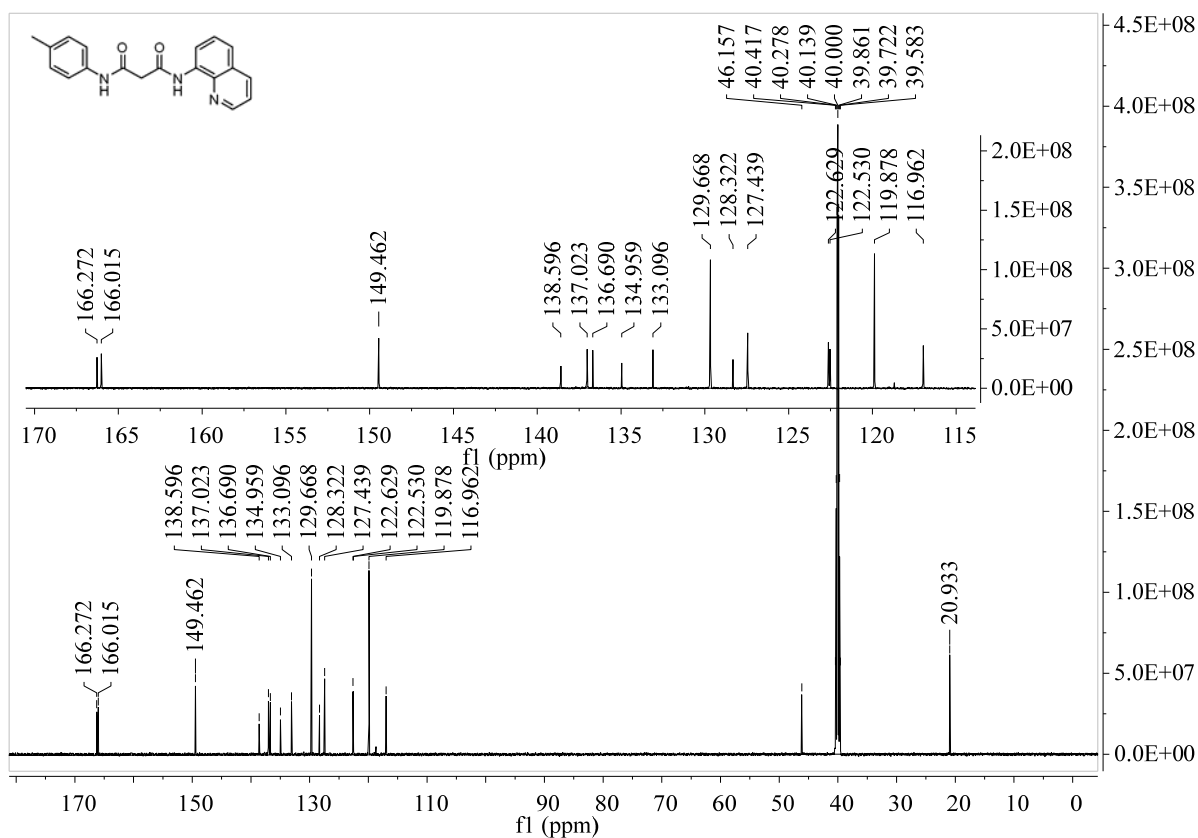

Compound 31

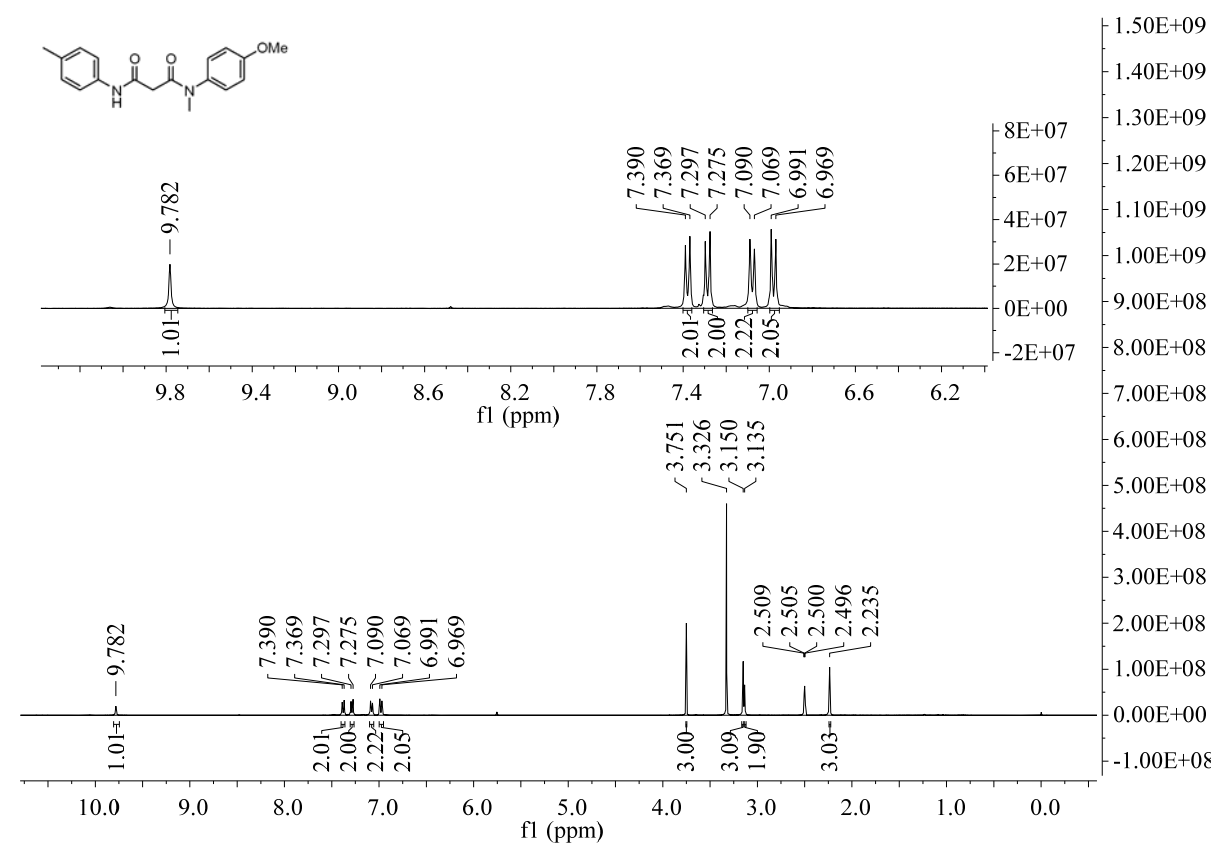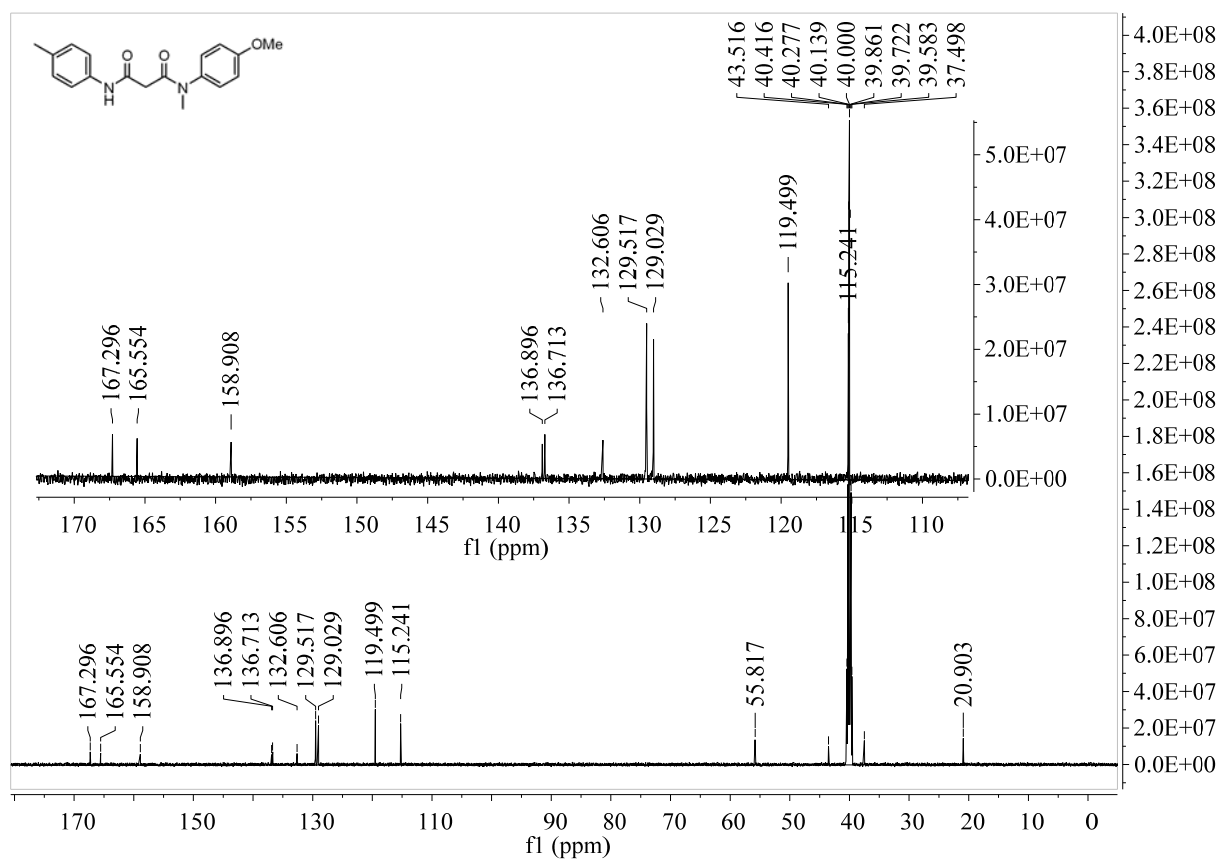

Compound 3m

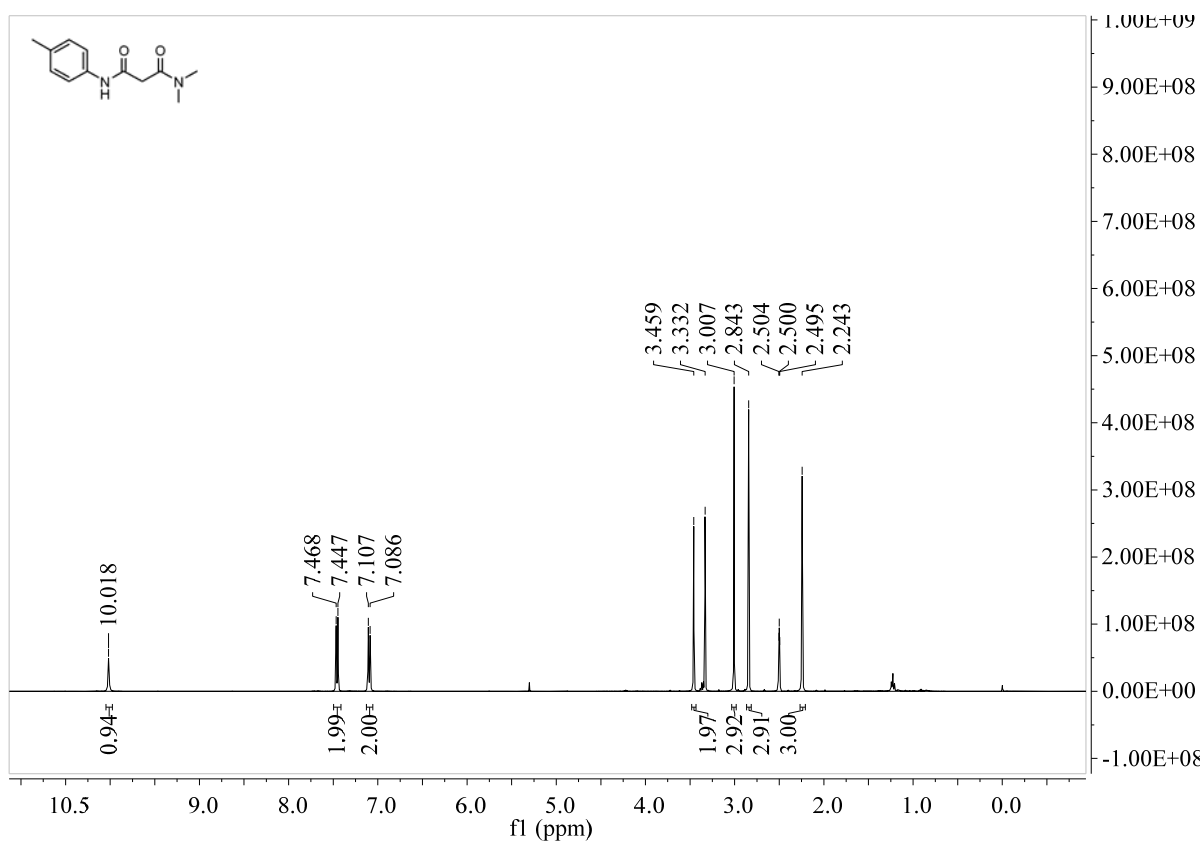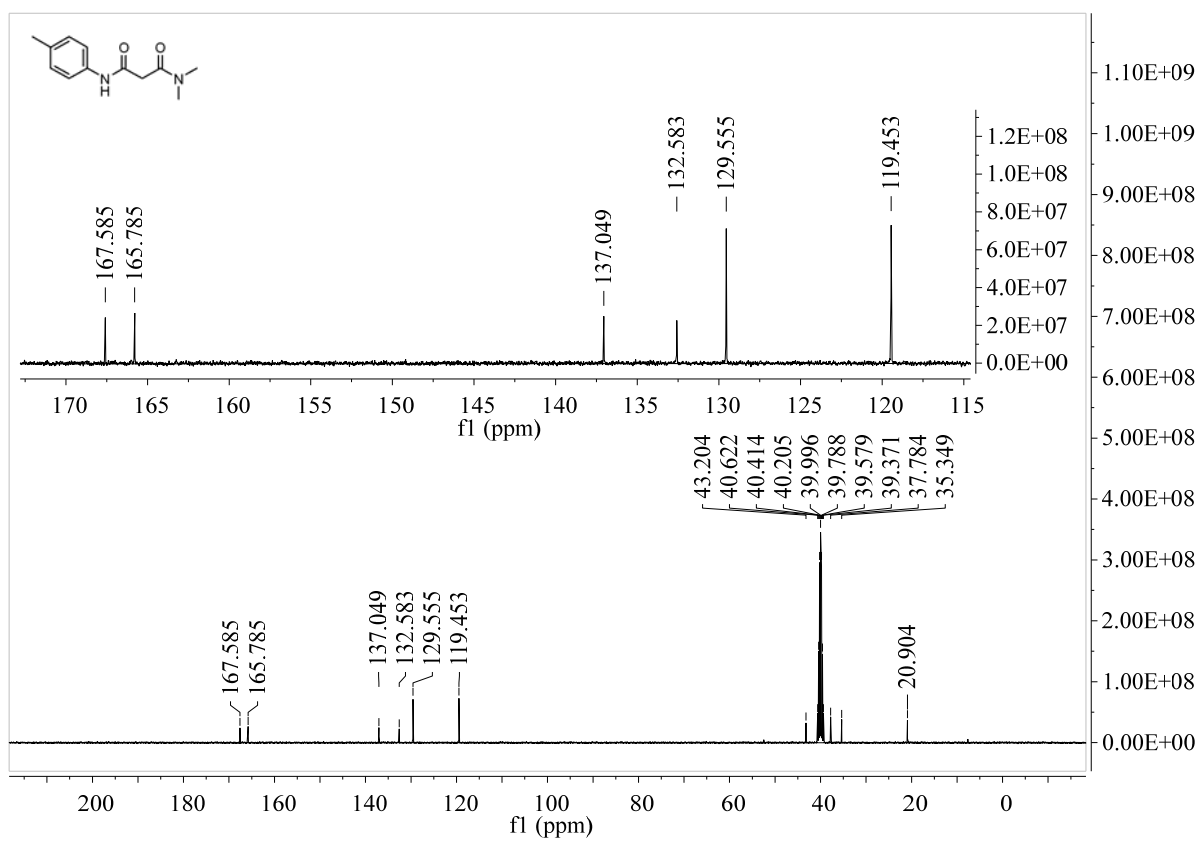

Compound 3n

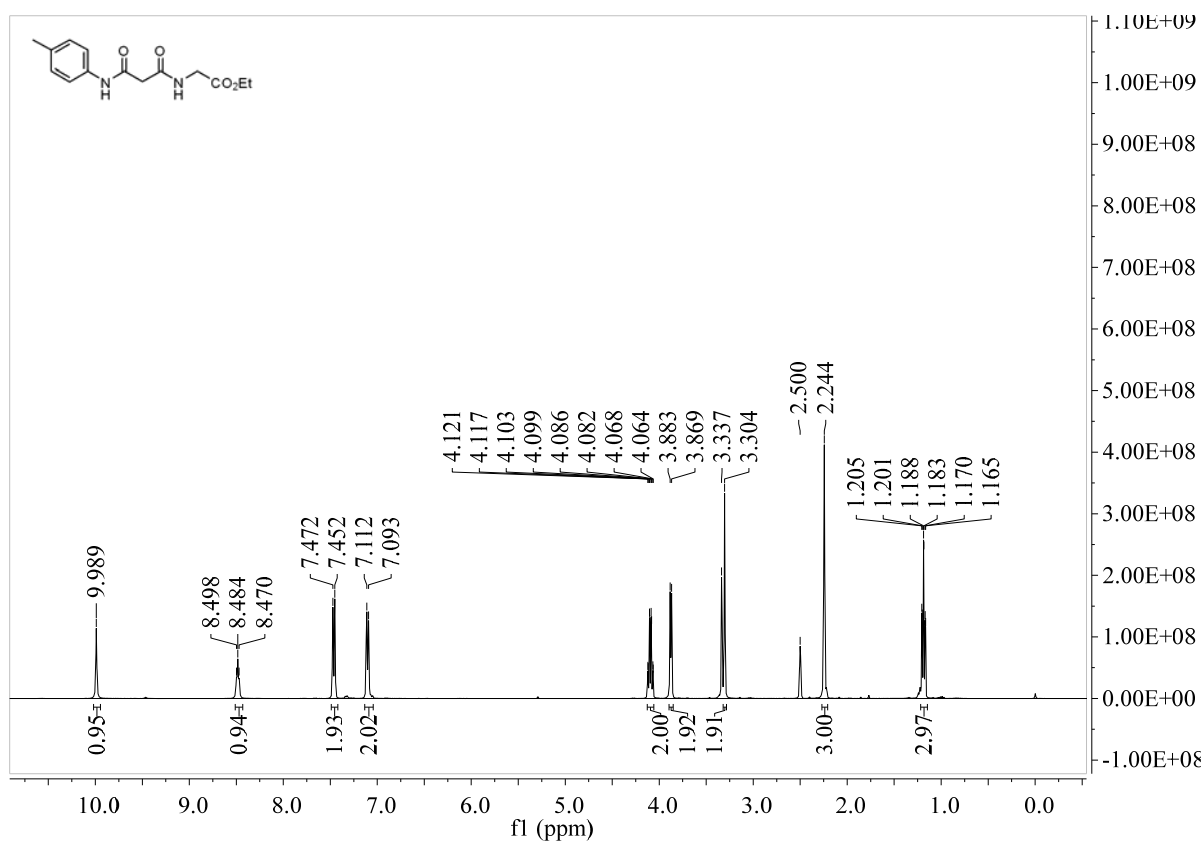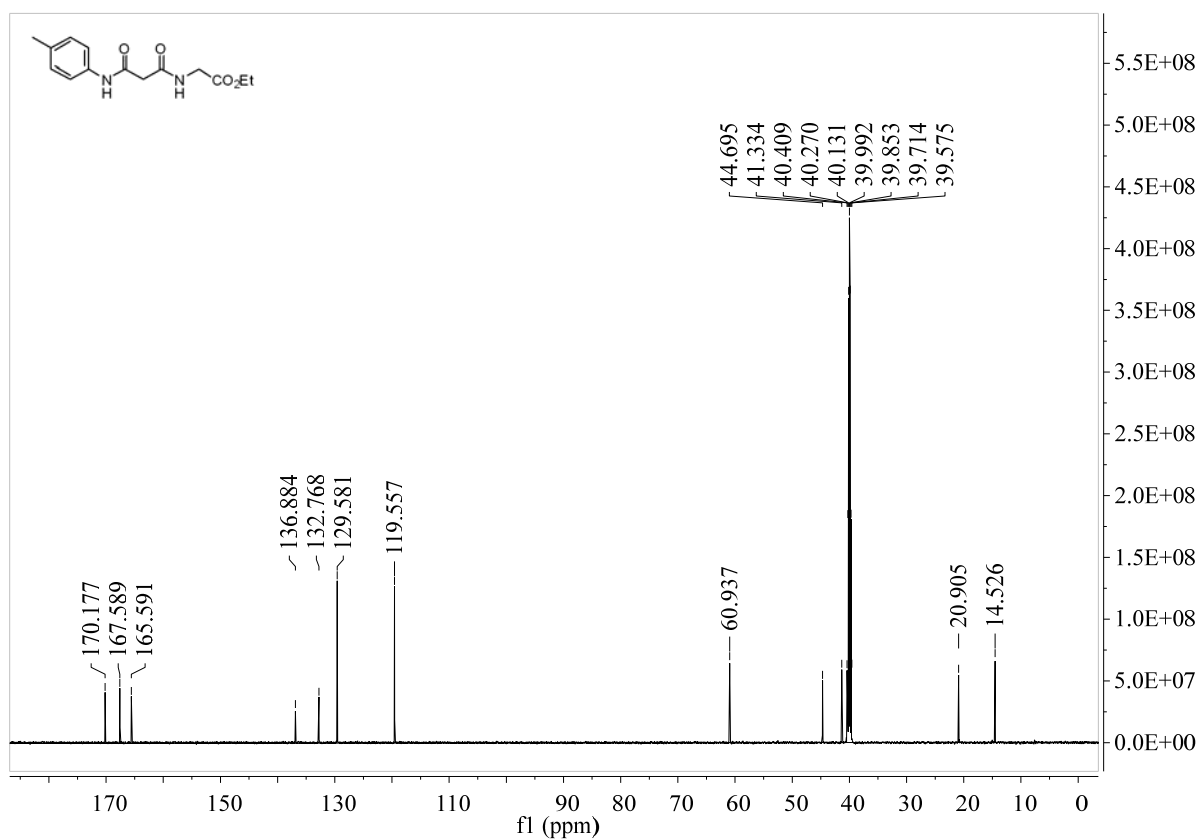

Compound 3o

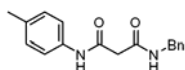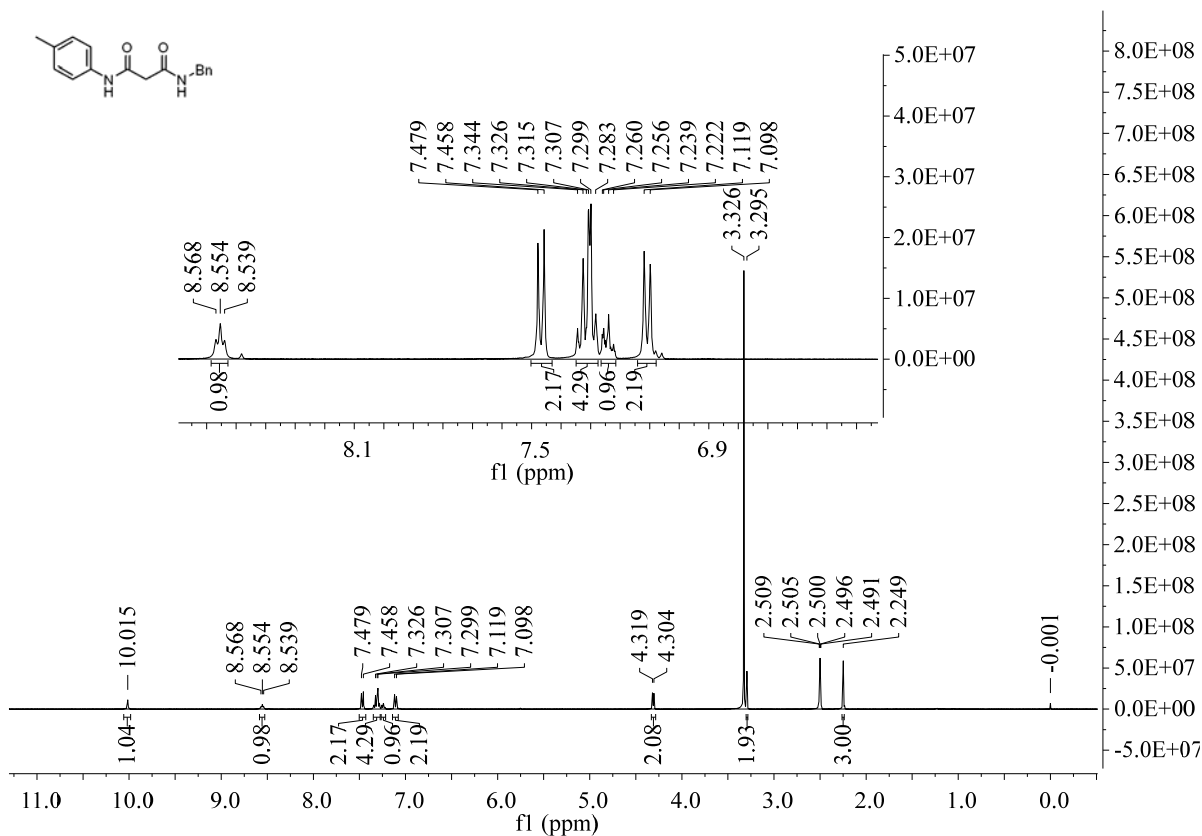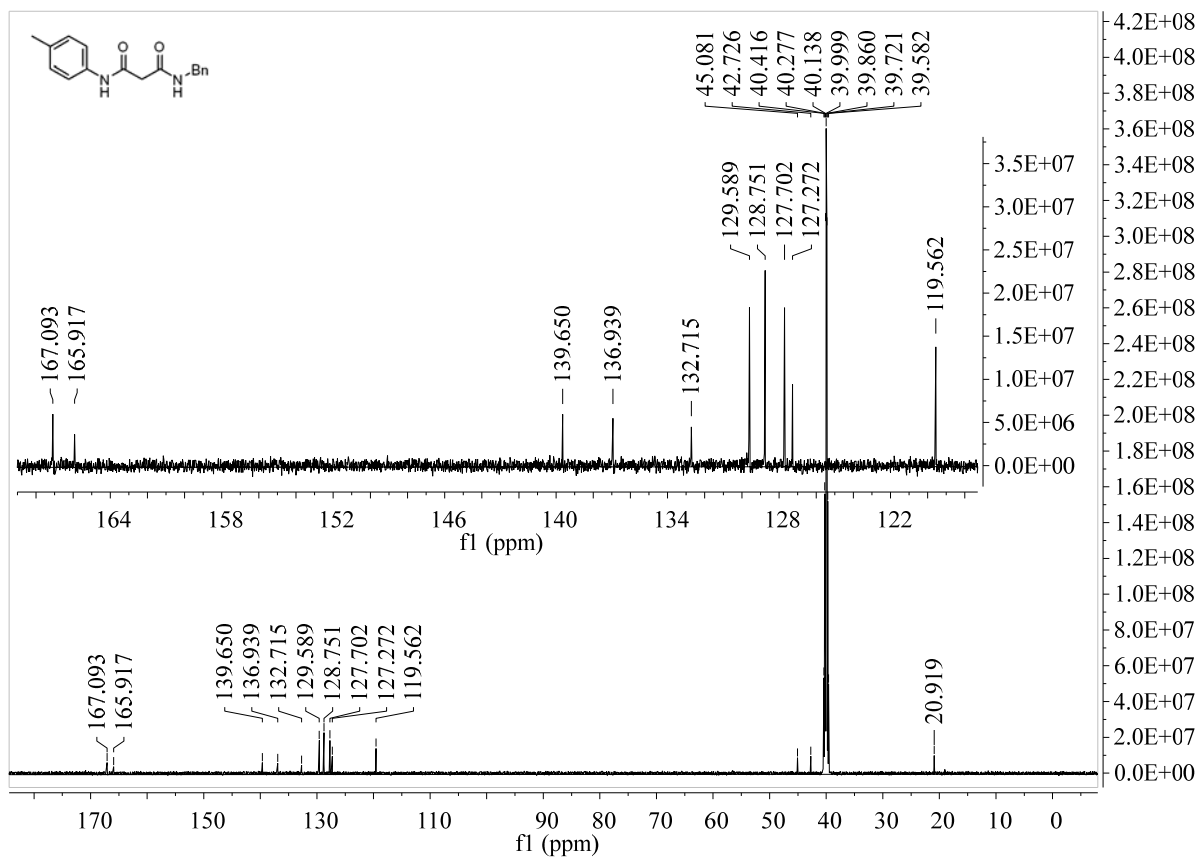

Compound 3p

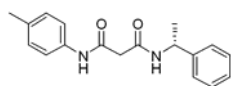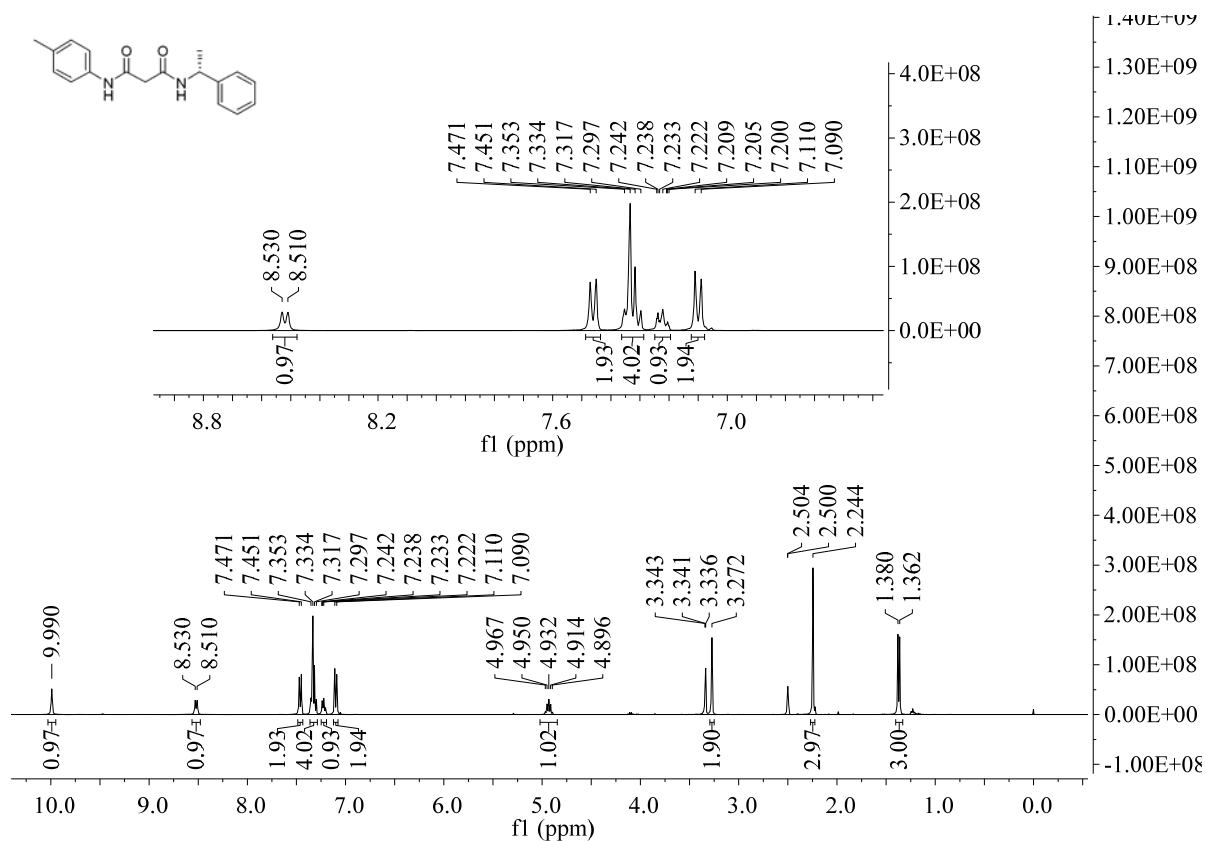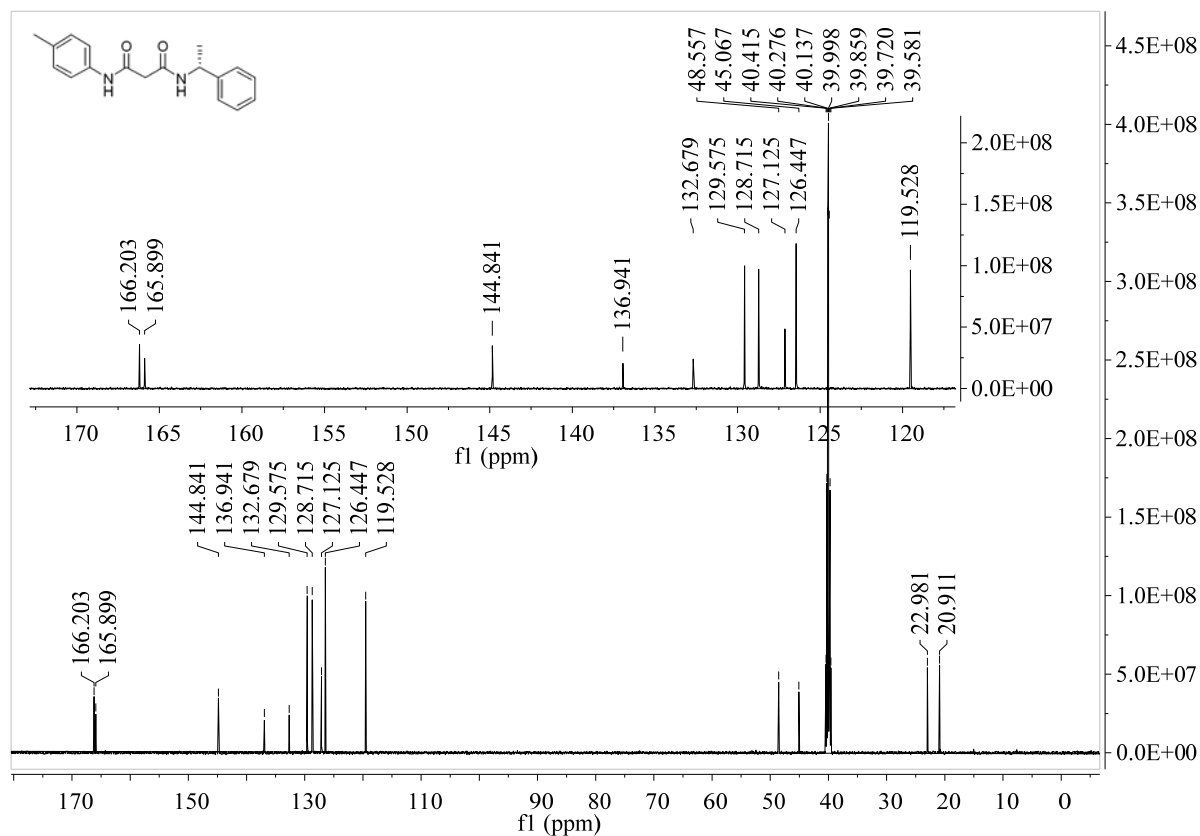

Compound 3q

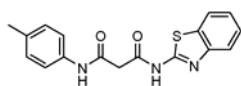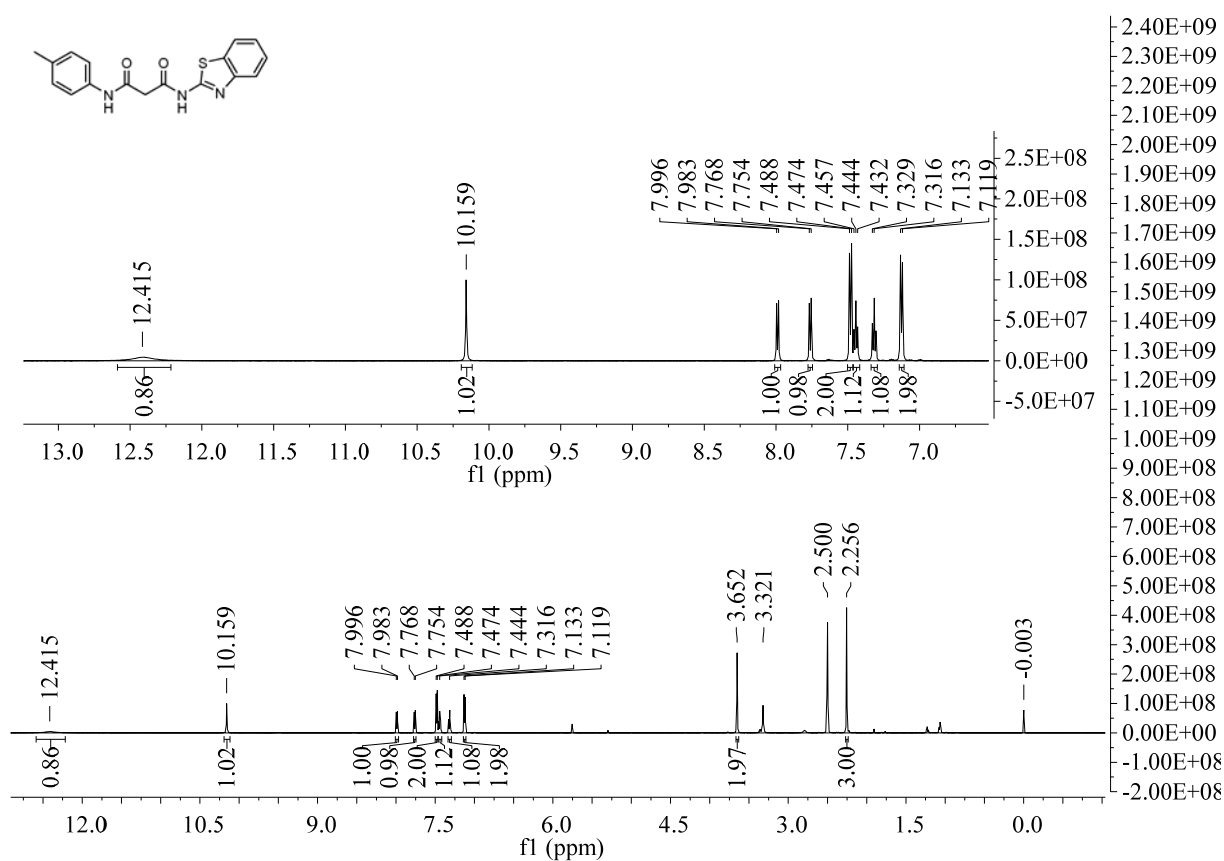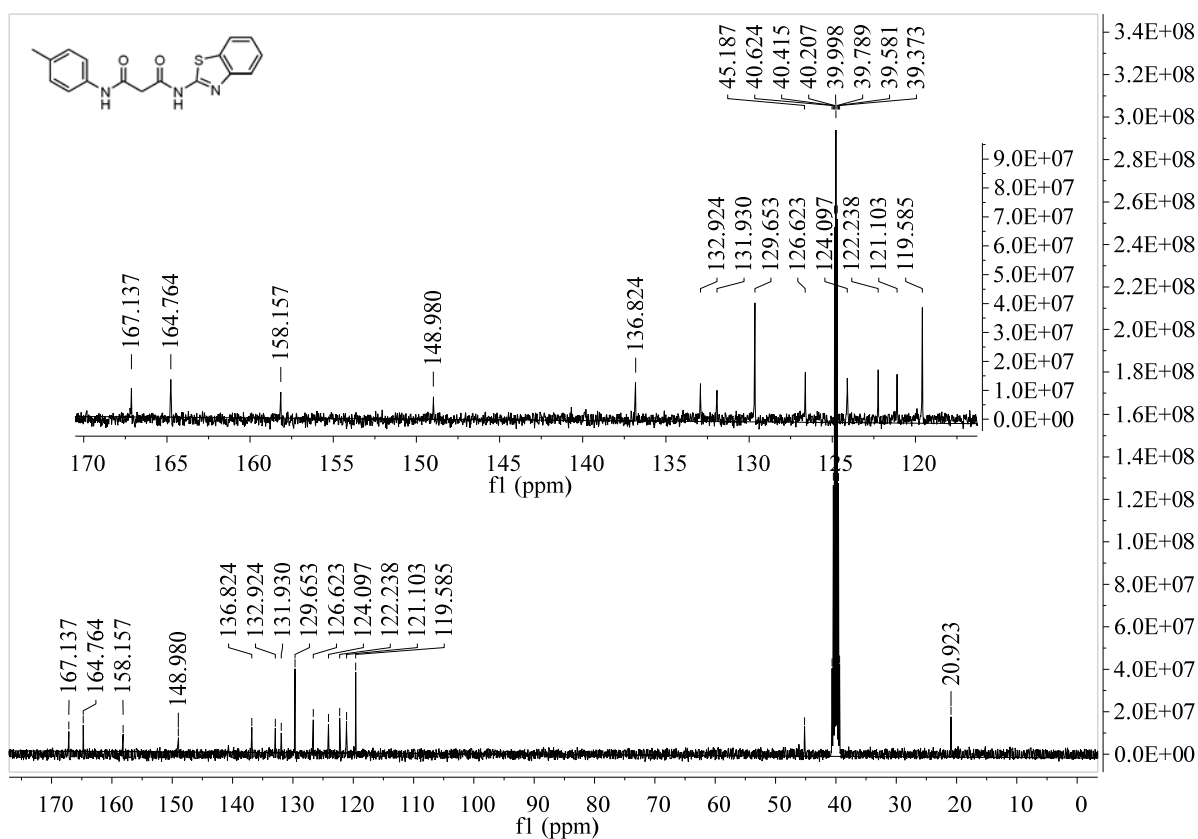

# Compound 3r

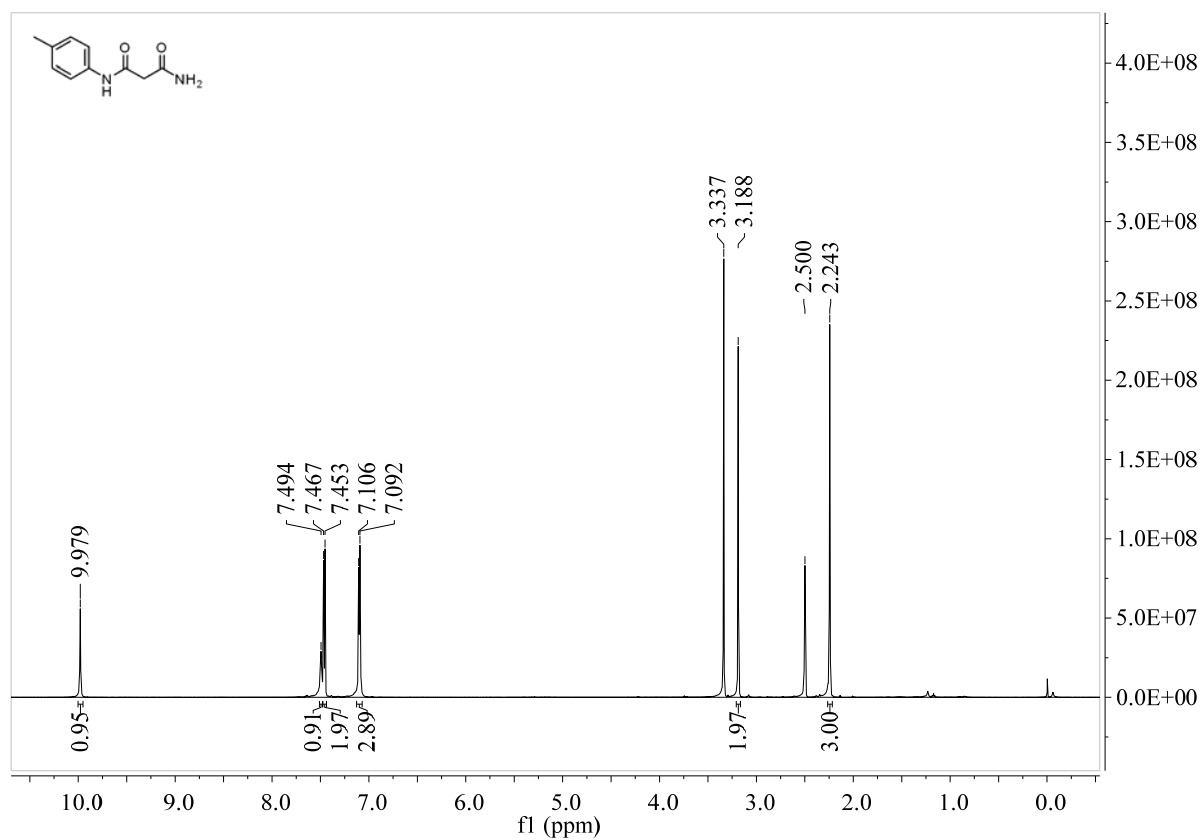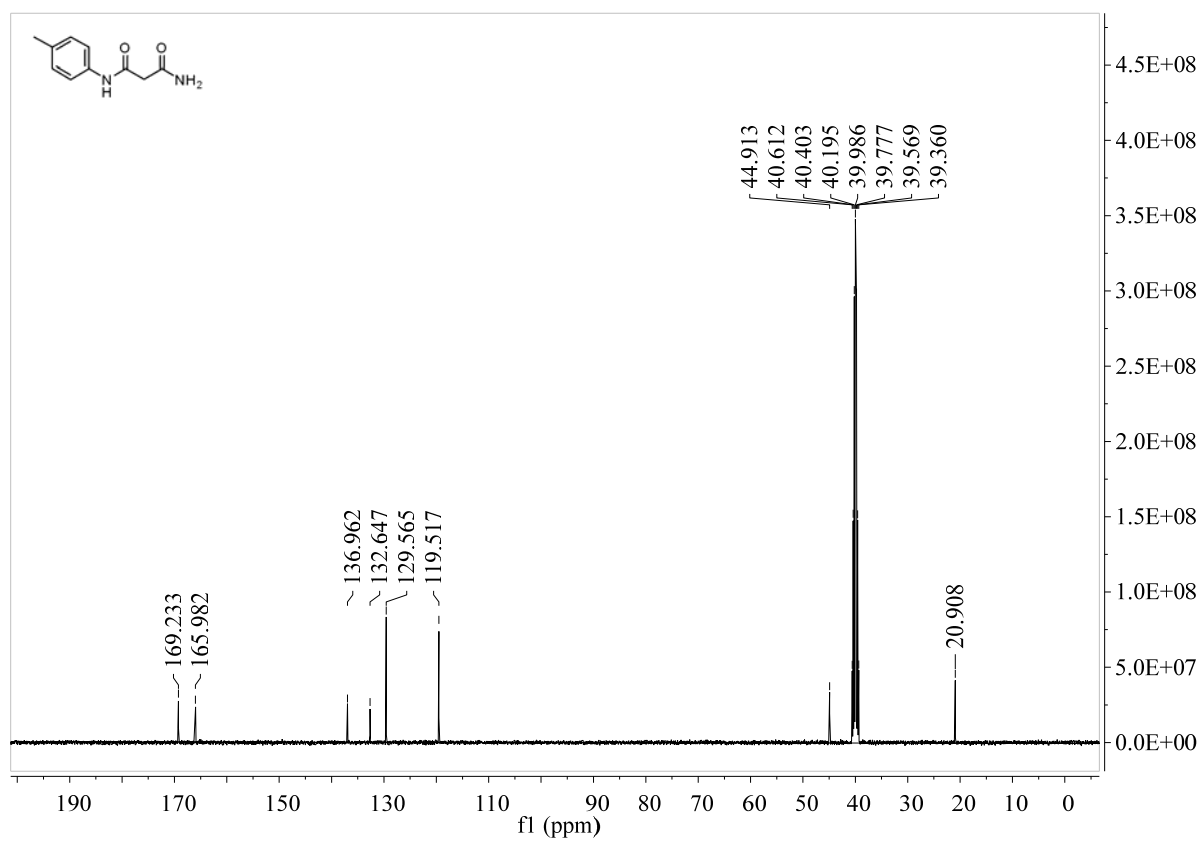



Compound 3s

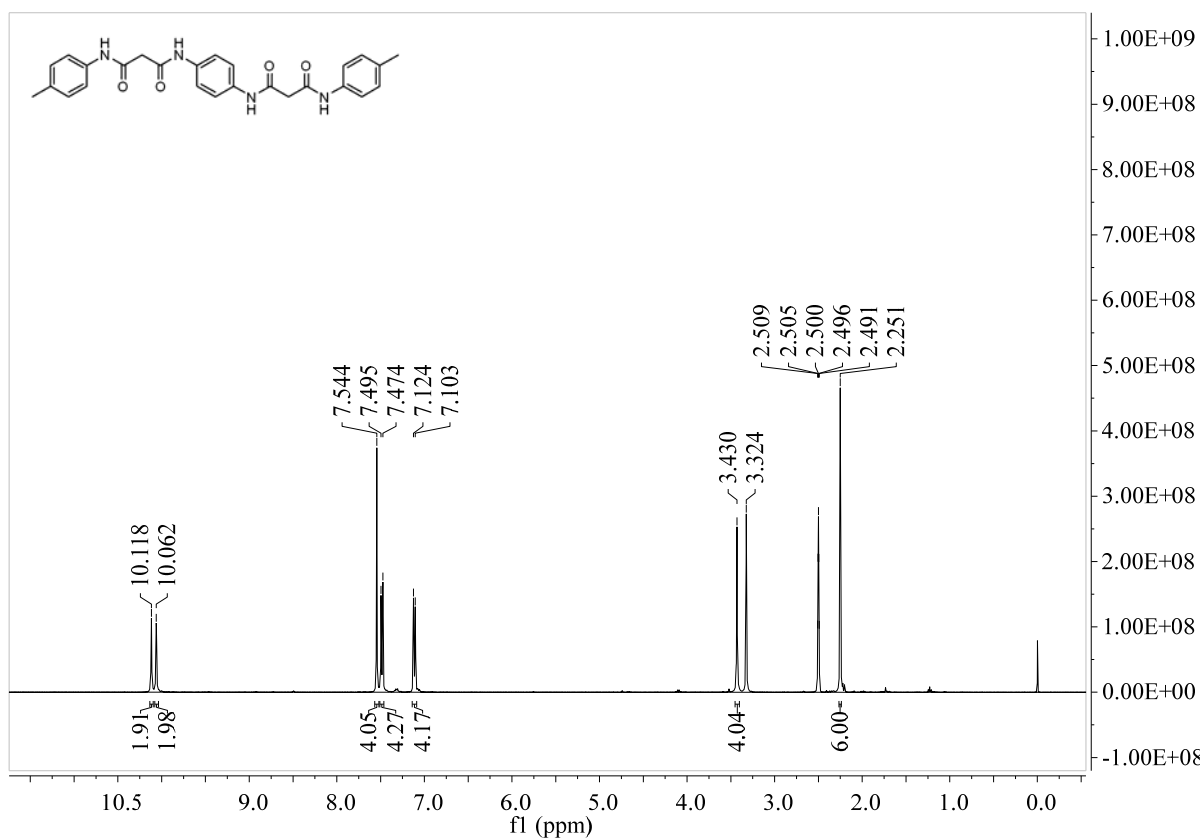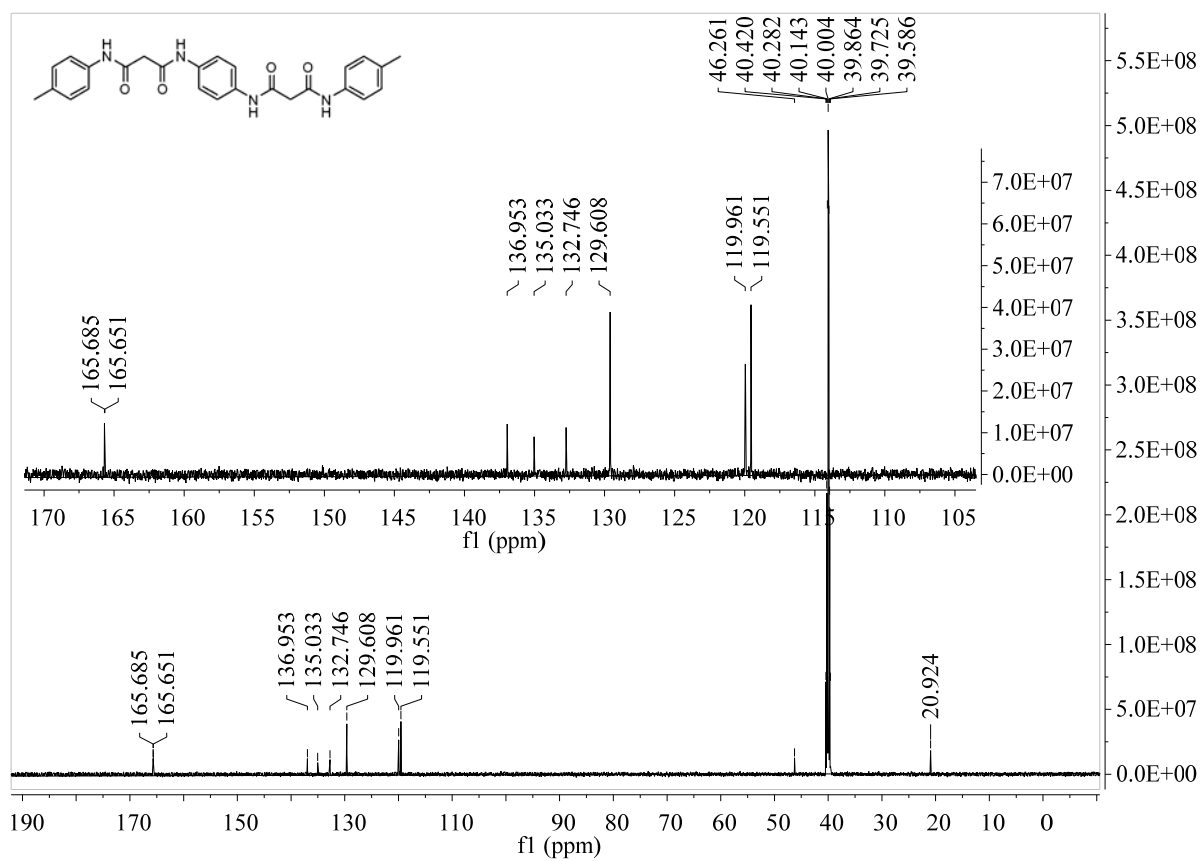

# Compound 3t

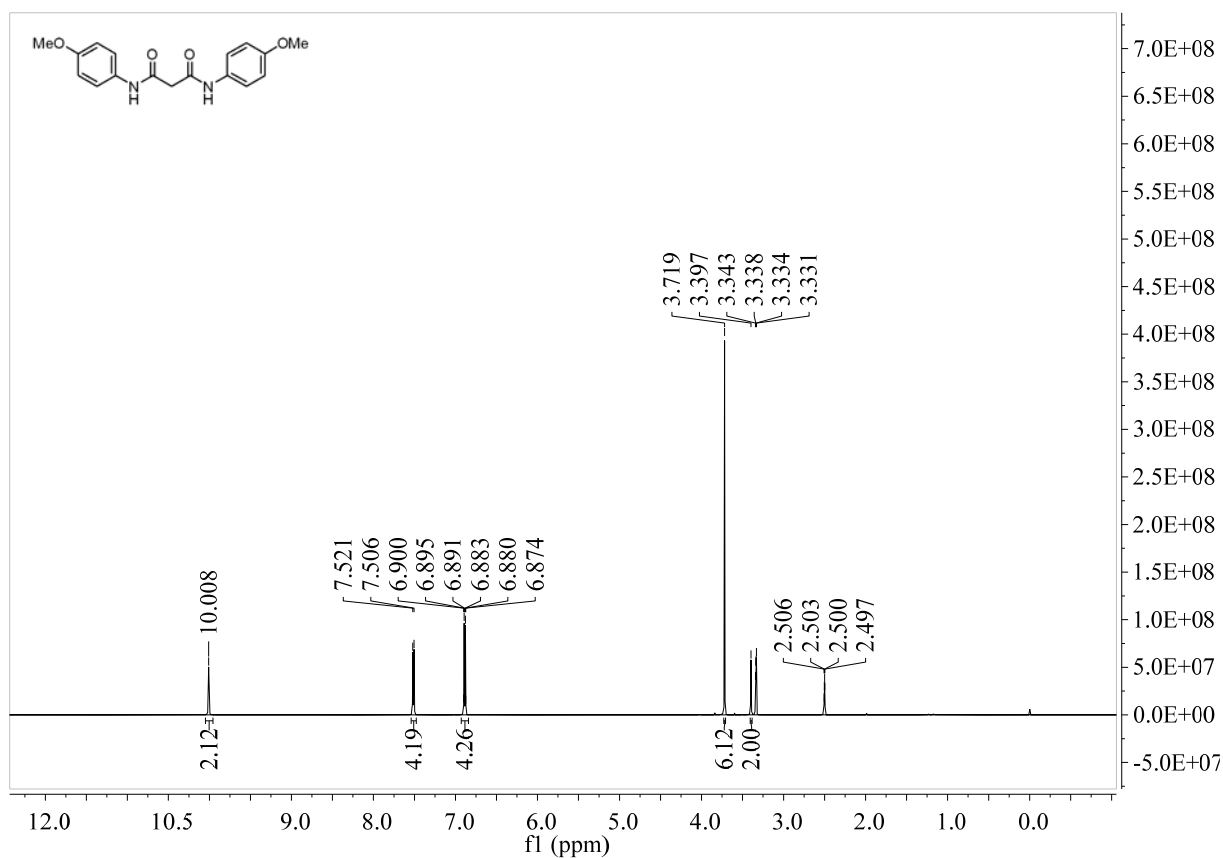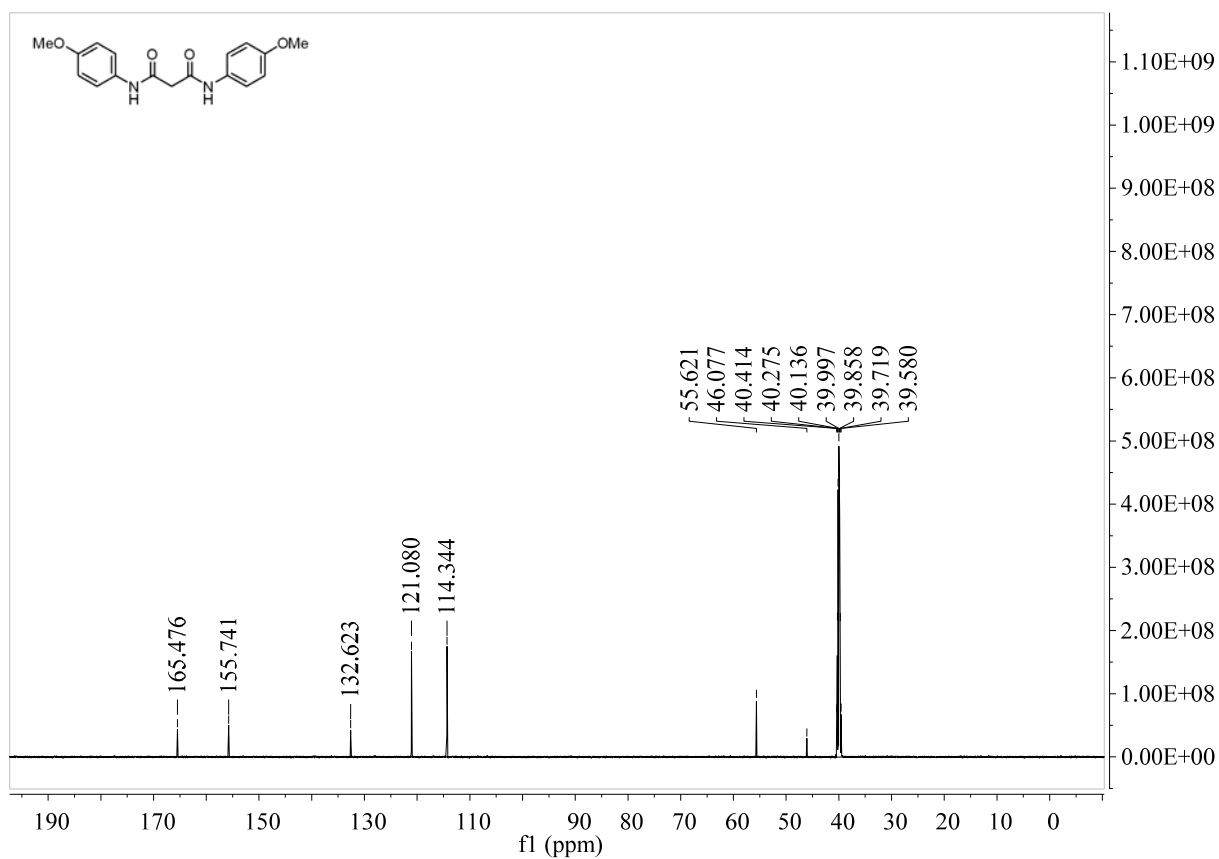

# Compound 3u

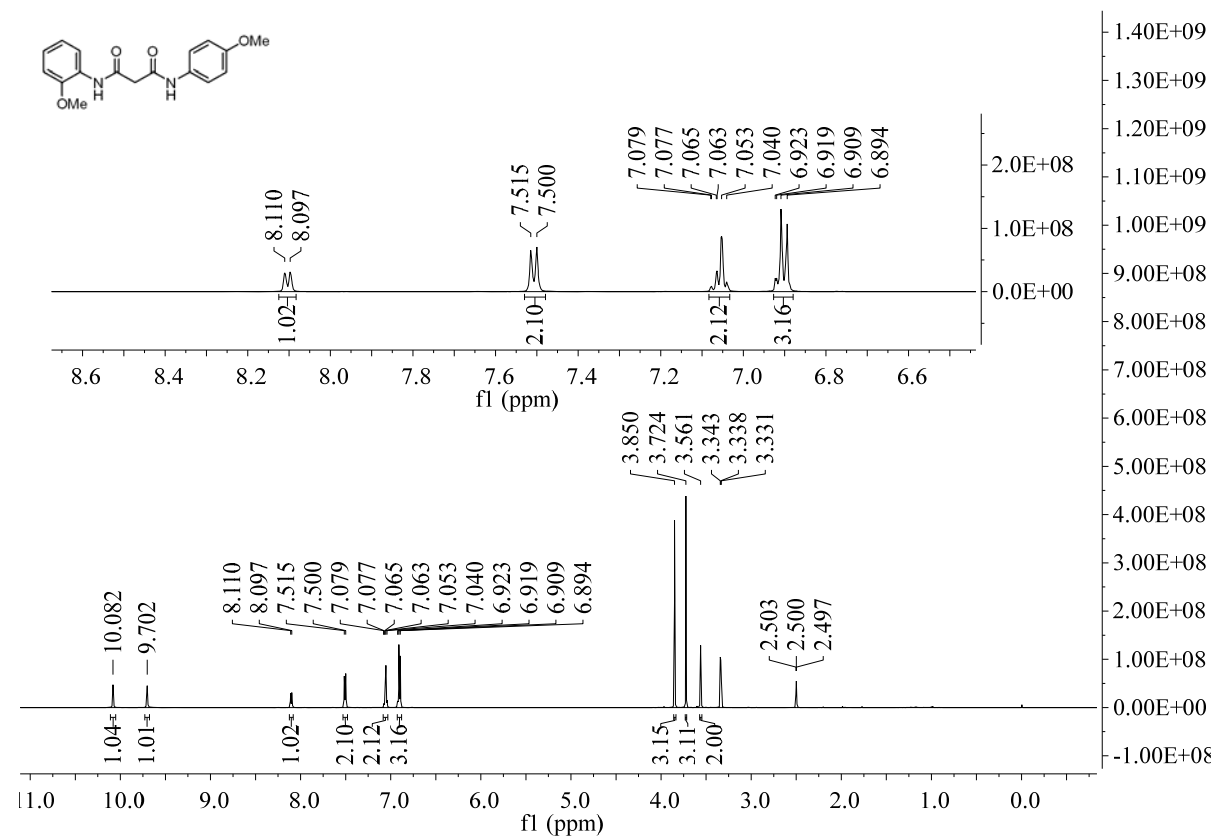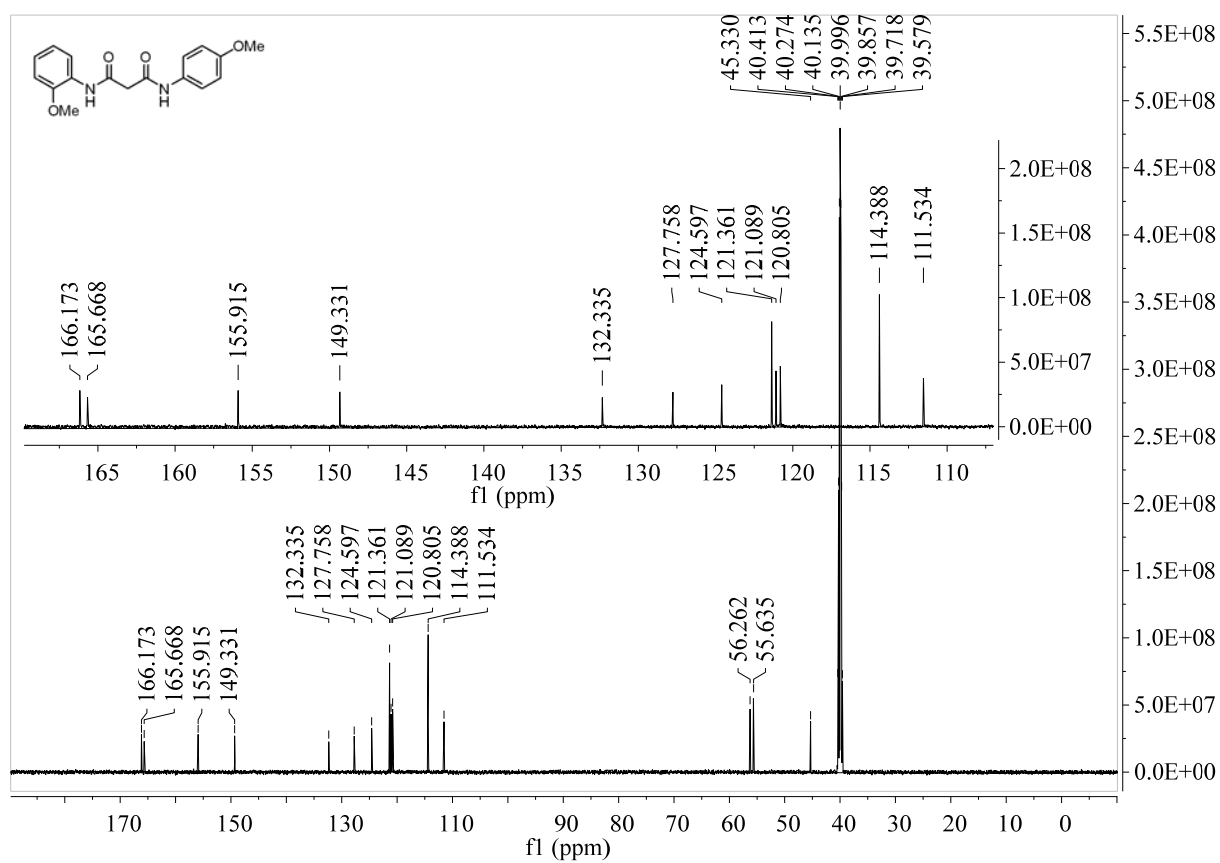

Compound 3v

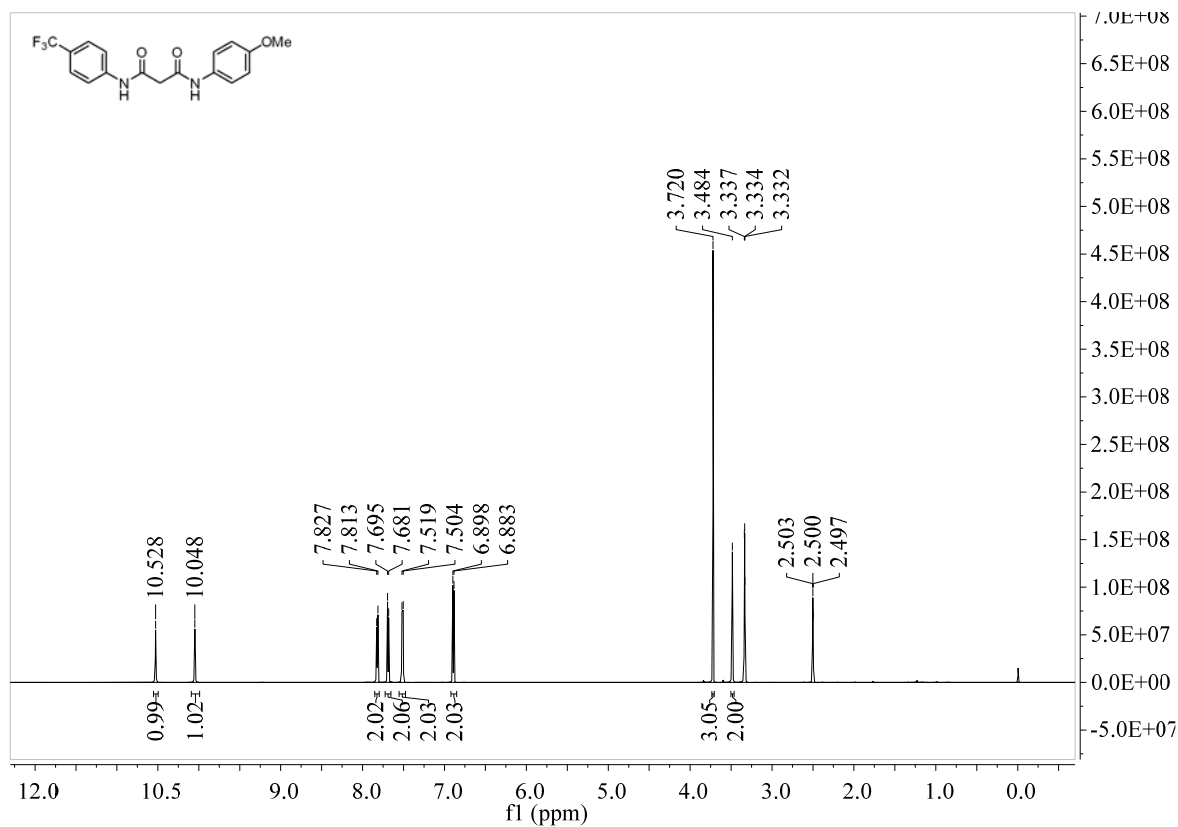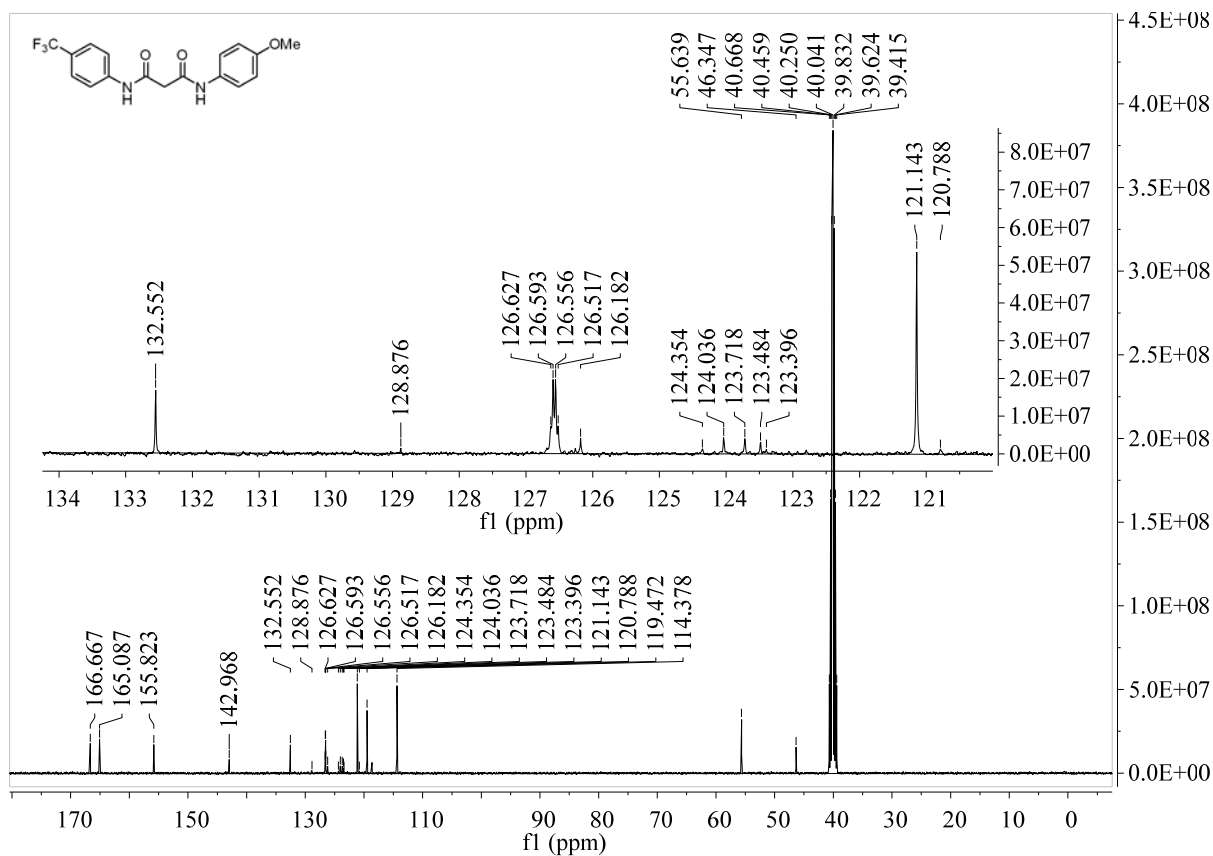

Compound 3w

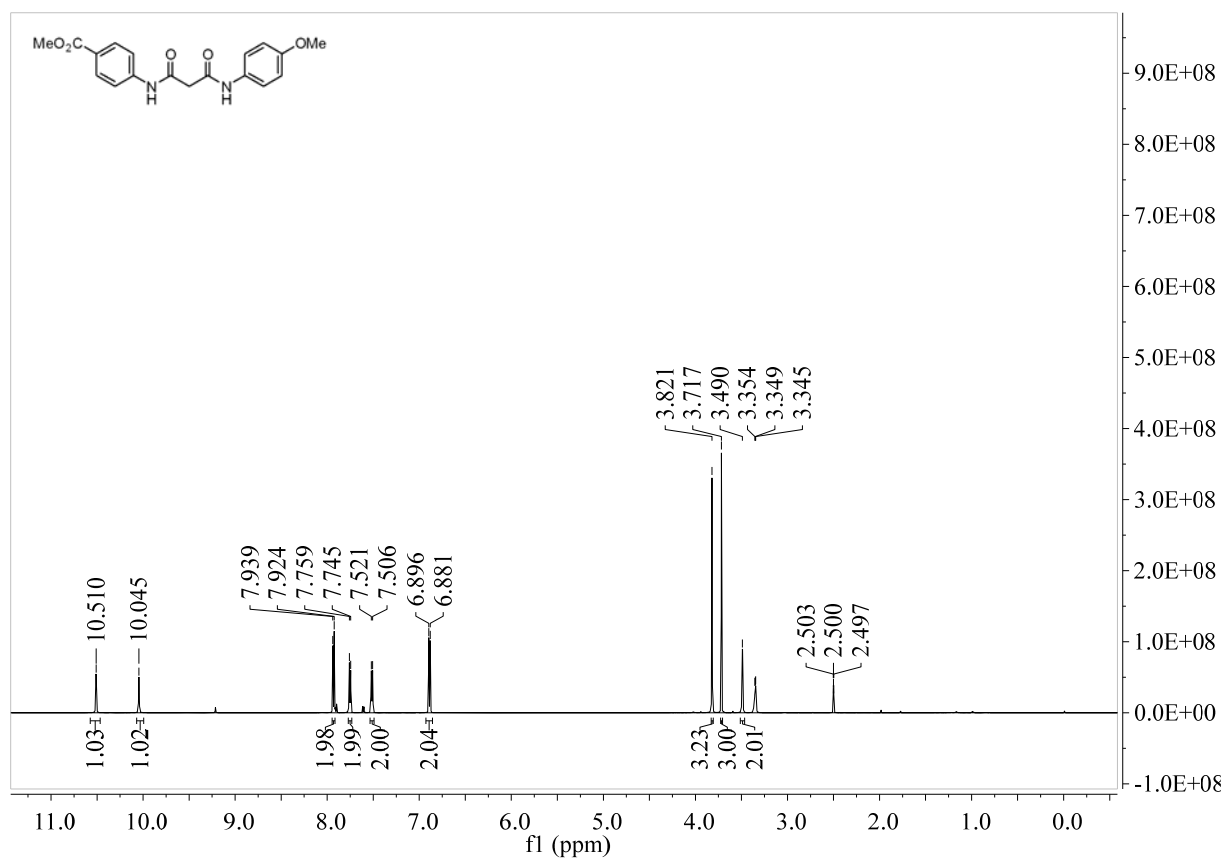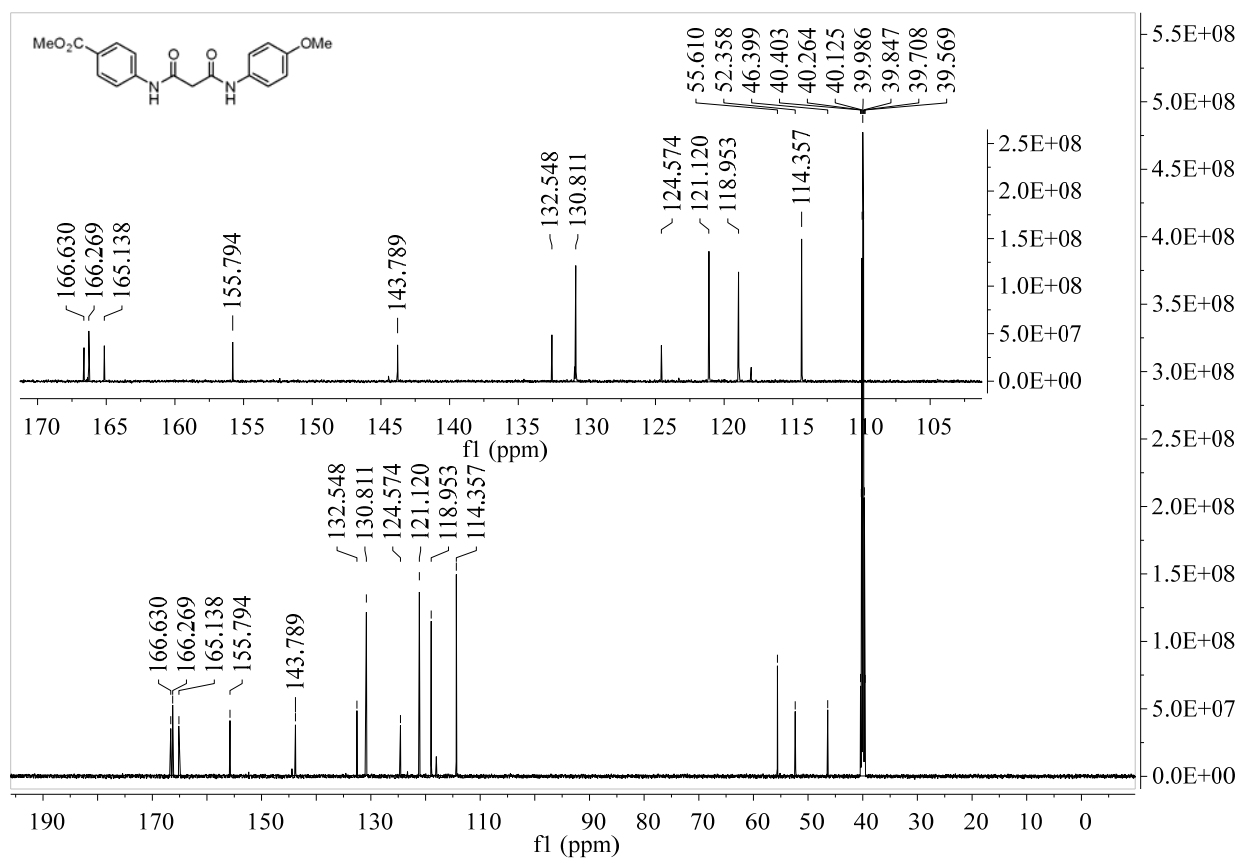

Compound 3x

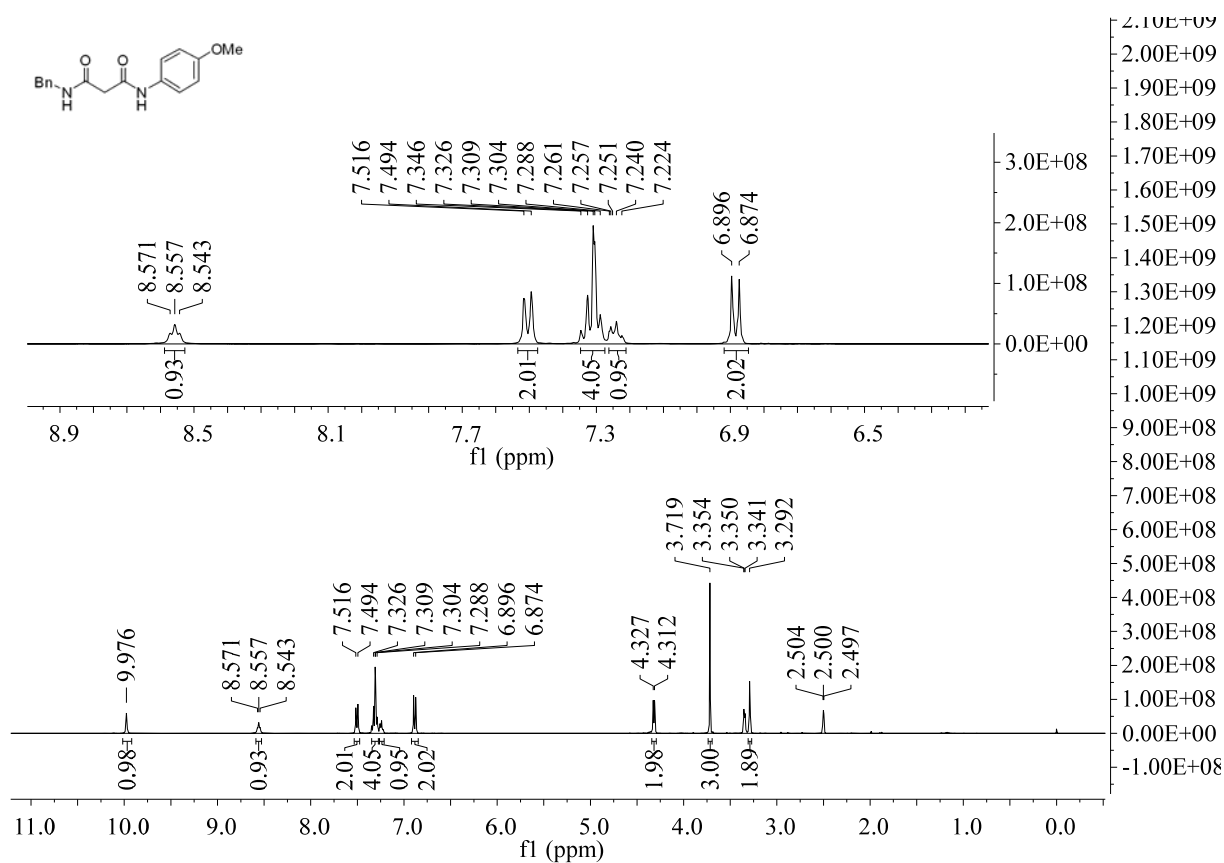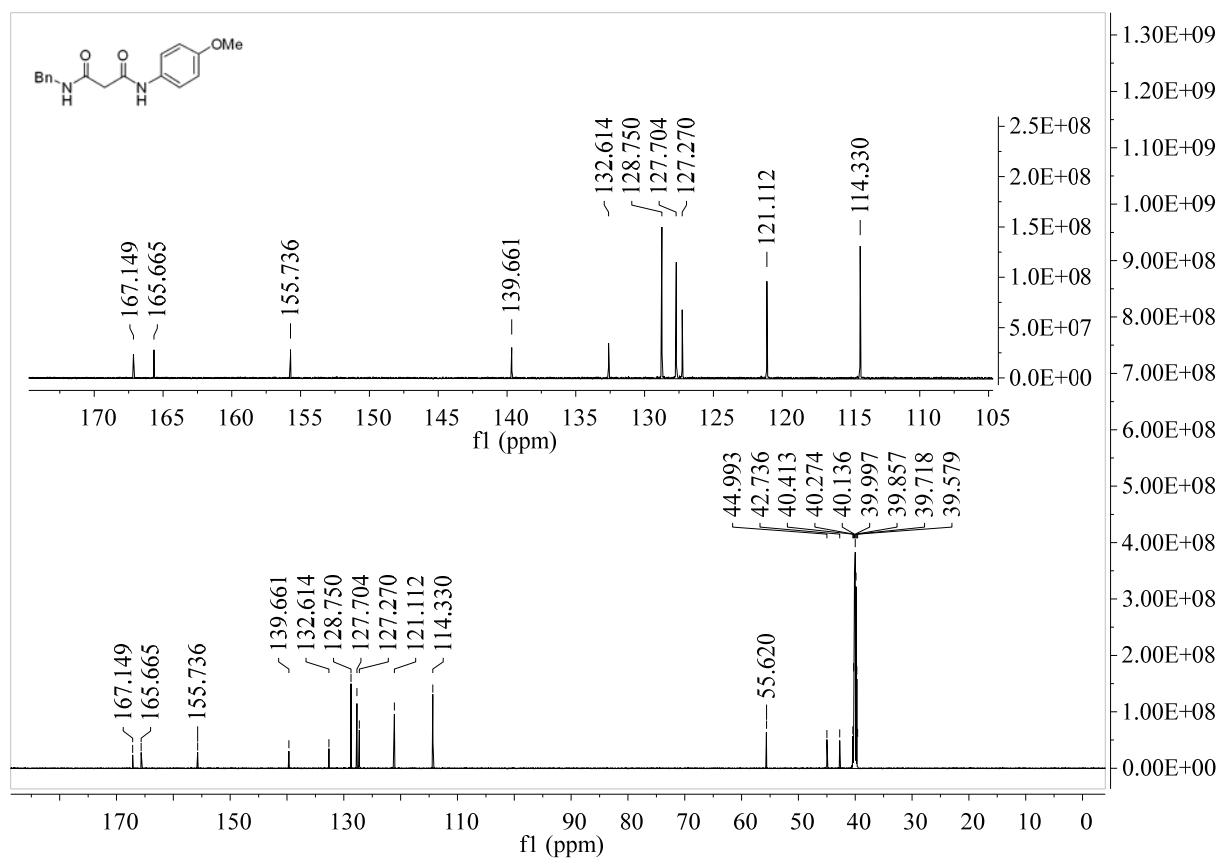

# Compound 3y

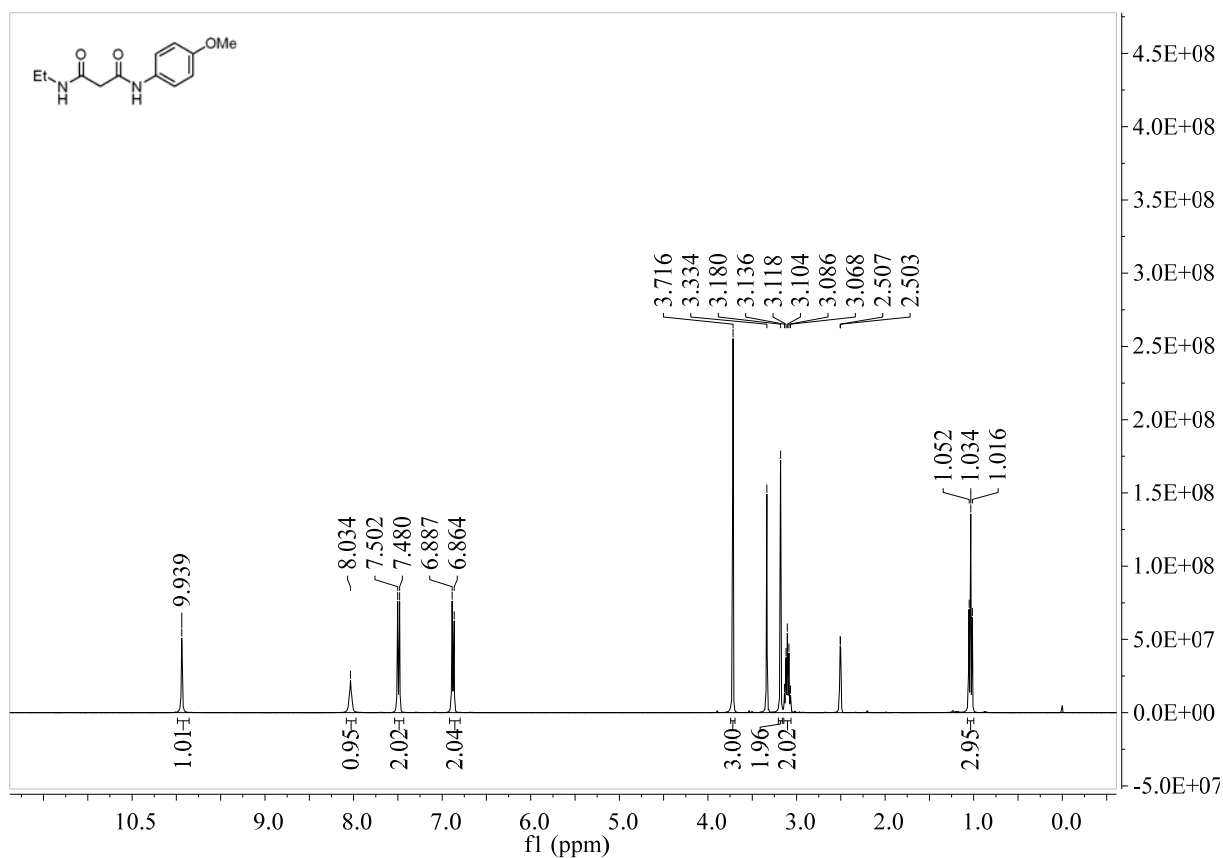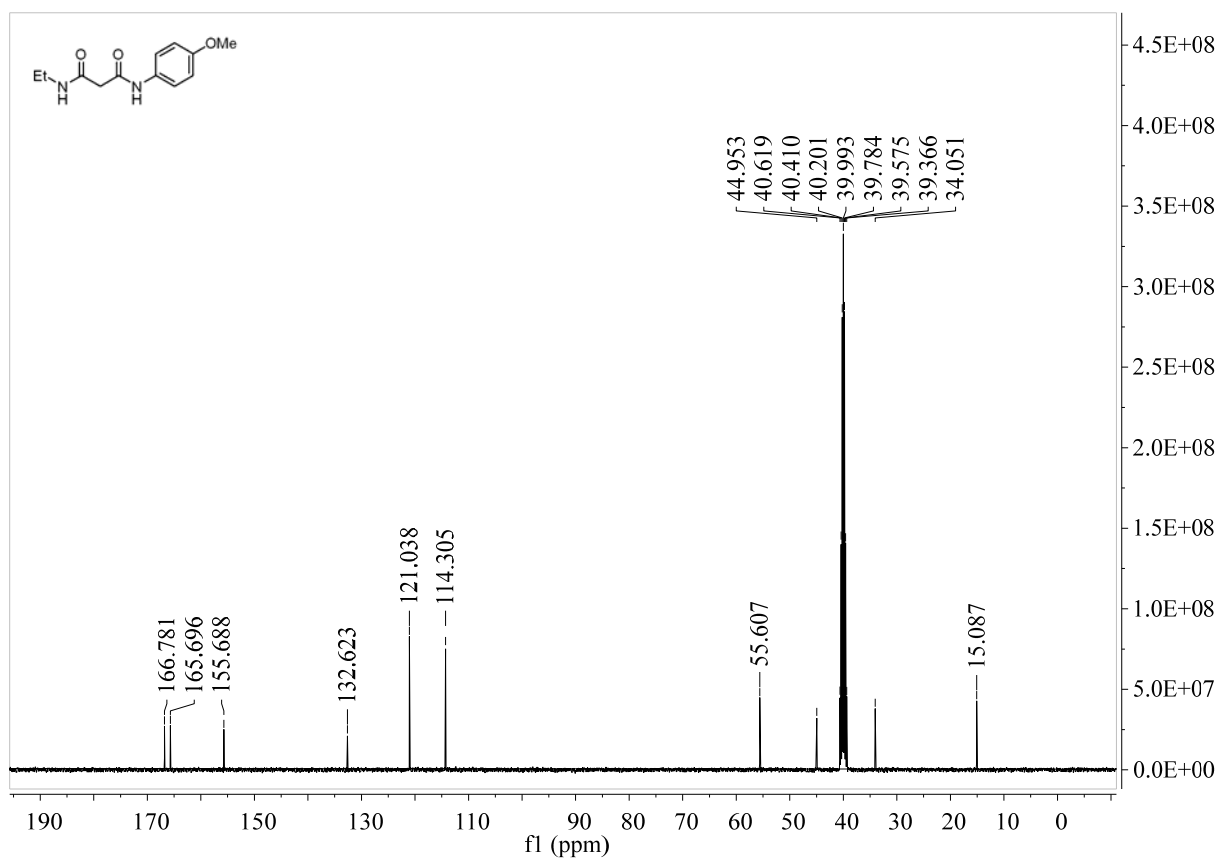

Compound 3z

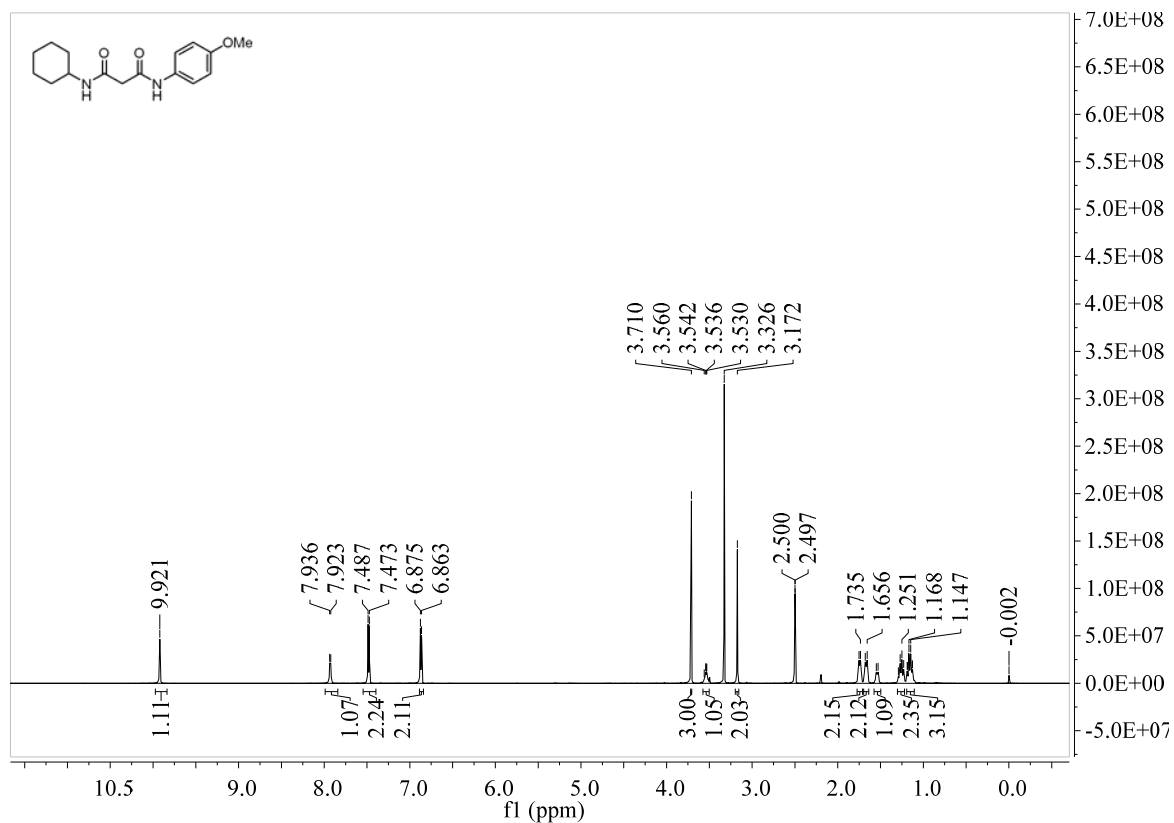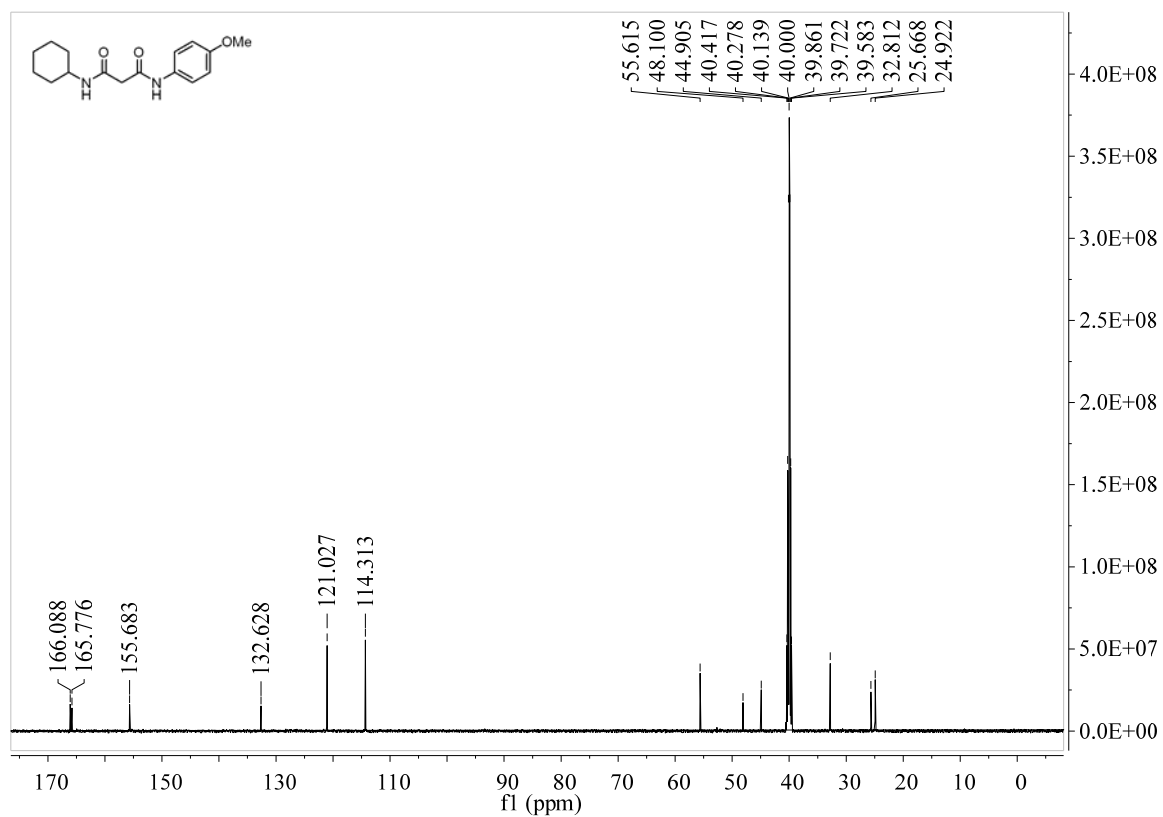



Compound 3ab

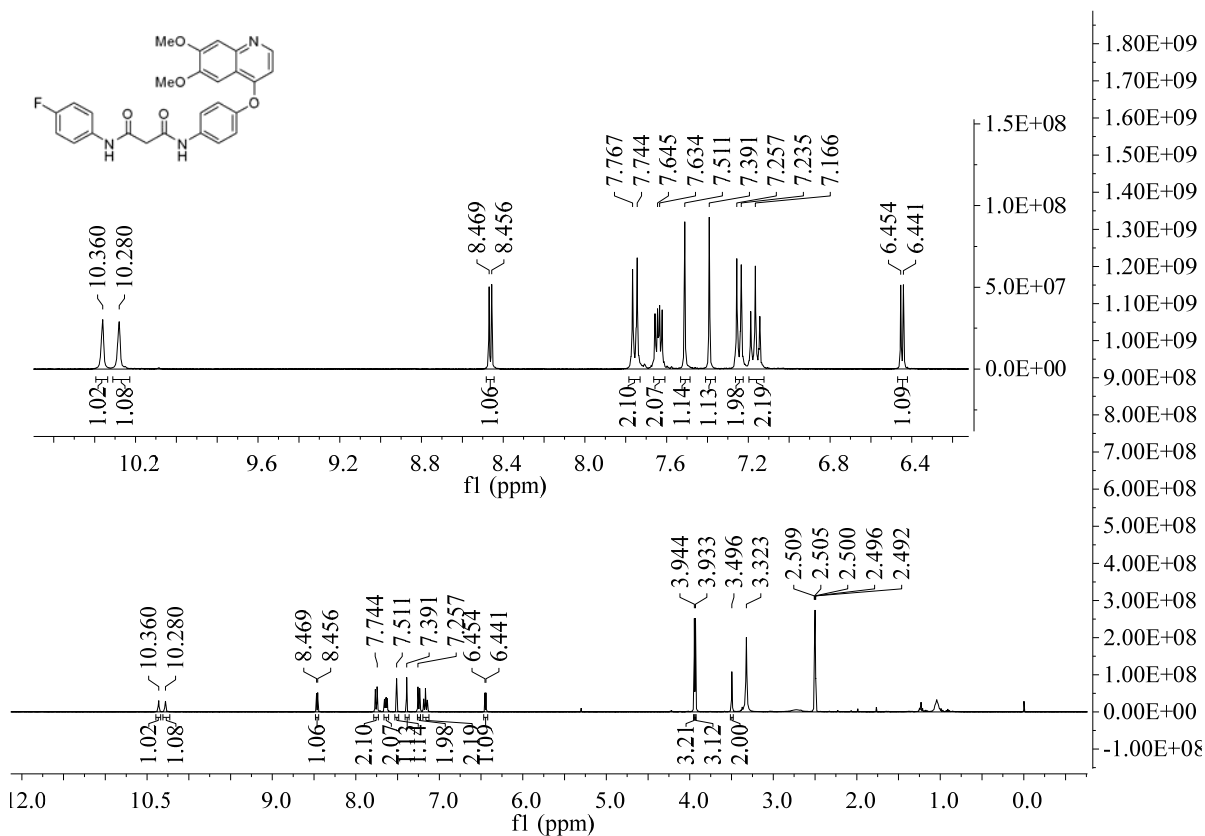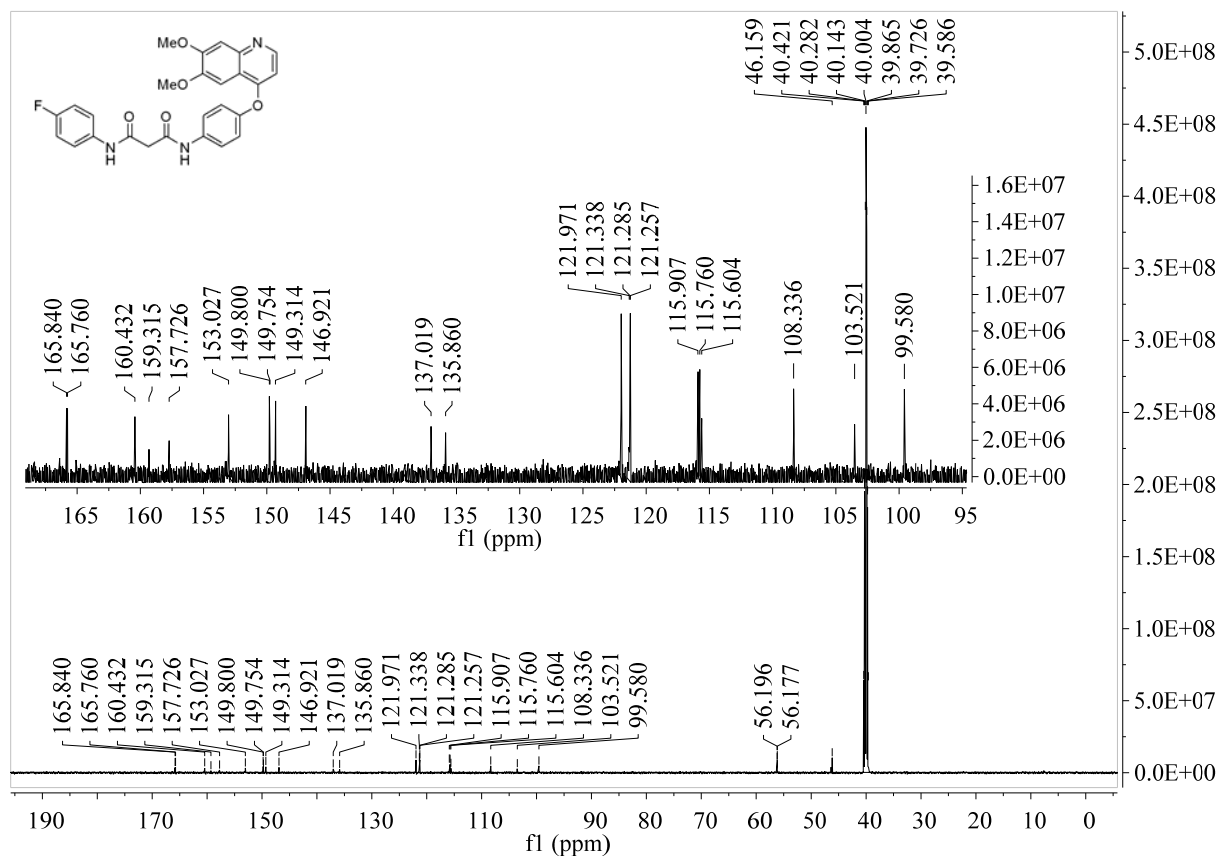

Compound 3ac

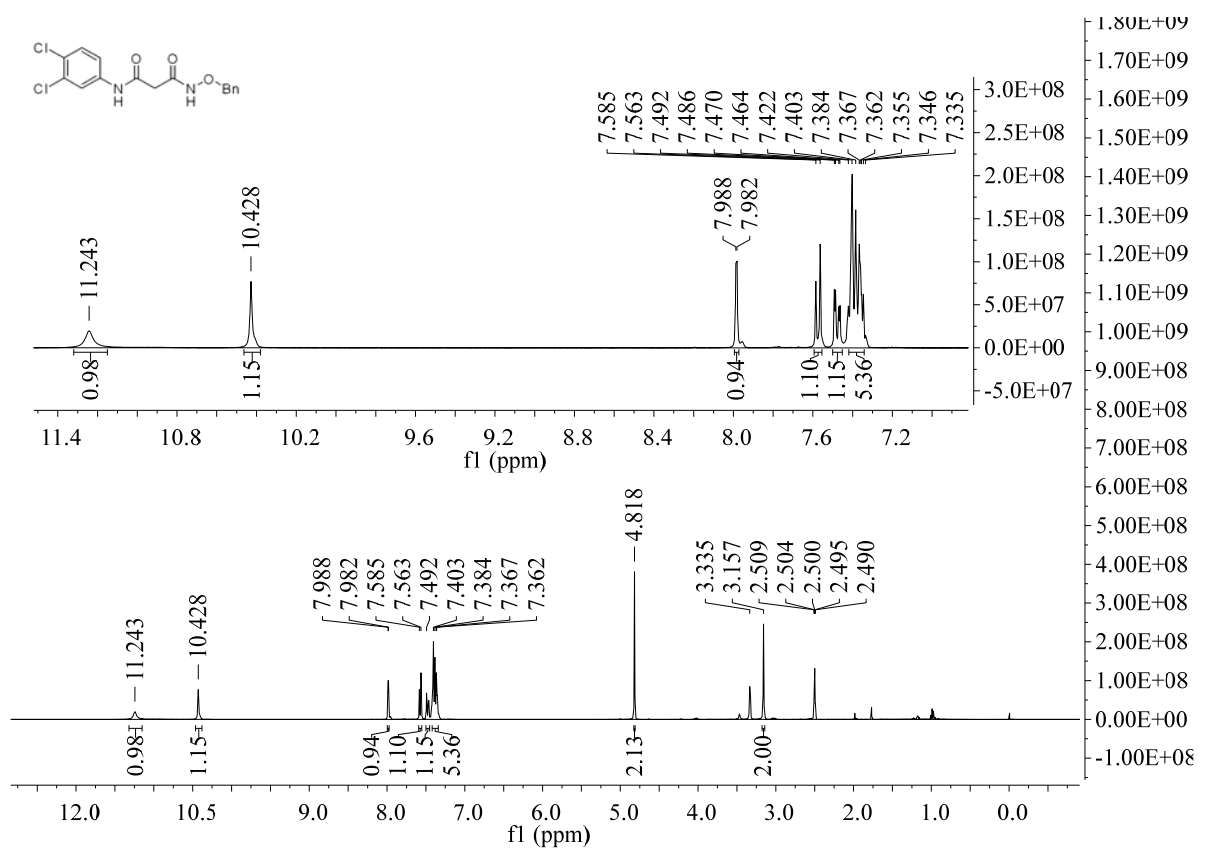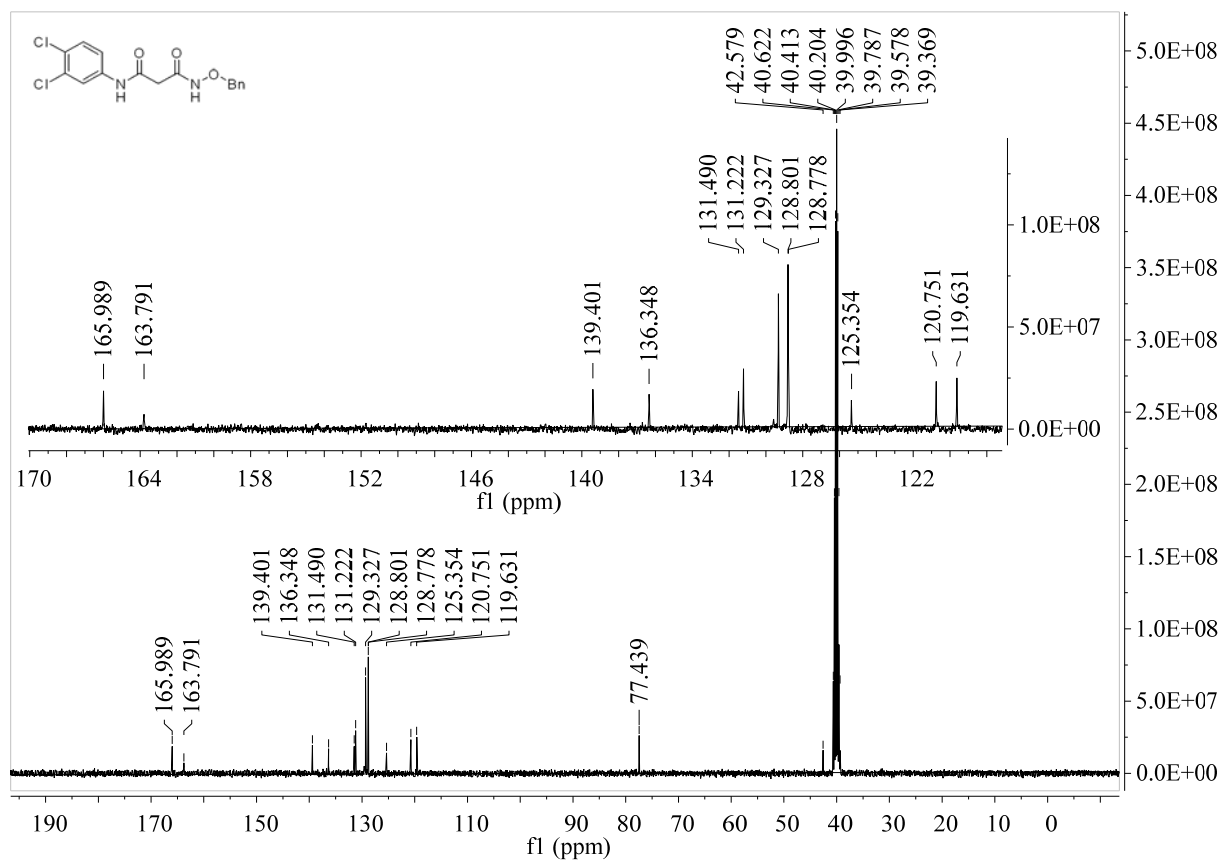

Compound 3ad

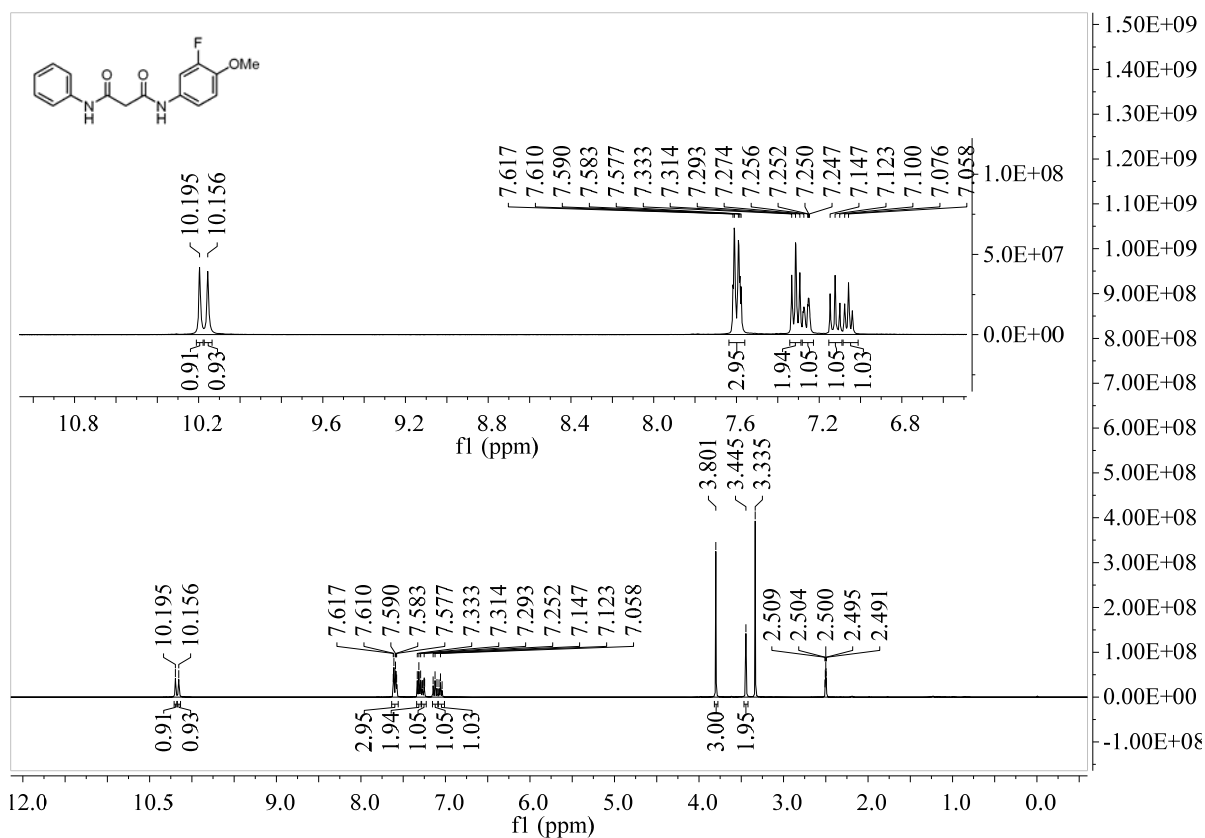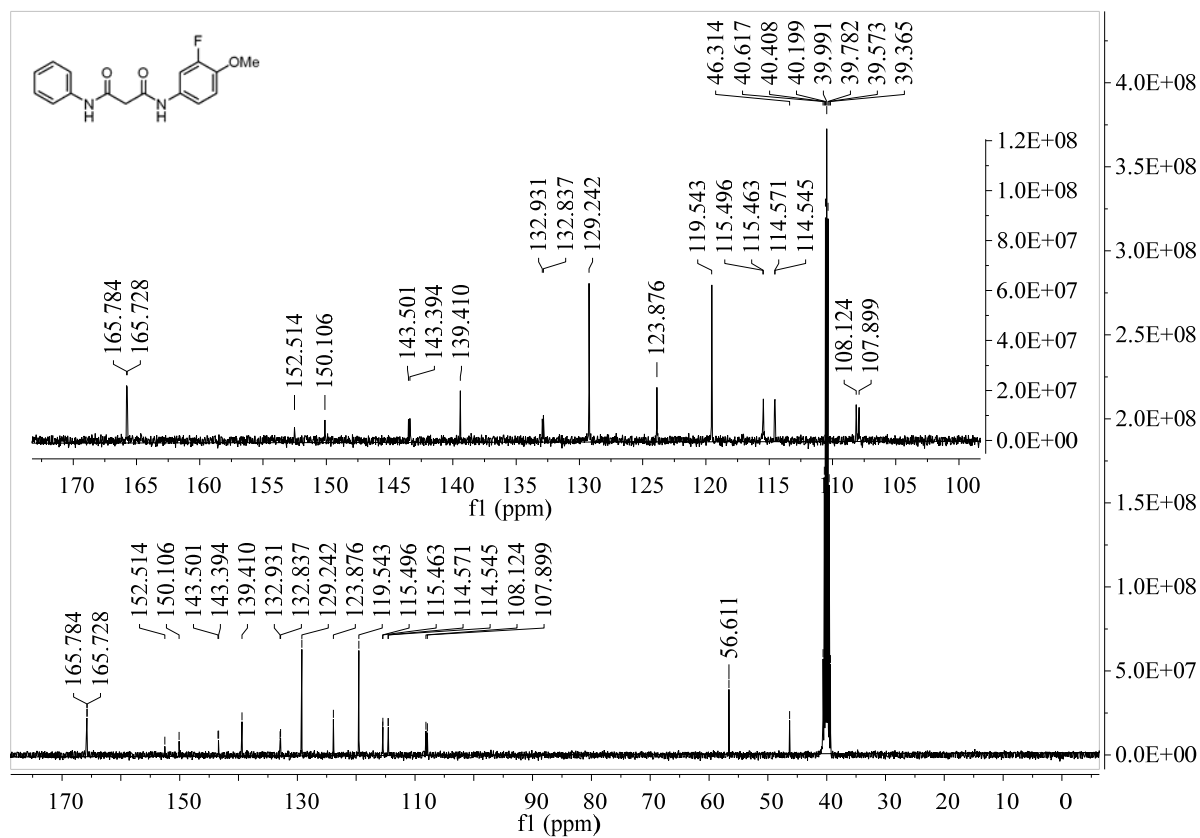

Compound 3ae

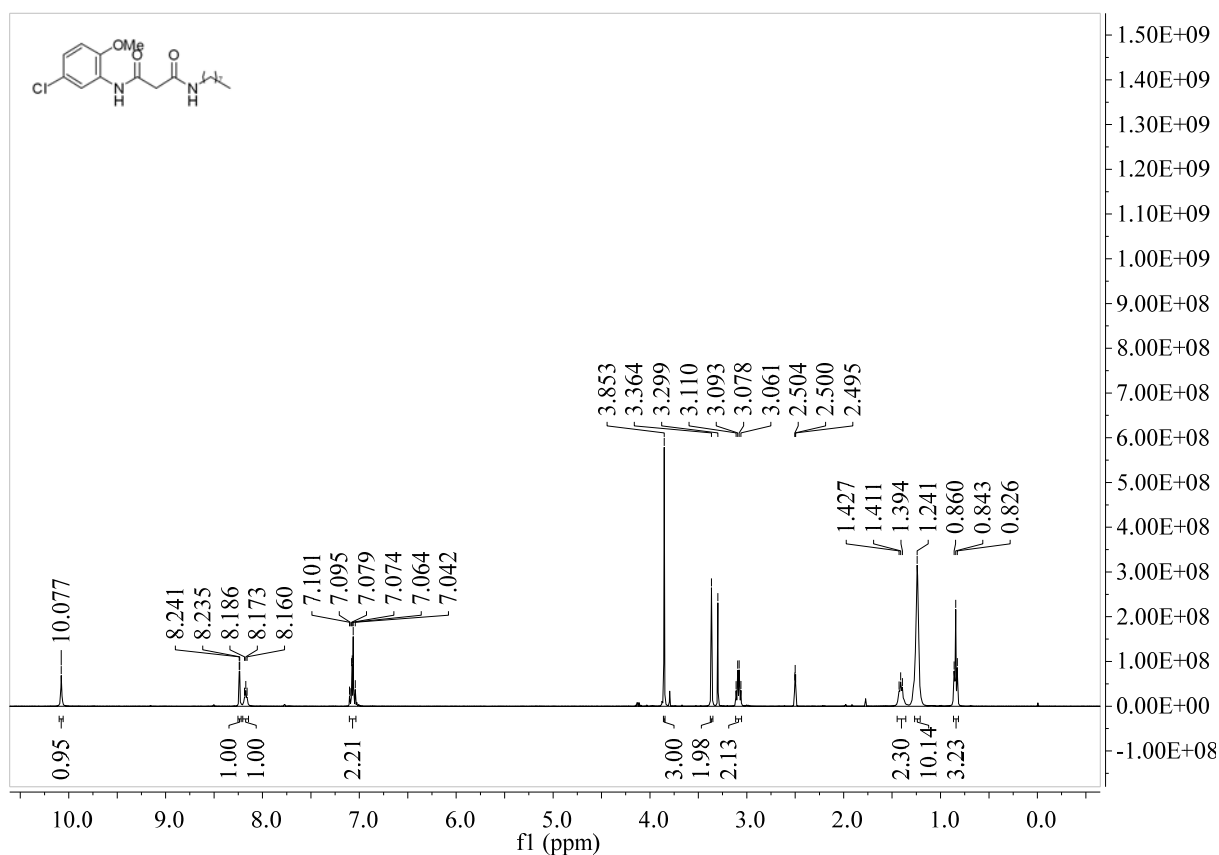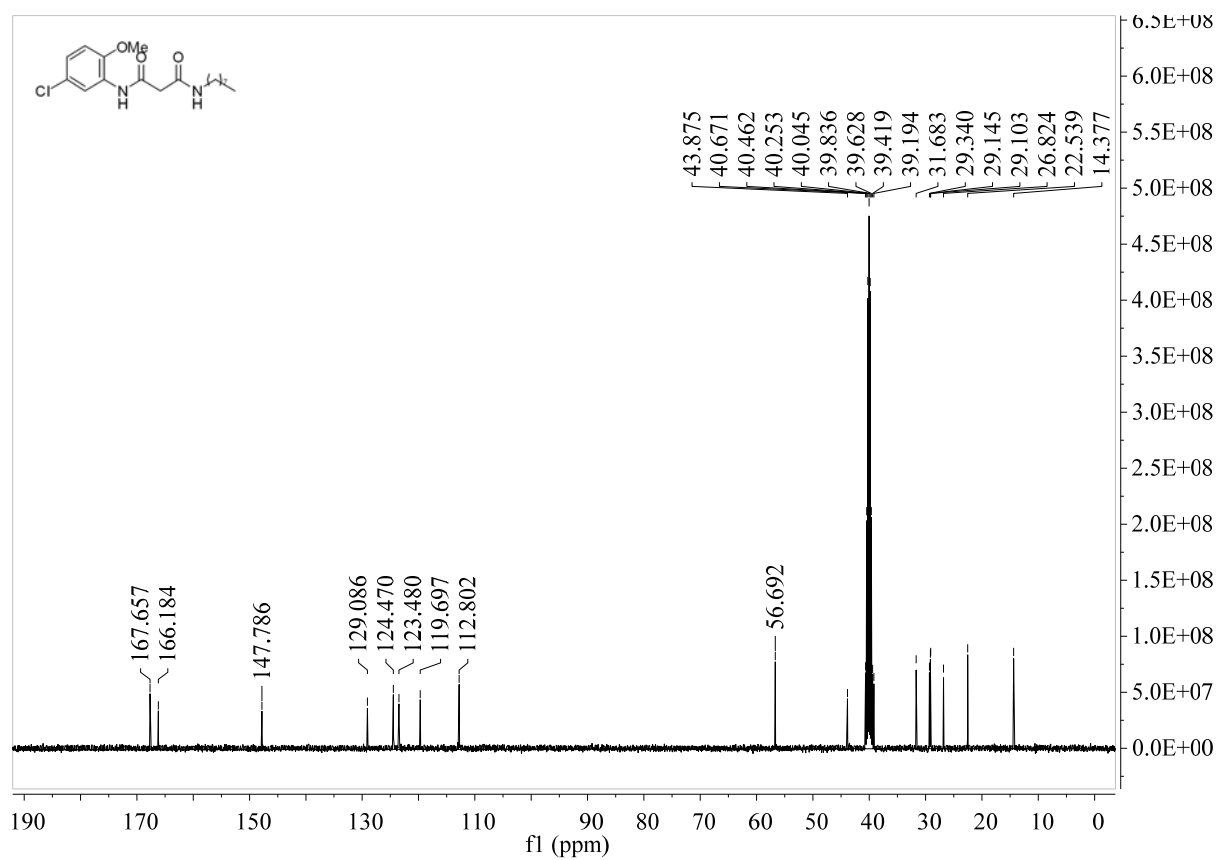

Compound 3af

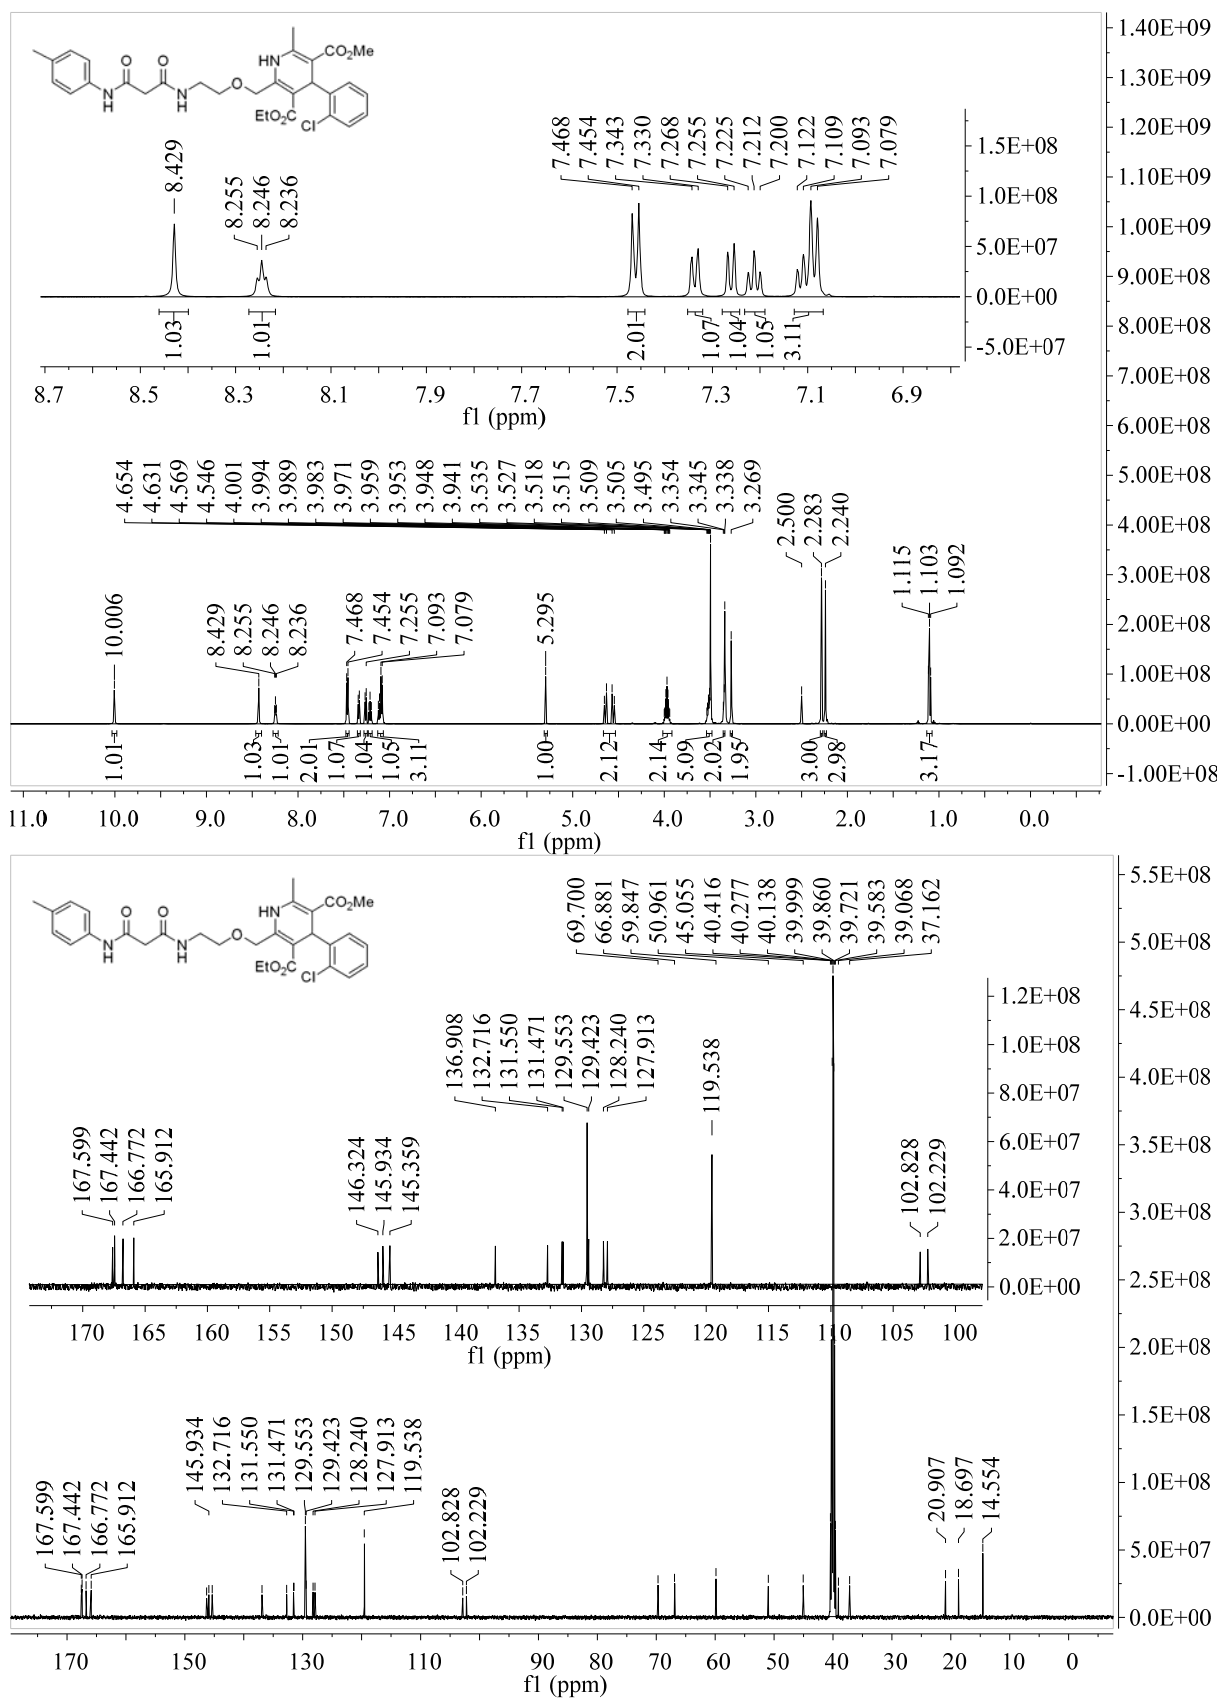

Compound 3ag

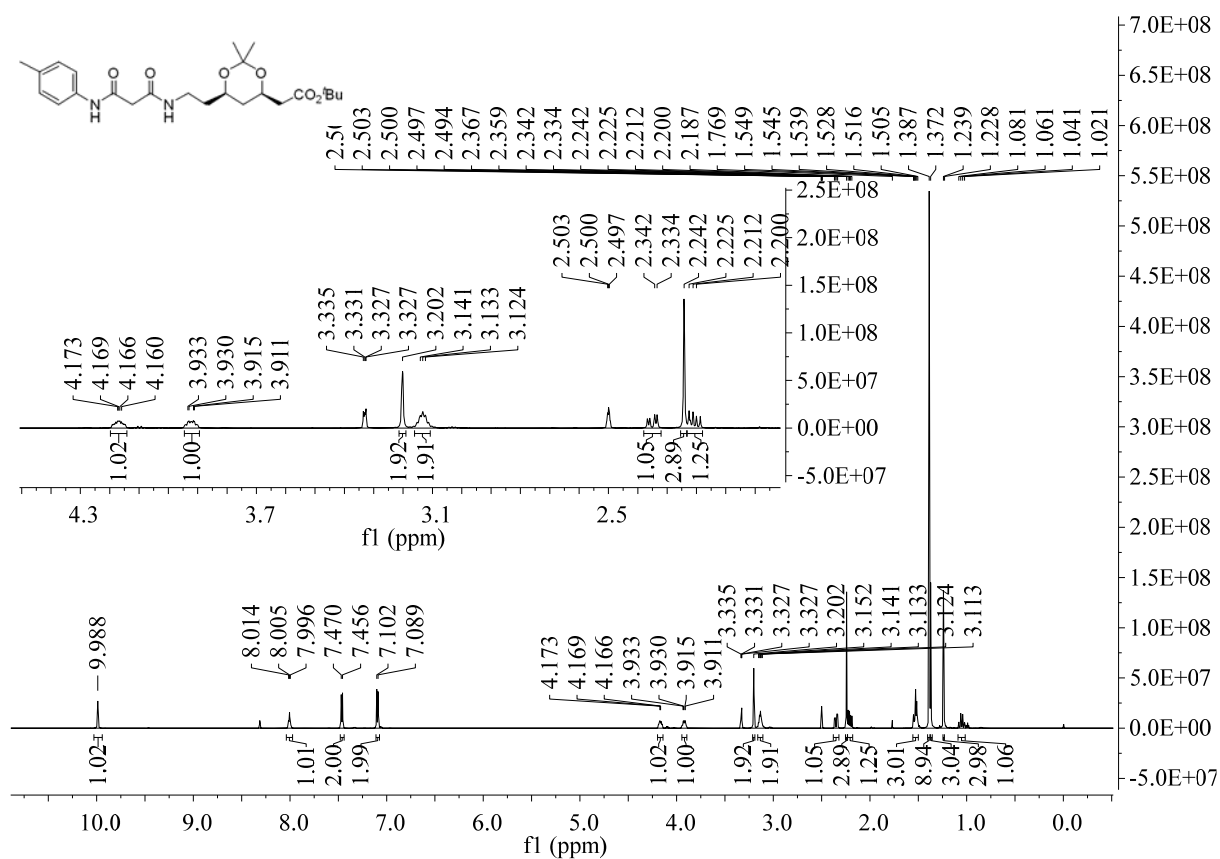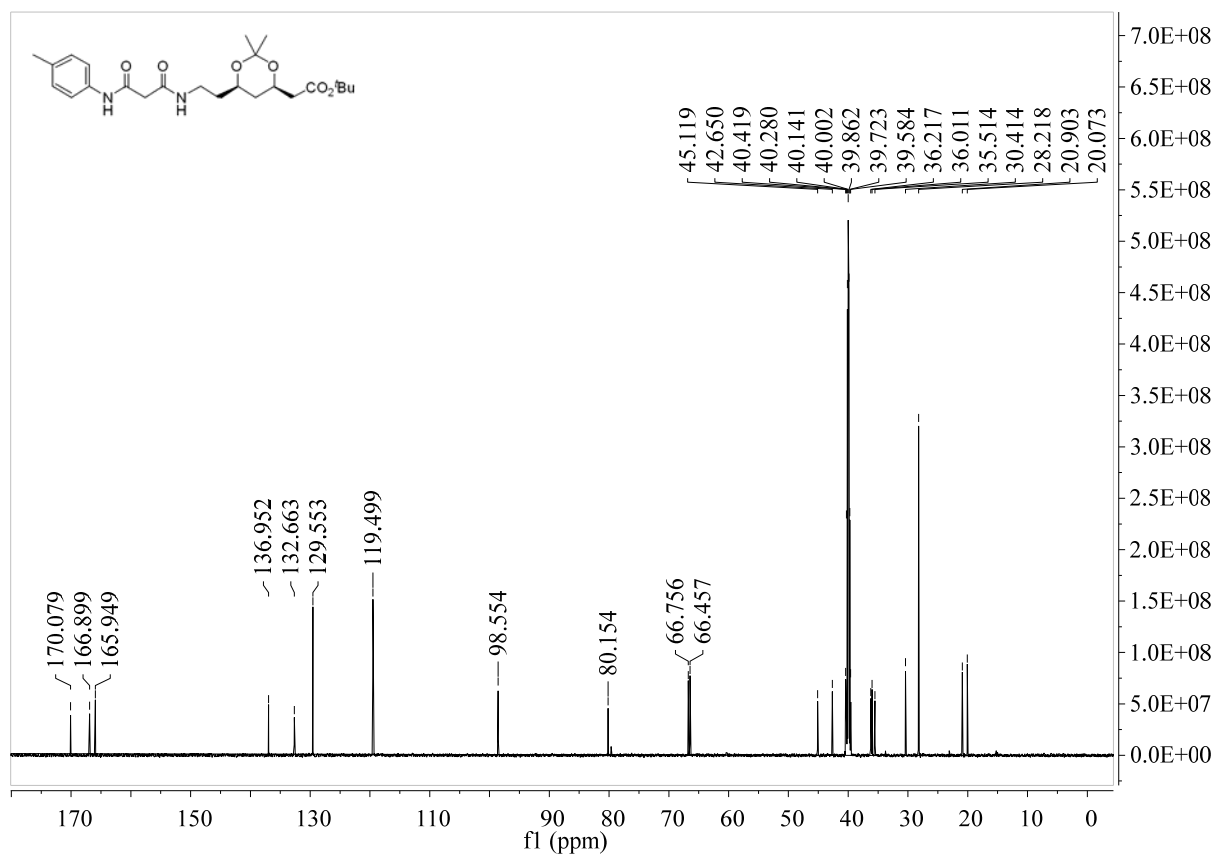

# Compound 3ah

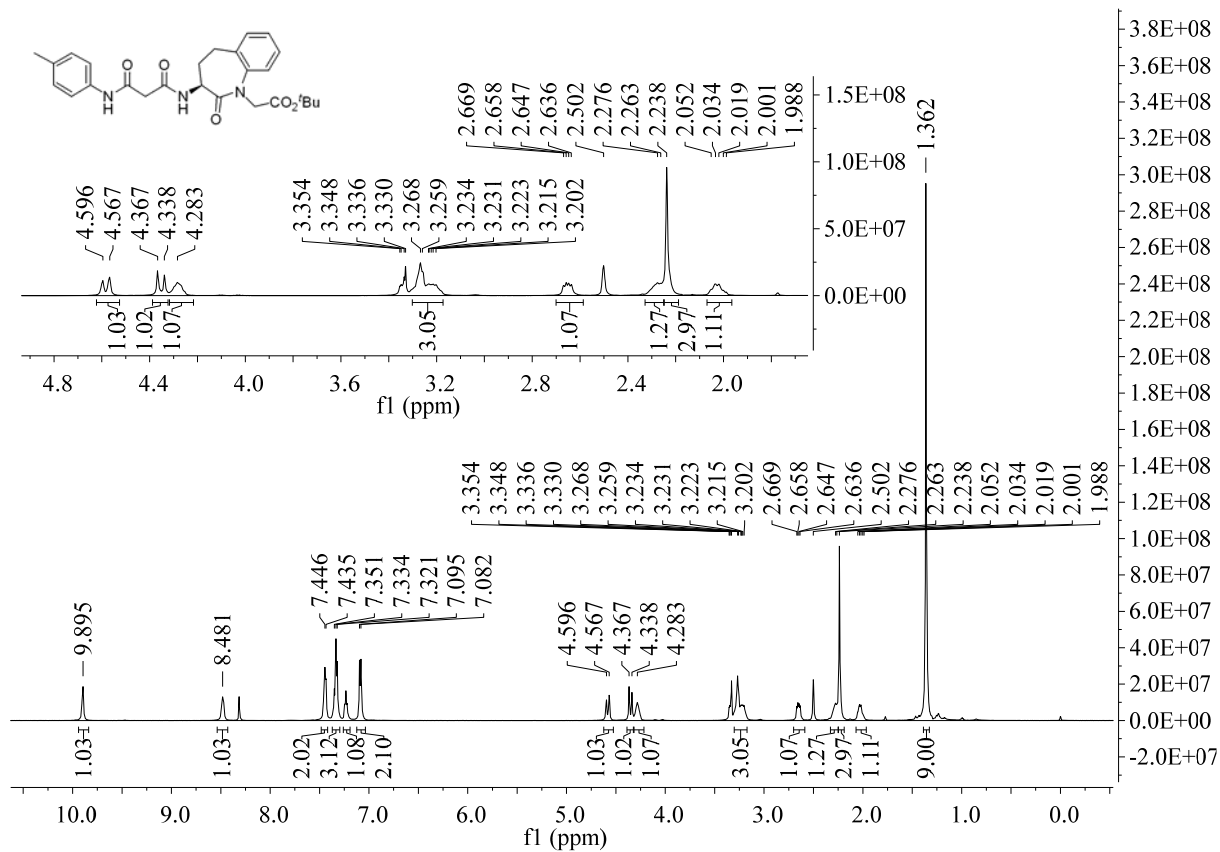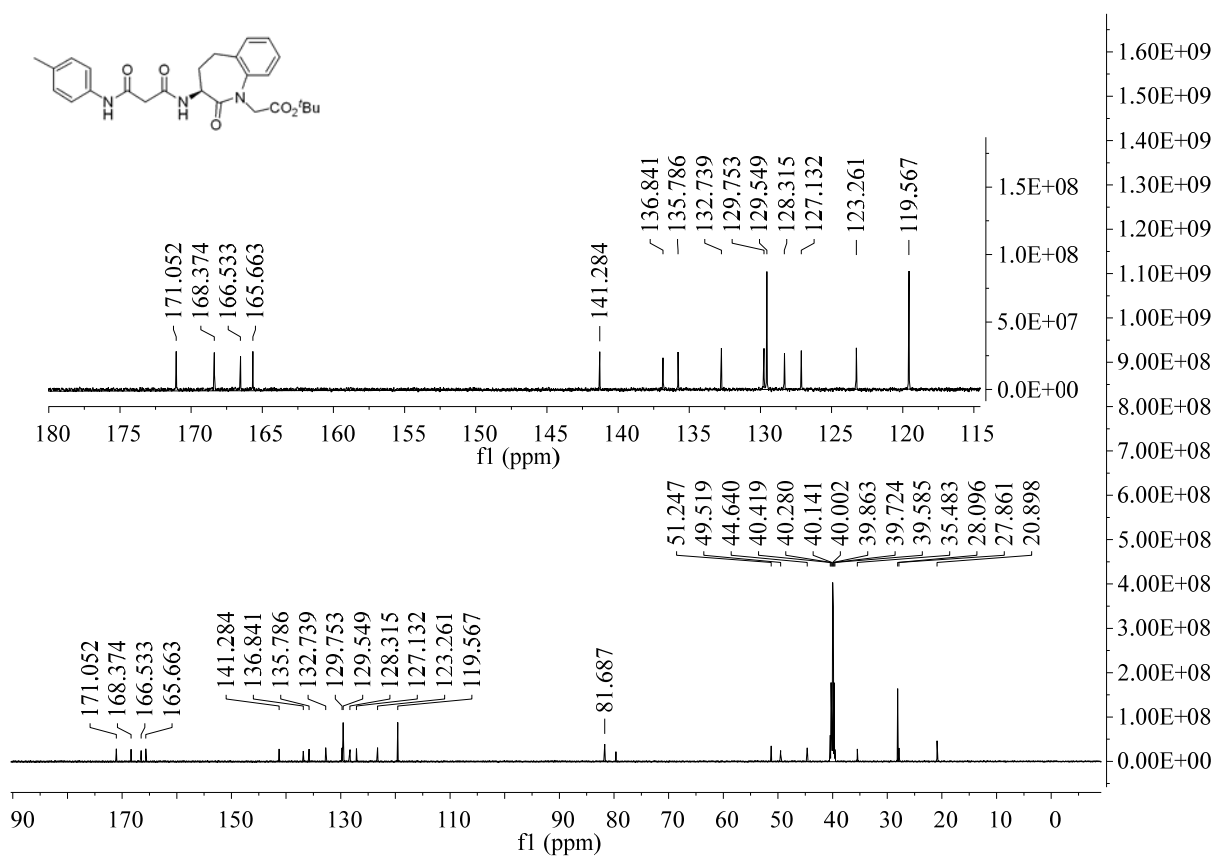

Compound 5

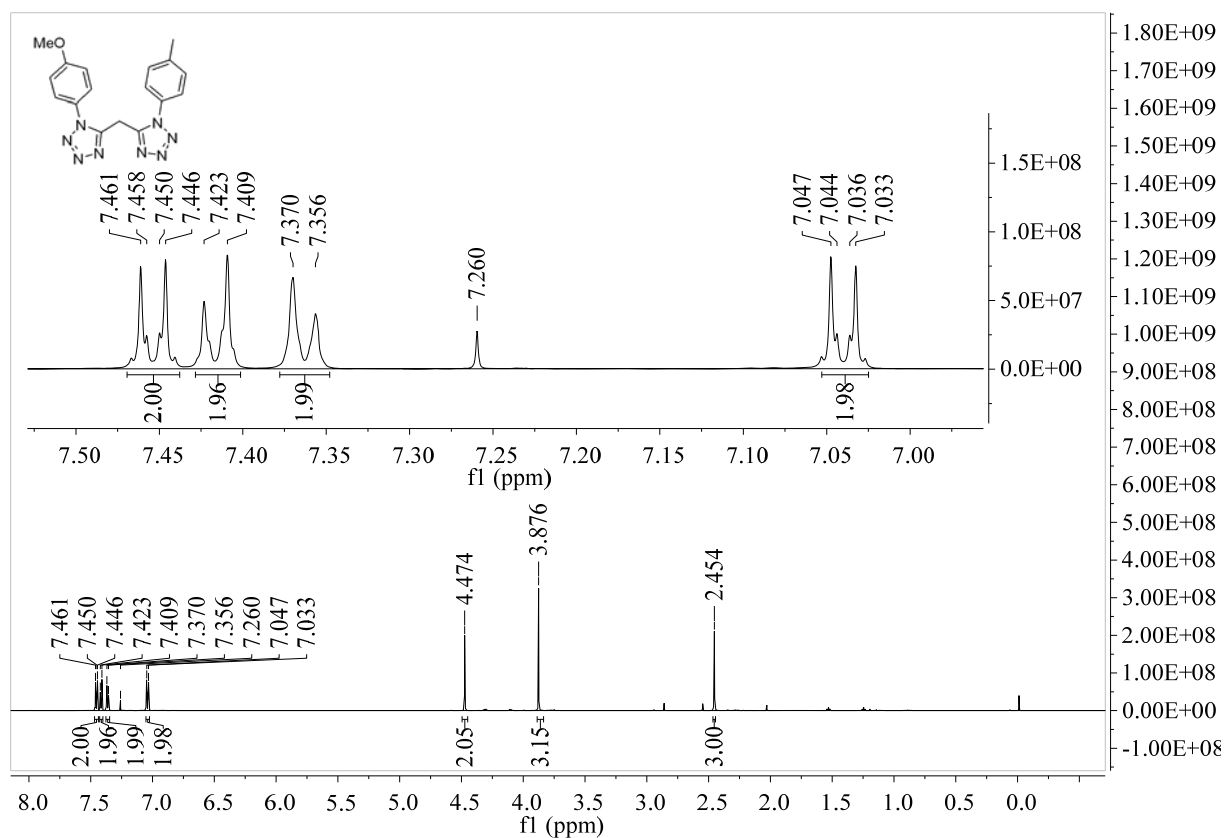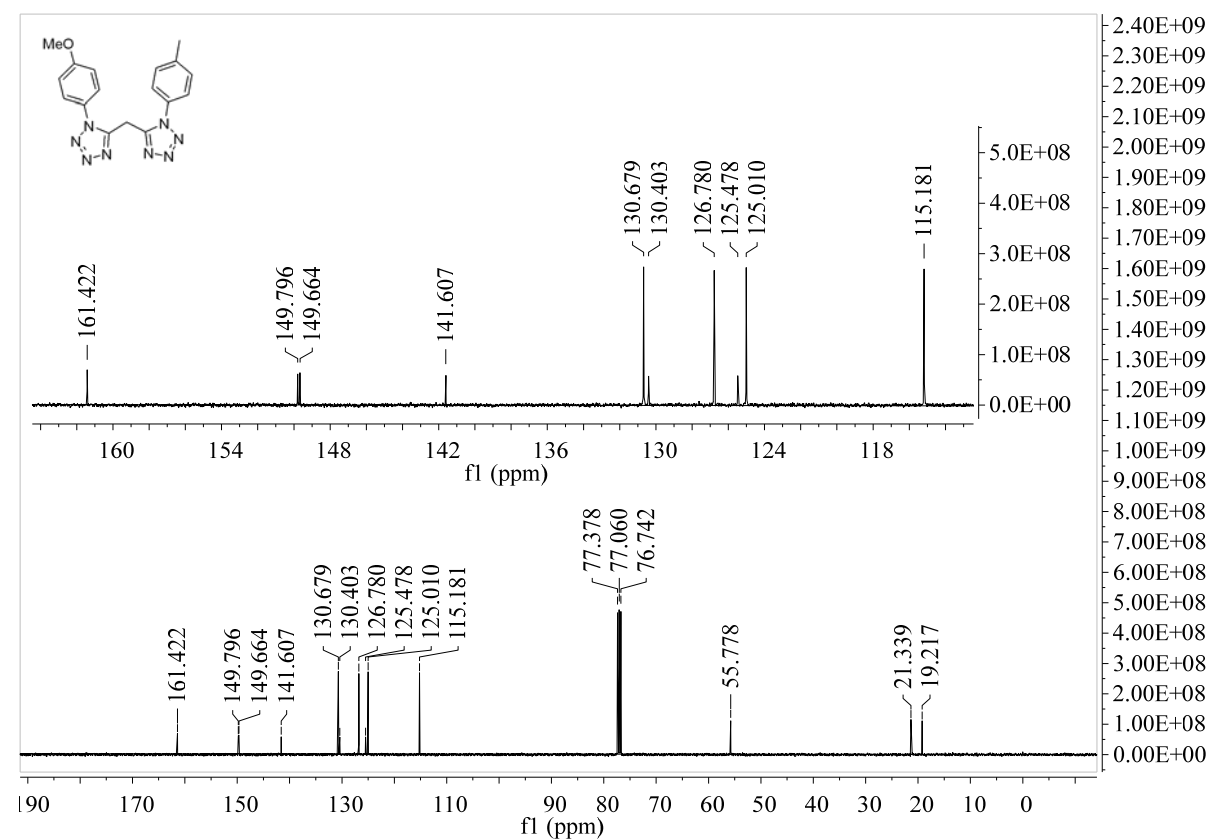

Supplement: d2gc00395c1.pdf [file d2gc00395c1.pdf]
